# Supplementary material for: Quantitative analysis of the human T cell palmitome
Source: PubMed Central journal article supplement (PMC4650600; doi:10.1038/srep11598), 2015-06-26
Supplement: srep11598-s1.pdf [file srep11598-s1.pdf]

## **Supplementary Information**

### **Quantitative analysis of the human T cell palmitome**

Eliot Morrison<sup>1</sup>, Benno Kuroopka<sup>1,2</sup>, Stefanie Kliche<sup>3</sup>, Britta Brügger<sup>4</sup>, Eberhard Krause<sup>2\*</sup> & Christian Freund<sup>1\*</sup>

<sup>1</sup>Freie Universität Berlin, Institut für Chemie und Biochemie, Thielallee 63, 14195 Berlin, Germany

Correspondence: christian.freund@fu-berlin.de, ekrause@fmp-berlin.de

<sup>2</sup>Leibniz-Institut für Molekulare -harmakologie, Robert-Rössle-Strasse 10, 13125 Berlin, Germany

<sup>3</sup>Otto-von-Guericke University, Institute of Molecular and Clinical Immunology, Leipziger Strasse 44, 39120 Magdeburg, Germany

<sup>4</sup>Heidelberg University Biochemistry Center (BZH)Im Neuenheimer Feld 328 69120 Heidelberg.

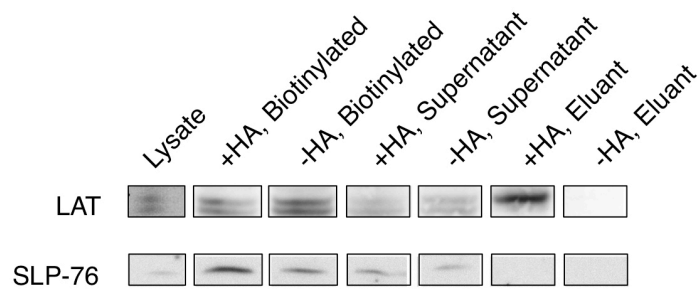

Figure S1. Confirmation of ABE enrichment method by Western blotting. LAT, a canonical palmitoylated protein, was used as a positive control. SLP-76, a protein not reported as palmitoylated, and lacking predicted palmitoylation sites, was used as a negative control. Antibodies used: rabbit polyclonal anti-LAT (Upstate (Millipore)) and Santa Cruz SLP-76 Antibody (F-7). As expected, LAT is enriched in the +HA eluant (but not -HA), while SLP-76 is not detected in either sample.

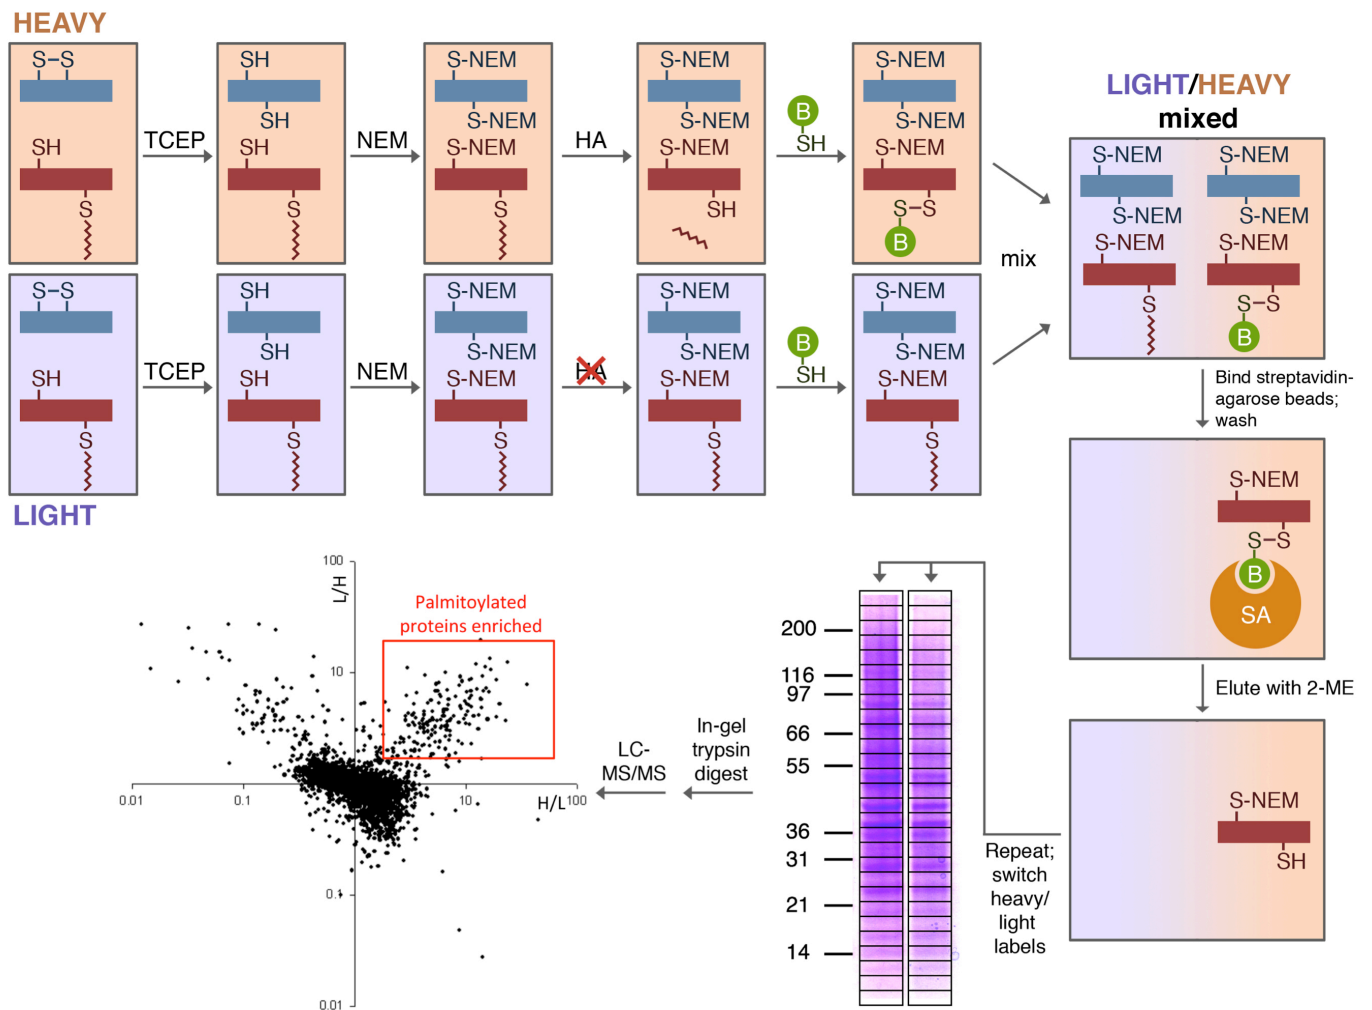

Figure S2. Use of ABE enrichment with SILAC-labeled Jurkat T cells for quantitative analysis of palmitoylated proteins. The use of SILAC labeling allows for the samples to be mixed prior to affinity purification.

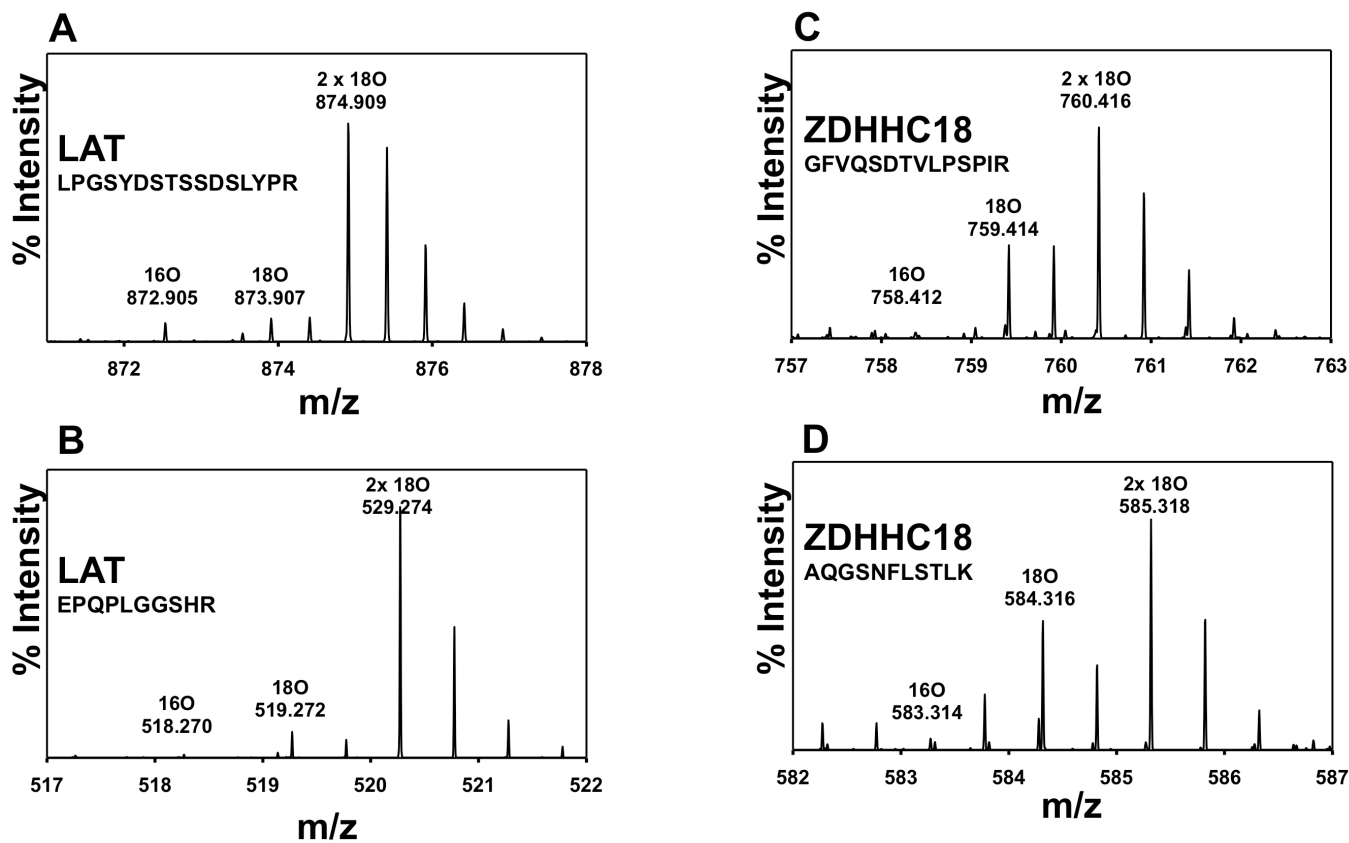

Figure S3. Representative mass spectra of  $^{16}\text{O}/^{18}\text{O}$  labeled tryptic peptides of LAT and ZDHHC18. Isotope pattern of LAT (A, B) and ZDHHC18 (C, D) peptides showing the doubly charged precursor ions with heavy/light ratios greater than 20, indicating enriched palmitoylated protein candidates.

Supplementary Table 1

Palmitoylated proteins enriched in human primary T cells. Using quantification by 16O/18O-labeling, Isotopic ratios were measured (n=4). Ratios greater than 3.0 are considered "enriched" (red).

| UniProt Accession Number | Gene Name | Protein                                                                     | Isotopic Ratio (n = 4) |            |             |            |
|--------------------------|-----------|-----------------------------------------------------------------------------|------------------------|------------|-------------|------------|
|                          |           |                                                                             | Sample 1               | Sample 2   | Sample 3    | Sample 4   |
| O15439                   | ABCC4     | Multidrug resistance-associated protein 4                                   | 161.601                | 13.985     | 21.020      | 25.074     |
| O95870                   | ABHD16A   | Abhydrolase domain-containing protein 16A                                   | 8.587                  | 8.046      | 18.340      | 1.607      |
| Q96G56                   | ABHD17A   | Alpha/beta hydrolase domain-containing protein 17A                          | 113.725                | 491.195    | 16.662      | 9.878      |
| Q5VST6                   | ABHD17B   | Alpha/beta hydrolase domain-containing protein 17B                          | 50.605                 | 7.445      | 7.335       | 11.517     |
| P09110                   | ACAA1     | 3-ketoacyl-CoA thiolase, peroxisomal                                        | 21.969                 | 6.987      | 3.502       | 0.291      |
| P24752                   | ACAT1     | Acetyl-CoA acetyltransferase, mitochondrial                                 | 10.891                 | 23.318     | 9.186       | 6.836      |
| Q9BWD1                   | ACAT2     | Acetyl-CoA acetyltransferase, cytosolic                                     | 7.030                  | 7.467      | 8.061       | 9.250      |
| O14734                   | ACOT8     | Acyl-coenzyme A thioesterase 8                                              | 267156.863             | -          | 520795.660  | 3.601      |
| P33121                   | ACSL1     | Long-chain-fatty-acid--CoA ligase 1                                         | -                      | -          | 6.423       | 4.915      |
| O43707                   | ACTN4     | Alpha-actinin-4                                                             | 0.722                  | -          | 695.841     | 7.364      |
| O14672                   | ADAM10    | Disintegrin and metalloproteinase domain-containing protein 10              | 19.330                 | 45.067     | 7.675       | 8.736      |
| P78536                   | ADAM17    | Disintegrin and metalloproteinase domain-containing protein 17              | 7.873                  | 6.438      | -           | 17.550     |
| Q43306                   | ADCY6     | Adenylate cyclase type 6                                                    | -                      | -          | 918625.678  | 5.109      |
| P51828                   | ADCY7     | Adenylate cyclase type 7                                                    | 8.497                  | 21.918     | 13.450      | 39.616     |
| Q9NUQ2                   | AGPAT5    | 1-acyl-sn-glycerol-3-phosphate acyltransferase epsilon                      | 13.995                 | 4.810      | 0.953       | 3.992      |
| P43353                   | ALDH3B1   | Aldehyde dehydrogenase family 3 member B1                                   | 135.049                | 20.770     | 21.222      | -          |
| Q02252                   | ALDH6A1   | Methylmalonate-semialdehyde dehydrogenase [acylating], mitochondrial        | 1.029                  | 3.921      | 4.843       | 1028.771   |
| Q86YT9                   | AMICA1    | Junctional adhesion molecule-like                                           | 55228.758              | 200084.872 | 0.024       | 4.160      |
| P58335                   | ANTXR2    | Anthrax toxin receptor 2                                                    | 6.763                  | 139.465    | 1721.157    | -          |
| Q63HQ0                   | AP1AR     | AP-1 complex-associated regulatory protein                                  | 5.014                  | -          | -           | 12.825     |
| Q9NXU5                   | ARL15     | ADP-ribosylation factor-like protein 15                                     | 2.655                  | 26.756     | 13.700      | 15.763     |
| Q8N655                   | ARL6IP6   | ADP-ribosylation factor-like protein 6-interacting protein 6                | 31.765                 | 28.962     | 6.340       | 1.346      |
| P98196                   | ATP11A    | Probable phospholipid-transporting ATPase IH                                | 22.328                 | 160.429    | 4.723       | 0.673      |
| Q9Y2G3                   | ATP11B    | Probable phospholipid-transporting ATPase IF                                | 15.980                 | 44.918     | 15.277      | 5.276      |
| Q8NB49                   | ATP11C    | Probable phospholipid-transporting ATPase IG                                | 10.915                 | 4.415      | -           | 0.911      |
| Q9Y487                   | ATP6V0A2  | V-type proton ATPase 116 kDa subunit a isoform 2                            | 6.203                  | 3.416      | 2.390       | 4.235      |
| Q9Y679                   | AUP1      | Ancient ubiquitous protein 1                                                | 15.351                 | 30.405     | 22.655      | 2.479      |
| P15291                   | B4GALT1   | Beta-1,4-galactosyltransferase 1                                            | 40.997                 | 12.565     | 4.336       | -          |
| Q9UBV7                   | B4GALT7   | Beta-1,4-galactosyltransferase 7                                            | 36.160                 | 35.561     | 15.635      | 387096.774 |
| O15155                   | BET1      | BET1 homolog                                                                | 7.460                  | 40.951     | -           | -          |
| Q10589                   | BST2      | Bone marrow stromal antigen 2                                               | 99.837                 | 268.194    | -           | -          |
| Q8N357                   | C2orf18   | Solute carrier family 35 member F6                                          | 8.709                  | 0.449      | 2000000.000 | 3897.123   |
| Q9HA72                   | CALHM2    | Calcium homeostasis modulator protein 2                                     | 801.961                | 148.462    | 7.555       | 55.920     |
| P27824                   | CANX      | Calnexin                                                                    | 10.025                 | 7.950      | 4.662       | 5.214      |
| O15484                   | CAPN5     | Calpain-5                                                                   | -                      | 3.787      | 5.298       | 4.105      |
| A6NI79                   | CCDC69    | Coiled-coil domain-containing protein 69                                    | 0.635                  | 162.296    | 18.705      | 72.424     |
| Q8ND76                   | CCNY      | Cyclin-Y                                                                    | 25.842                 | 119.436    | 6.886       | 17.105     |
| P51681                   | CCR5      | C-C chemokine receptor type 5                                               | 9.575                  | 222.151    | -           | 0.040      |
| P48509                   | CD151     | CD151 antigen                                                               | 105.392                | 46.022     | 198.156     | 155.013    |
| Q8TD46                   | CD200R1   | Cell surface glycoprotein CD200 receptor 1                                  | 5.264                  | 9.735      | -           | -          |
| P26842                   | CD27      | CD27 antigen                                                                | 6.728                  | 4.197      | -           | -          |
| P16671                   | CD36      | Platelet glycoprotein 4 (Fragment)                                          | 17.500                 | 8.112      | 23.251      | 9.651      |
| P11049                   | CD37      | Leukocyte antigen CD37                                                      | 9803.922               | 498.833    | 39.385      | 24.821     |
| P28907                   | CD38      | ADP-ribosyl cyclase 1                                                       | 16.748                 | 75.875     | 8.561       | 4.714      |
| P04234                   | CD3D      | T-cell surface glycoprotein CD3 delta chain                                 | 3.584                  | 169.913    | 3.497       | 1.555      |
| P01730                   | CD4       | T-cell surface glycoprotein CD4                                             | 557.516                | 21.303     | 6.579       | 3.562      |
| P16070                   | CD44      | CD44 antigen (Fragment)                                                     | 10.229                 | 6.270      | 13.787      | 2.688      |
| P19397                   | CD53      | Leukocyte surface antigen CD53                                              | 10375.817              | 87417.781  | 29.382      | 527.201    |
| P08962                   | CD63      | CD63 antigen                                                                | 1176.471               | 78.909     | 7.769       | 101.482    |
| P09564                   | CD7       | T-cell antigen CD7                                                          | 38.497                 | 11.269     | 44.810      | 5.105      |
| P21854                   | CD72      | B-cell differentiation antigen CD72                                         | 111.928                | 797793.338 | -           | -          |
| P27701                   | CD82      | CD82 antigen                                                                | 1233.660               | 24.337     | 9.447       | 2.144      |
| Q01151                   | CD83      | CD83 antigen                                                                | 38.145                 | 17.399     | -           | -          |
| P21926                   | CD9       | CD9 antigen                                                                 | 2.807                  | -          | 9.750       | 7.352      |
| P40200                   | CD96      | T-cell surface protein tactile                                              | 14.436                 | -          | 11.812      | 3.660      |
| P48960                   | CD97      | CD97 antigen                                                                | 19444.444              | 187.609    | 5.920       | 152.572    |
| P14209                   | CD99      | CD99 antigen                                                                | 9.355                  | 99.279     | -           | 1.767      |
| Q8TC22                   | CD99L2    | CD99 antigen-like protein 2                                                 | 87.582                 | 26.034     | -           | 0.408      |
| Q5VV42                   | CDKAL1    | Threonylcarbamoyladenosine tRNA methyltransferase                           | -                      | -          | 10.311      | 24.621     |
| Q07065                   | CKAP4     | Cytoskeleton-associated protein 4                                           | 6.022                  | 6.650      | 18.882      | 6.864      |
| Q9NY35                   | CLDN1     | Claudin domain-containing protein 1                                         | 8.685                  | 39.593     | 5.776       | 4.809      |
| Q6PJW8                   | CNST      | Consortin                                                                   | 9.379                  | 10.632     | 14.181      | 2.660      |
| Q86VU5                   | COMTD1    | Catechol O-methyltransferase domain-containing protein 1 (Fragment)         | -                      | 28.559     | -           | 18.195     |
| Q9HCP0                   | CSNK1G1   | Casein kinase I isoform gamma-1                                             | 272875.817             | 46.361     | 34.250      | 109.154    |
| P78368                   | CSNK1G2   | Casein kinase I isoform gamma-2                                             | 26.993                 | 22.342     | 13.345      | 23.435     |
| Q9Y6M4                   | CSNK1G3   | Casein kinase I isoform gamma-3                                             | 4.739                  | 38.808     | 51.139      | 364.778    |
| Q9GZU7-2                 | CTDSP1    | Carboxy-terminal domain RNA polymerase II polypeptide A small phosphatase 1 | 29.020                 | 20.161     | 11.143      | 21.325     |
| Q9GZU7                   | CTDSP1    | Carboxy-terminal domain RNA polymerase II polypeptide A small phosphatase 1 | 76.160                 | -          | -           | 35.998     |
| O14595                   | CTDSP2    | Carboxy-terminal domain RNA polymerase II polypeptide A small phosphatase 2 | 9.845                  | 7.208      | 4.872       | 7.286      |
| P04839                   | CYBB      | Cytochrome b-245 heavy chain                                                | 6.739                  | 12.540     | 4.727       | 6.962      |
| Q9Y4D1                   | DAAM1     | Disheveled-associated activator of morphogenesis 1                          | -                      | 12.536     | 64.376      | 5.983      |
| Q8NCG7                   | DAGLB     | Sn1-specific diacylglycerol lipase beta                                     | 5.753                  | 14.802     | 12.311      | 14.054     |
| Q8IWE4                   | DCUN1D3   | DCN1-like protein 3                                                         | -                      | 3.285      | 63.472      | 7.806      |
| Q9P202                   | DFNB31    | Whirlin                                                                     | -                      | 435.179    | 7811.935    | -          |
| P52429                   | DGKE      | Diacylglycerol kinase epsilon                                               | 60.065                 | 78.061     | -           | 1.657      |
| O75190-3                 | DNAJB6    | DnaJ homolog subfamily B member 6                                           | 4.409                  | -          | -           | 11.186     |
| Q9H3Z4                   | DNAJC5    | DnaJ homolog subfamily C member 5                                           | 3.697                  | 32.251     | -           | 0.090      |
| P42892                   | ECE1      | Endothelin-converting enzyme 1                                              | 4.242                  | 5.648      | 7.374       | 1.469      |
| Q14156                   | EFR3A     | Protein EFR3 homolog A                                                      | 7.650                  | 6.675      | 13.081      | 42.781     |
| Q7L2H7                   | EIF3M     | Eukaryotic translation initiation factor 3 subunit M                        | -                      | -          | 70.127      | 23.592     |
| Q9NYP7                   | ELOVL5    | Elongation of very long chain fatty acids protein 5                         | 20.907                 | 97.857     | -           | 0.435      |
| P54852                   | EMP3      | Epithelial membrane protein 3 (Fragment)                                    | 10.850                 | 21.409     | -           | 6.284      |
| Q9Y227                   | ENTPD4    | Ectonucleoside triphosphate diphosphohydrolase 4                            | 8.366                  | 7.749      | -           | 308.195    |
| Q96RT1                   | ERBB2IP   | Protein LAP2                                                                | 162.418                | 44.388     | 10.300      | 31.037     |
| Q969X5                   | ERGIC1    | Endoplasmic reticulum-Golgi intermediate compartment protein 1              | 8.742                  | 7.513      | 5.118       | 2.874      |
| Q96RQ1                   | ERGIC2    | Endoplasmic reticulum-Golgi intermediate compartment protein 2              | 5.110                  | -          | -           | 4.467      |
| Q9Y282                   | ERGIC3    | Endoplasmic reticulum-Golgi intermediate compartment protein 3              | 82.925                 | 10.278     | 14.828      | 70.732     |
| P34910                   | EVI2B     | Protein EVI2B                                                               | 5.288                  | 12.238     | 25.931      | 2.371      |
| Q92817                   | EVPL      | Envoplakin                                                                  | -                      | 41.417     | 22.304      | -          |
| Q8N128                   | FAM177A1  | Protein FAM177A1                                                            | 3.268                  | 9.419      | -           | -          |

| UniProt Accession Number | Gene Name | Protein                                                                  | Isotopic Ratio (n = 4) |           |            |            |
|--------------------------|-----------|--------------------------------------------------------------------------|------------------------|-----------|------------|------------|
|                          |           |                                                                          | Sample 1               | Sample 2  | Sample 3   | Sample 4   |
| Q9NUQ9                   | FAM49B    | Protein FAM49B                                                           | 25.833                 | 34.585    | 2.233      | 6.500      |
| P25445                   | FAS       | Tumor necrosis factor receptor superfamily member 6                      | 8.050                  | 21.918    | -          | 2.241      |
| Q9Y311                   | FBXO7     | F-box only protein 7                                                     | -                      | 19.111    | 5.291      | 1.188      |
| P09769                   | FGR       | Tyrosine-protein kinase Fgr                                              | 106.863                | 4.772     | -          | 17.655     |
| O75955                   | FLOT1     | Flotillin-1                                                              | 33.252                 | 15.374    | 6.807      | 13.888     |
| Q14254                   | FLOT2     | Flotillin-2                                                              | 8.636                  | 17.976    | 9.910      | 318.919    |
| Q9Y2H6                   | FNDC3A    | Fibronectin type-III domain-containing protein 3A                        | 41748.366              | 28.071    | 969258.590 | 5.001      |
| P06241                   | FYN       | Tyrosine-protein kinase Fyn                                              | 11.552                 | 2.667     | 5.526      | 5666.957   |
| Q10472                   | GALNT1    | Polypeptide N-acetylgalactosaminyltransferase 1                          | 8.521                  | 7.106     | 1.391      | -          |
| Q9UG22                   | GIMAP2    | GTPase IMAP family member 2                                              | 33.791                 | -         | 3.482      | 3.012      |
| P29992                   | GNA11     | Guanine nucleotide-binding protein subunit alpha-11                      | 4.256                  | 6216.847  | -          | 31.194     |
| Q03113                   | GNA12     | Guanine nucleotide-binding protein subunit alpha-12                      | -                      | 101.613   | 15.555     | 11682.650  |
| Q14344                   | GNA13     | Guanine nucleotide-binding protein subunit alpha-13                      | 87.337                 | 46.255    | 13.132     | 5.983      |
| P09471-2                 | GNAO1     | Isoform Alpha-2 of Guanine nucleotide-binding protein G(o) subunit alpha | 23.725                 | 72.926    | 4.727      | 1.216      |
| P50148                   | GNAQ      | Guanine nucleotide-binding protein G(q) subunit alpha                    | 6601.307               | 153.469   | 150.633    | 5675.676   |
| P63092                   | GNAS      | Guanine nucleotide-binding protein G(s) subunit alpha isoforms short     | 8.431                  | 9.092     | 6.011      | -          |
| P19086                   | GNAZ      | Guanine nucleotide-binding protein G(z) subunit alpha                    | 1781.046               | 168.152   | 4.582      | 195.031    |
| Q725G4                   | GOLGA7    | Golgin subfamily A member 7                                              | 6.518                  | 2.858     | 5.993      | -          |
| Q2TAP0                   | GOLGA7B   | Golgin subfamily A member 7B                                             | 0.016                  | 29.900    | 5.436      | -          |
| Q14789                   | GOLGB1    | Golgin subfamily B member 1                                              | -                      | 3.253     | 7.291      | 0.253      |
| Q99795                   | GPA33     | Cell surface A33 antigen                                                 | 19.763                 | 26.247    | 23.555     | 5.605      |
| Q9NPR9                   | GPR108    | Protein GPR108                                                           | 99673.203              | -         | -          | 22.616     |
| P32249                   | GPR183    | G-protein coupled receptor 183                                           | 5.566                  | -         | 4.745      | 3452.485   |
| Q15743                   | GPR68     | Ovarian cancer G-protein coupled receptor 1                              | 88.480                 | 23.955    | 19.107     | 1979.076   |
| Q62Vf9                   | GPRIN3    | G protein-regulated inducer of neurite outgrowth 3                       | 30.556                 | 8.500     | 7.790      | 3.553      |
| Q9BSH5                   | HDDHD3    | Haloacid dehalogenase-like hydrolase domain-containing protein 3         | -                      | 3.367     | 0.678      | 3.142      |
| O75146                   | HIP1R     | Huntingtin-interacting protein 1-related protein                         | -                      | -         | 547.197    | 54.333     |
| P30504                   | HLA-C     | HLA class I histocompatibility antigen, Cw-4 alpha chain                 | 24.069                 | 4.078     | -          | -          |
| P30501                   | HLA-C     | HLA class I histocompatibility antigen, Cw-2 alpha chain                 | -                      | -         | 8.347      | 30.166     |
| P13598                   | ICAM2     | Intercellular adhesion molecule 2                                        | 1094.771               | 26.926    | -          | -          |
| Q01628                   | IFITM3    | Interferon-induced transmembrane protein 3                               | 5.023                  | 14.021    | -          | -          |
| Q969P0                   | IGSF8     | Immunoglobulin superfamily member 8                                      | 643.382                | 760.025   | 6.647      | 9.102      |
| Q9H0X4                   | ITFG3     | Protein ITFG3                                                            | 108.742                | -         | 9.353      | -          |
| P23229                   | ITGA6     | Integrin alpha-6                                                         | 101.144                | 18.542    | 5.110      | -          |
| O43736                   | ITM2A     | Integral membrane protein 2A                                             | -                      | 100.191   | 55.552     | 59.895     |
| P23458                   | JAK1      | Tyrosine-protein kinase JAK1                                             | 40.302                 | 6.964     | 5.566      | 0.354      |
| Q9BX67                   | JAM3      | Junctional adhesion molecule C                                           | 8.595                  | 10.401    | 142.025    | 7.636      |
| Q9Y4C1                   | KDM3A     | Lysine-specific demethylase 3A                                           | -                      | -         | 3.558      | 158674.804 |
| Q8I2A0                   | KIAA0319L | Dyslexia-associated protein KIAA0319-like protein                        | 46.127                 | 6.843     | -          | -          |
| Q9BY89                   | KIAA1671  | Uncharacterized protein KIAA1671                                         | 11.855                 | -         | -          | 3.720      |
| Q8IYS2                   | KIAA2013  | Uncharacterized protein KIAA2013                                         | 15.123                 | 12.476    | 5.251      | 1.776      |
| Q8NBE8                   | KLHL23    | Kelch-like protein 23                                                    | -                      | 6.208     | 71.826     | 3.902      |
| O43561                   | LAT       | Linker for activation of T-cells family member 1                         | 187908.497             | 63.993    | 3.797      | 1.762      |
| P06239                   | LCK       | Tyrosine-protein kinase Lck                                              | 12.933                 | 6.172     | 5.139      | 7.344      |
| Q9H400                   | LIME1     | Lck-interacting transmembrane adapter 1                                  | 7.288                  | 46.213    | 3.164      | 1.774      |
| Q9BU23                   | LMF2      | Lipase maturation factor 2                                               | 3.910                  | 6.622     | 3.242      | 1.954      |
| Q8IWU2                   | LMTK2     | Serine/threonine-protein kinase LMTK2                                    | -                      | -         | 41229.656  | 71665.214  |
| Q9UIQ6                   | LNPEP     | Leucyl-cystinyl aminopeptidase                                           | 14.444                 | 12.773    | 36.087     | 34.403     |
| A6NHZ5                   | LRRC14B   | Leucine-rich repeat-containing protein 14B                               | 125816.993             | -         | 596745.027 | -          |
| Q8N386                   | LRRC25    | Leucine-rich repeat-containing protein 25                                | 2083.333               | 10.011    | -          | 0.006      |
| Q86X29                   | LSR       | Lipolysis-stimulated lipoprotein receptor                                | 8823.529               | 16.367    | 6.268      | 246730.602 |
| Q9HBG7                   | LY9       | T-lymphocyte surface antigen Ly-9 (Fragment)                             | 17.835                 | 12.661    | 1112.116   | 263.819    |
| P20645                   | M6PR      | Cation-dependent mannose-6-phosphate receptor                            | 191.912                | 15.398    | 42.278     | 6.193      |
| Q68D91                   | MBLAC2    | Metallo-beta-lactamase domain-containing protein 2                       | 3.306                  | 14.241    | 6.148      | 4.158      |
| Q9P177                   | MDFIC     | MyoD family inhibitor domain-containing protein                          | 5.533                  | 12.627    | 4.676      | 1.605      |
| Q9NU22                   | MDN1      | Midasin                                                                  | 25.065                 | 67.282    | 9.693      | 3.263      |
| Q6ZSS7                   | MFSD6     | Major facilitator superfamily domain-containing protein 6                | 11.667                 | 7.250     | -          | 3.064      |
| Q14165                   | MLEC      | Malectin                                                                 | 11.773                 | 8.006     | 2.933      | 6.223      |
| Q9BR22                   | MNF1      | Mitochondrial nucleoid factor 1                                          | 17.190                 | 4.789     | 7.866      | -          |
| Q9NZW5                   | MPP6      | MAGUK p55 subfamily member 6                                             | 8.709                  | 28.581    | -          | -          |
| Q8N565                   | MREG      | Melanoregulin                                                            | -                      | 8.523     | -          | 100261.552 |
| P11836                   | MS4A1     | B-lymphocyte antigen CD20                                                | 25163.399              | 3522.173  | 8.018      | 50.366     |
| P03915                   | MT-ND5    | NADH-ubiquinone oxidoreductase chain 5                                   | 7.233                  | 15.824    | -          | 265911.072 |
| Q86UE4                   | MTDH      | Protein LYRIC                                                            | 12.010                 | 14.804    | 30.090     | 7.524      |
| Q13614                   | MTMR2     | Myotubularin-related protein 2                                           | -                      | -         | 4.141      | 46.800     |
| Q96S97                   | MYADM     | Myeloid-associated differentiation marker                                | 22.263                 | 19.697    | 6.033      | 2.386      |
| Q9NZM1                   | MYOF      | Myoferlin                                                                | -                      | 3.862     | 882459.313 | -          |
| P18440                   | NAT1      | Arylamine N-acetyltransferase 1                                          | 34.436                 | 13.664    | 3.826      | 3.514      |
| Q6PIU2                   | NCEH1     | Neutral cholesterol ester hydrolase 1                                    | 47.680                 | 11.400    | 2.938      | 3.385      |
| Q92542                   | NCSTN     | Nicastrin                                                                | 11.119                 | 5.394     | -          | -          |
| Q00653                   | NFKB2     | Nuclear factor NF-kappa-B p100 subunit                                   | 3.531                  | 6.372     | -          | 0.481      |
| O15118                   | NPC1      | Niemann-Pick C1 protein                                                  | 28.056                 | 18.593    | 12.593     | 1.762      |
| P01111                   | NRAS      | GTPase NRas                                                              | 1.141                  | 225.122   | 9.262      | 9.329      |
| Q96D31                   | ORA1      | Calcium release-activated calcium channel protein 1                      | 5.653                  | 7.887     | 4.778      | 1.339      |
| Q9NWU1                   | OXSM      | 3-oxoacyl-[acyl-carrier-protein] synthase, mitochondrial                 | 10.482                 | 8.820     | 4.231      | 2.806      |
| Q99572                   | P2RX7     | P2X purinoceptor 7                                                       | 270.915                | 8.496     | 12.676     | 27.384     |
| Q9NWW8                   | PAG1      | Phosphoprotein associated with glycosphingolipid-enriched microdomains 1 | 29.436                 | 4.952     | -          | 2.444      |
| Q9H6A9                   | PCNXL3    | Pecanex-like protein 3                                                   | -                      | -         | 15.078     | 8.928      |
| O00330                   | PDHX      | Pyruvate dehydrogenase protein X component, mitochondrial                | 40.106                 | 32.782    | 15.497     | 59.669     |
| P16284                   | PECAM1    | Platelet endothelial cell adhesion molecule                              | 18.342                 | 9.533     | 3.452      | 3.448      |
| Q9UPP1                   | PHF8      | Histone lysine demethylase PHF8                                          | -                      | -         | 3.306      | 26.652     |
| Q9BTU6                   | PI4K2A    | Phosphatidylinositol 4-kinase type 2-alpha                               | 3.908                  | 38.320    | 18.459     | -          |
| Q8TCG2                   | PI4K2B    | Phosphatidylinositol 4-kinase type 2-beta                                | 20.302                 | 14.882    | -          | -          |
| O15162                   | PLSCR1    | Phospholipid scramblase 1                                                | 1.440                  | 66.264    | 12.716     | 3.167      |
| Q9NRY6                   | PLSCR3    | Phospholipid scramblase 3                                                | 1225.490               | 41.608    | 9.342      | 16.931     |
| O15031                   | PLXNB2    | Plexin-B2                                                                | 15.556                 | 72.990    | 6.629      | 601.656    |
| A8CG34                   | POM121C   | Nuclear envelope pore membrane protein POM 121C                          | -                      | 131.827   | 11.703     | 4.520      |
| Q96T49                   | PPP1R16B  | Protein phosphatase 1 regulatory inhibitor subunit 16B                   | 184.232                | 29492.892 | 12.430     | 13.566     |
| P55345                   | PRMT2     | Protein arginine N-methyltransferase 2                                   | 4.007                  | 4.857     | 1.934      | 61.081     |
| Q9UNM6                   | PSMD13    | 26S proteasome non-ATPase regulatory subunit 13                          | 0.000                  | -         | 22.297     | 2310.375   |
| Q92530                   | PSMF1     | Proteasome inhibitor PI31 subunit                                        | -                      | -         | 5.559      | 4.234      |
| O43586                   | PSTPIP1   | Proline-serine-threonine phosphatase-interacting protein 1               | -                      | 3.762     | 0.197      | 4.761      |
| Q9P035                   | PTPLAD1   | Very-long-chain (3R)-3-hydroxyacyl-[acyl-carrier protein] dehydratase 3  | 10.735                 | 9.410     | 1.129      | 3.520      |

| UniProt Accession Number | Gene Name | Protein                                                           | Isotopic Ratio (n = 4) |            |          |            |
|--------------------------|-----------|-------------------------------------------------------------------|------------------------|------------|----------|------------|
|                          |           |                                                                   | Sample 1               | Sample 2   | Sample 3 | Sample 4   |
| P10114                   | RAP2A     | Ras-related protein Rap-2a                                        | 3.727                  | 130.236    | 14.792   | 6.700      |
| P61225                   | RAP2B     | Ras-related protein Rap-2b                                        | 3.833                  | 19308.296  | 14.937   | 10.410     |
| Q9Y3L5                   | RAP2C     | Ras-related protein Rap-2c                                        | 2.479                  | 639.720    | 7.125    | 6.103      |
| Q00765                   | REEP5     | Receptor expression-enhancing protein 5                           | 4.159                  | 12.816     | 6.463    | 1.794      |
| Q8IUW5                   | RELL1     | RELT-like protein 1                                               | -                      | -          | 31.204   | 2266.783   |
| Q8WZ73                   | RFFL      | E3 ubiquitin-protein ligase rifyflylin                            | 3.056                  | 1.607      | -        | 70.139     |
| Q14699                   | RFTN1     | Raftlin                                                           | 3.792                  | 2.561      | 9.400    | 5.896      |
| P22670                   | RFX1      | MHC class II regulatory factor RFX1                               | 38.538                 | 32.145     | 23.309   | 18.126     |
| Q9Y3C5                   | RNF11     | RING finger protein 11                                            | 4.858                  | 86.569     | -        | 3.240      |
| P10301                   | RRAS      | Ras-related protein R-Ras                                         | 10.564                 | 72.650     | 15.186   | 6.791      |
| P62070                   | RRAS2     | Ras-related protein R-Ras2                                        | 5.304                  | 21.033     | 9.208    | 4.193      |
| Q9NQC3                   | RTN4      | Reticulon-4                                                       | 0.985                  | 3.652      | 29.443   | -          |
| Q95977                   | S1PR4     | Sphingosine 1-phosphate receptor 4                                | 17.565                 | 16.749     | 11.729   | 10.976     |
| O15126                   | SCAMP1    | Secretory carrier-associated membrane protein 1                   | 6168.301               | 9.754      | 8.955    | 2.104      |
| O15127                   | SCAMP2    | Secretory carrier-associated membrane protein 2                   | 7.123                  | 553787.397 | 34.072   | 16.556     |
| O14828                   | SCAMP3    | Secretory carrier-associated membrane protein 3                   | 17.198                 | 24.507     | 9.436    | 10.253     |
| Q969E2                   | SCAMP4    | Secretory carrier-associated membrane protein 4                   | -                      | 6.431      | 4.282    | 5.013      |
| Q14108                   | SCARB2    | Lysosome membrane protein 2                                       | 17.279                 | 5.001      | 15.429   | 4.101      |
| Q14160                   | SCRIB     | Protein scribble homolog                                          | 99.755                 | 97.878     | 313.996  | 4.225      |
| Q9H190                   | SDCBP2    | Syntenin-2                                                        | -                      | 13.696     | 4.043    | -          |
| Q92854                   | SEMA4D    | Semaphorin-4D                                                     | 7.291                  | 3.690      | 3.156    | 1.812      |
| Q9NVA2                   | SEPT11    | Septin-11                                                         | 4.394                  | -          | 0.436    | 3.135      |
| Q9NRX5                   | SERINC1   | Serine incorporator 1                                             | 11928.105              | 2821.982   | 9.251    | 6.757      |
| Q8NBJ9                   | SIDT2     | SID1 transmembrane family member 2                                | -                      | 2312.752   | 2512.116 | 193548.387 |
| Q6IA17                   | SIGIRR    | Single Ig IL-1-related receptor                                   | 17.067                 | 28.687     | 108.391  | 11.404     |
| Q8N697                   | SLC15A4   | Solute carrier family 15 member 4                                 | 15.245                 | 8.513      | -        | 0.519      |
| O15427                   | SLC16A3   | Monocarboxylate transporter 4 (Fragment)                          | 17.206                 | 207.150    | 1.115    | 74803.836  |
| Q15758                   | SLC1A5    | Neutral amino acid transporter B(0)                               | 21.650                 | 21.918     | -        | 0.579      |
| Q6NXT4                   | SLC30A6   | Zinc transporter 6                                                | 4.221                  | -          | -        | 3.037      |
| Q8TB11                   | SLC35B2   | Adenosine 3'-phospho 5'-phosphosulfate transporter 1              | 665.278                | 9.304      | 6.029    | 1.265      |
| Q96K37                   | SLC35E1   | Solute carrier family 35 member E1                                | -                      | 8.517      | 4.188    | 1.384      |
| POCK96                   | SLC35E2B  | Solute carrier family 35 member E2B                               | 2.208                  | 23.806     | 10.210   | 9.747      |
| Q96GZ6                   | SLC41A3   | Solute carrier family 41 member 3                                 | 35130.719              | 365.372    | 14.998   | -          |
| Q8WWI5                   | SLC44A1   | Choline transporter-like protein 1                                | 48.611                 | 135.901    | 3.703    | 4.678      |
| Q8IWA5                   | SLC44A2   | Choline transporter-like protein 2                                | 7.936                  | 13.081     | 8.130    | 3.221      |
| Q92581-2                 | SLC9A6    | Isoform 2 of Sodium/hydrogen exchanger 6                          | 94.853                 | 33.609     | -        | -          |
| Q8IVB4                   | SLC9A9    | Sodium/hydrogen exchanger 9                                       | 3.144                  | 6.238      | -        | 74.045     |
| Q9UIG8                   | SLCO3A1   | Solute carrier organic anion transporter family member 3A1        | 112.337                | 9.221      | 8.065    | 8.401      |
| B2RUZ4                   | SMIM1     | Small integral membrane protein 1                                 | 5.625                  | 24.655     | -        | -          |
| Q9NY59                   | SMPD3     | Sphingomyelin phosphodiesterase 3                                 | -                      | -          | 206.257  | 8.690      |
| O00161                   | SNAP23    | Synaptosomal-associated protein 23                                | 3.945                  | 24.507     | 3.678    | 1.500      |
| Q99523                   | SORT1     | Sortilin                                                          | 12.312                 | -          | -        | 5.745      |
| Q8TCT8                   | SPPL2A    | Signal peptide peptidase-like 2A                                  | 16.160                 | 16.979     | -        | 47.193     |
| Q9NUV7                   | SPTLC3    | Serine palmitoyltransferase 3 (Fragment)                          | -                      | -          | 6.618    | 201.918    |
| O95772                   | STAR3NL   | MLN64 N-terminal domain homolog                                   | 12.361                 | 250.371    | -        | 10.113     |
| O75716                   | STK16     | Serine/threonine-protein kinase 16                                | 1478.758               | 108.254    | 7.595    | 11.526     |
| P27105                   | STOM      | Erythrocyte band 7 integral membrane protein                      | 165.278                | 1044.133   | 8.759    | 22.816     |
| O75558                   | STX11     | Syntaxin-11                                                       | 12.075                 | 53.236     | 8.065    | 5.073      |
| Q86Y82                   | STX12     | Syntaxin-12                                                       | 14.322                 | 109.209    | -        | -          |
| O43752                   | STX6      | Syntaxin-6                                                        | 214869.281             | 44.367     | -        | 3.331      |
| O15400                   | STX7      | Syntaxin-7                                                        | 49.747                 | 14.613     | -        | 1.539      |
| Q9UNK0                   | STX8      | Syntaxin-8                                                        | 7.025                  | 205.389    | 3.001    | 0.004      |
| O15260                   | SURF4     | Surfeit locus protein 4                                           | 20.278                 | 10.004     | -        | 4.028      |
| Q96L08                   | SUSD3     | Sushi domain-containing protein 3                                 | 16.585                 | 69.361     | -        | -          |
| Q62M23                   | SYNE3     | Nesprin-3                                                         | 8.374                  | 8.491      | 2.970    | -          |
| Q6NXT6                   | TAPT1     | Transmembrane anterior posterior transformation protein 1 homolog | 3.248                  | 24.273     | -        | 1.681      |
| Q96BS2                   | TESC      | Calcineurin B homologous protein 3                                | -                      | 14.348     | 7.617    | 4.621      |
| P02786                   | TFRC      | Transferrin receptor protein 1                                    | 39.444                 | 6.556      | 3.054    | 3.011      |
| Q8WUY1                   | THEM6     | Protein THEM6                                                     | -                      | 3.624      | -        | 4.339      |
| Q99805                   | TM9SF2    | Transmembrane 9 superfamily member 2                              | 8.391                  | 8.856      | -        | 0.105      |
| Q72403                   | TMC6      | Transmembrane channel-like protein 6                              | 12.516                 | 25.992     | 8.995    | 0.244      |
| Q8IU68                   | TMC8      | Transmembrane channel-like protein 8                              | 45.931                 | 26.374     | 6.391    | 3.324      |
| Q13445                   | TMED1     | Transmembrane emp24 domain-containing protein 1                   | 18.096                 | 73.923     | 5.367    | 4.681      |
| Q9H6X4                   | TMEM134   | Transmembrane protein 134                                         | 1.064                  | 16.389     | 8.705    | 4.991      |
| Q727N9                   | TMEM179B  | Transmembrane protein 179B                                        | 14.967                 | 11.301     | -        | -          |
| Q8IY95                   | TMEM192   | Transmembrane protein 192                                         | -                      | 3.178      | 3.732    | 10.846     |
| Q9HOR3                   | TMEM222   | Transmembrane protein 222                                         | 4.748                  | 39.784     | 23.656   | 15.057     |
| Q9H330                   | TMEM245   | Transmembrane protein 245                                         | 13.750                 | 19.669     | 2.680    | 15.327     |
| Q86T03                   | TMEM55B   | Transmembrane protein 55B                                         | 3.379                  | 77.742     | 8.817    | 5.319      |
| Q94886                   | TMEM63A   | Transmembrane protein 63A                                         | 10.637                 | 14.564     | 11.653   | 12.912     |
| Q8NBN3                   | TMEM87A   | Transmembrane protein 87A                                         | 8.116                  | 22.597     | -        | -          |
| Q96BF3                   | TMIGD2    | Transmembrane and immunoglobulin domain-containing protein 2      | 7.117                  | -          | -        | 15.580     |
| Q6ZT21                   | TMPEPE    | Transmembrane protein with metallophosphoesterase domain          | 36.765                 | 46.552     | 6.459    | 3.385      |
| Q9H3N1                   | TMX1      | Thioredoxin-related transmembrane protein 1                       | 31.585                 | 43.178     | 1.646    | 13.112     |
| Q96JJ7                   | TMX3      | Protein disulfide-isomerase TMX3                                  | 11.095                 | 95.353     | -        | 8.797      |
| Q9H1E5                   | TMX4      | Thioredoxin-related transmembrane protein 4                       | 16.716                 | 18.027     | 19.533   | 9.547      |
| O43557                   | TNFSF14   | Tumor necrosis factor ligand superfamily member 14                | 3.246                  | 21.727     | 6.058    | 5.359      |
| Q9Y228                   | TRAF3IP3  | TRAF3-interacting JNK-activating modulator                        | 10.376                 | 40.632     | 3.675    | 1.888      |
| Q86YW5                   | TREML1    | Trem-like transcript 1 protein                                    | 10.539                 | 4.572      | -        | -          |
| P49815                   | TSC2      | Tuberin                                                           | -                      | -          | 9.013    | 13.662     |
| Q96SJ8                   | TSPAN18   | Tetraspanin-18 (Fragment)                                         | -                      | -          | 7.443    | 64.455     |
| Q86UF1                   | TSPAN33   | Tetraspanin-33                                                    | 4.571                  | 23.149     | 22.278   | 12.214     |
| O75954                   | TSPAN9    | Tetraspanin-9                                                     | -                      | 20.059     | -        | 3.799      |
| Q9C0H2                   | TTYH3     | Protein tweety homolog 3                                          | 10.621                 | 24.867     | -        | 0.653      |
| O75385                   | ULK1      | Serine/threonine-protein kinase ULK1                              | -                      | 925100.785 | 6.691    | 1482.127   |
| P63027                   | VAMP2     | Vesicle-associated membrane protein 2                             | 15.139                 | 2.028      | -        | 4.365      |
| Q15836                   | VAMP3     | Vesicle-associated membrane protein 3                             | 6.937                  | 151.538    | -        | -          |
| O75379                   | VAMP4     | Vesicle-associated membrane protein 4                             | 13.039                 | 10.586     | -        | 1.520      |
| Q8IUH5                   | ZDHHC17   | Palmitoyltransferase ZDHHC17                                      | -                      | 486.314    | -        | 5.846      |
| Q9NUE0                   | ZDHHC18   | Palmitoyltransferase ZDHHC18                                      | 5.221                  | 630171.865 | 273.743  | 13.662     |
| Q5W0Z9                   | ZDHHC20   | Probable palmitoyltransferase ZDHHC20                             | 13.603                 | 5.752      | 4.116    | 9.468      |
| Q9C0B5                   | ZDHHC5    | Palmitoyltransferase ZDHHC5                                       | 7.673                  | 22.321     | 5.454    | 0.930      |

Supplementary Table 2

The T-cell palmitome, proteins identified as palmitoylated in our study and/or two previous studies in Jurkat T cells. Proteins identified as palmitoylated only in our study are highlighted in blue. Proteins identified as palmitoylated in both previous studies, but not our study, are highlighted in yellow. \*Palmitoylation sites predicted using CSS-Palm (version 3.0), with a "High" threshold and a cutoff score of 1.0. <sup>b</sup>Prediction of transmembrane domains was performed using TMHMM Server (version 2.0). <sup>c</sup>References: [1] Martin and Cravatt, Nat. Meth., 2009, [2] Dowal et al., Blood, 2011, [3] Merrick et al., Mol. & Cell. Proteom., 2011, [4] Yang et al., Mol. & Cell. Proteom., 2010, [5] Marin et al., Circ. Res., 2012, [6] Forrester et al., J. Lip. Res., 2011, [7] Wilson et al., Mol. & Cell. Proteom., 2011, [8] Kang et al., Nature, 2008.

| UniProt Accession Number | Gene Name | Protein                                                              | Enriched in Jurkat T cells | Enriched in Primary T cells | Enriched in Martin et al. 2009 | Enriched in Wilson et al. 2011 | Predicted Palmitoylation Sites <sup>a</sup> | Predicted Transmembrane Helices <sup>b</sup> | Literature References <sup>c</sup> |
|--------------------------|-----------|----------------------------------------------------------------------|----------------------------|-----------------------------|--------------------------------|--------------------------------|---------------------------------------------|----------------------------------------------|------------------------------------|
| Q9NP58                   | ABC6      | ATP-binding cassette sub-family B member 6, mitochondrial            | +                          | -                           | -                              | -                              | 0                                           | 9                                            | [2]                                |
| O15439                   | ABCC4     | Multidrug resistance-associated protein 4                            | -                          | +                           | -                              | -                              | 2                                           | 11                                           | [2]                                |
| P28288                   | ABCD3     | ATP-binding cassette sub-family D member 3                           | -                          | -                           | +                              | -                              | 0                                           | 3                                            | [1]                                |
| O95870                   | ABHD16A   | Abhydrolase domain-containing protein 16A                            | -                          | +                           | +                              | -                              | 1                                           | 2                                            | [1], [8]                           |
| Q96G56                   | ABHD17A   | Alpha/beta hydrolase domain-containing protein 17A                   | +                          | +                           | +                              | -                              | 4                                           | 0                                            | [1]                                |
| Q5V576                   | ABHD17B   | Alpha/beta hydrolase domain-containing protein 17B                   | +                          | +                           | +                              | +                              | 4                                           | 0                                            | [1], [3], [7]                      |
| Q6PC86                   | ABHD17C   | Alpha/beta hydrolase domain-containing protein 17C                   | -                          | -                           | +                              | -                              | 1                                           | 0                                            | [1]                                |
| P09110                   | ACAA1     | 3-ketoacyl-CoA thiolase, peroxisomal                                 | +                          | +                           | -                              | -                              | 0                                           | 0                                            | -                                  |
| Q9H845                   | ACAD9     | Acyl-CoA dehydrogenase family member 9, mitochondrial                | -                          | -                           | +                              | -                              | 2                                           | 0                                            | [1]                                |
| P24752                   | ACAT1     | Acetyl-CoA acetyltransferase, mitochondrial                          | +                          | +                           | -                              | -                              | 0                                           | 0                                            | -                                  |
| Q9BWD1                   | ACAT2     | Acetyl-CoA acetyltransferase, cytosolic                              | +                          | +                           | -                              | -                              | 2                                           | 0                                            | -                                  |
| O14734                   | ACOT8     | Acyl-coenzyme A thioesterase 8                                       | -                          | -                           | -                              | -                              | 0                                           | 0                                            | -                                  |
| P33121                   | ACSL1     | Long-chain-fatty-acyl-CoA ligase 1                                   | -                          | +                           | -                              | -                              | 0                                           | 1                                            | -                                  |
| O95573                   | ACSL3     | Long-chain-fatty-acyl-CoA ligase 3                                   | -                          | -                           | +                              | -                              | 0                                           | 1                                            | [1]                                |
| P68133                   | ACTA1     | Actin, alpha skeletal muscle                                         | -                          | -                           | +                              | +                              | 1                                           | 0                                            | [1], [7]                           |
| P62736                   | ACTA2     | Actin, aortic smooth muscle                                          | -                          | -                           | +                              | -                              | 2                                           | 0                                            | [5]                                |
| P60709                   | ACTB      | Actin, cytoplasmic 1                                                 | -                          | -                           | +                              | +                              | 1                                           | 0                                            | [4], [5], [7]                      |
| P68032                   | ACTC1     | Actin, alpha cardiac muscle 1                                        | -                          | -                           | +                              | -                              | 1                                           | 0                                            | [1]                                |
| P63267                   | ACTG2     | Actin, gamma-enteric smooth muscle                                   | -                          | -                           | +                              | -                              | 2                                           | 0                                            | [5]                                |
| O43707                   | ACTN4     | Alpha-actinin-4                                                      | -                          | +                           | -                              | -                              | 0                                           | 0                                            | [4], [5]                           |
| O14672                   | ADAM10    | Disintegrin and metalloproteinase domain-containing protein 10       | -                          | +                           | +                              | -                              | 2                                           | 1                                            | [1], [8]                           |
| P78536                   | ADAM17    | Disintegrin and metalloproteinase domain-containing protein 17       | +                          | +                           | -                              | -                              | 4                                           | 1                                            | [3]                                |
| O43306                   | ADCY6     | Adenylate cyclase type 6                                             | -                          | +                           | -                              | -                              | 0                                           | 12                                           | [2], [8]                           |
| P51828                   | ADCY7     | Adenylate cyclase type 7                                             | +                          | +                           | -                              | -                              | 4                                           | 12                                           | -                                  |
| Q99943                   | AGPAT1    | 1-acyl-sn-glycerol-3-phosphate acyltransferase alpha                 | +                          | +                           | +                              | -                              | 0                                           | 3                                            | [1], [3], [8]                      |
| Q9NUQ2                   | AGPAT5    | 1-acyl-sn-glycerol-3-phosphate acyltransferase epsilon               | -                          | +                           | -                              | -                              | 1                                           | 3                                            | -                                  |
| P43353                   | ALDH3B1   | Aldehyde dehydrogenase family 3 member B1                            | -                          | +                           | -                              | -                              | 2                                           | 0                                            | [3]                                |
| Q02252                   | ALDH6A1   | Methylmalonate-semialdehyde dehydrogenase [acylating], mitochondrial | +                          | +                           | -                              | -                              | 1                                           | 1                                            | -                                  |
| P04075                   | ALDOA     | Fructose-bisphosphate aldolase A                                     | -                          | -                           | +                              | -                              | 0                                           | 0                                            | [1], [6]                           |
| Q86Y79                   | AMICA1    | Junctional adhesion molecule-like                                    | -                          | +                           | -                              | -                              | 2                                           | 1                                            | -                                  |
| Q4KM02                   | ANO6      | Anoctamin-6                                                          | -                          | -                           | -                              | -                              | 1                                           | 8                                            | [1]                                |
| Q9HGX2                   | ANTXR1    | Anthrax toxin receptor 1                                             | +                          | +                           | +                              | -                              | 4                                           | 1                                            | [1]                                |
| P58335                   | ANTXR2    | Anthrax toxin receptor 2                                             | -                          | +                           | +                              | -                              | 5                                           | 1                                            | [5]                                |
| P08133                   | ANXA6     | Annexin A6                                                           | -                          | -                           | -                              | +                              | 1                                           | 0                                            | [7]                                |
| Q63HQ0                   | AP1AR     | AP-1 complex-associated regulatory protein                           | +                          | +                           | +                              | -                              | 3                                           | 0                                            | [1]                                |
| O43747                   | AP1G1     | AP-1 complex subunit gamma-1                                         | -                          | -                           | +                              | -                              | 0                                           | 0                                            | [1]                                |
| Q98Z25                   | API5      | Apoptosis inhibitor 5                                                | -                          | -                           | +                              | -                              | 0                                           | 0                                            | [5]                                |
| P84077                   | ARF1      | ADP-ribosylation factor 1                                            | -                          | -                           | -                              | +                              | 0                                           | 0                                            | [1], [7]                           |
| P61204                   | ARF3      | ADP-ribosylation factor 3                                            | -                          | -                           | +                              | -                              | 0                                           | 0                                            | [1]                                |
| P18085                   | ARF4      | ADP-ribosylation factor 4                                            | -                          | -                           | -                              | +                              | 0                                           | 0                                            | [5], [7], [8]                      |
| P84085                   | ARF5      | ADP-ribosylation factor 5                                            | -                          | -                           | -                              | +                              | 0                                           | 0                                            | [2], [7], [8]                      |
| Q35X18                   | ARL13B    | ADP-ribosylation factor-like protein 13B                             | -                          | -                           | +                              | +                              | 2                                           | 0                                            | [1]                                |
| Q9NXU5                   | ARL15     | ADP-ribosylation factor-like protein 15                              | +                          | +                           | +                              | -                              | 0                                           | 0                                            | [1], [2], [3], [8]                 |
| Q8N655                   | ARL6IP6   | ADP-ribosylation factor-like protein 6-interacting protein 6         | -                          | +                           | +                              | -                              | 1                                           | 3                                            | [1]                                |
| P98196                   | ATP11A    | Probable phospholipid-transporting ATPase 11H                        | -                          | -                           | +                              | -                              | 3                                           | 7                                            | [4]                                |
| Q9Y263                   | ATP11B    | Probable phospholipid-transporting ATPase 11F                        | +                          | +                           | +                              | -                              | 4                                           | 8                                            | [1], [2]                           |
| Q8N849                   | ATP11C    | Probable phospholipid-transporting ATPase 11G                        | -                          | +                           | -                              | -                              | 0                                           | 7                                            | -                                  |
| Q9H7F0                   | ATP13A3   | Probable cation-transporting ATPase 13A3                             | -                          | -                           | +                              | -                              | 2                                           | 10                                           | [1]                                |
| P05023                   | ATP1A1    | Sodium/potassium-transporting ATPase subunit alpha-1                 | -                          | -                           | +                              | -                              | 0                                           | 10                                           | [1], [2], [4], [6]                 |
| P13637                   | ATP1A3    | Sodium/potassium-transporting ATPase subunit alpha-3                 | -                          | -                           | +                              | -                              | 0                                           | 8                                            | [1]                                |
| Q93084                   | ATP2A3    | Sarcoplasmic/endoplasmic reticulum calcium ATPase 3                  | -                          | -                           | +                              | -                              | 1                                           | 7                                            | [1]                                |
| P23634                   | ATP2B4    | Plasma membrane calcium-transporting ATPase 4                        | -                          | -                           | +                              | -                              | 0                                           | 8                                            | [1]                                |
| P25705                   | ATP5A1    | ATP synthase subunit alpha, mitochondrial                            | -                          | -                           | -                              | +                              | 0                                           | 0                                            | [5], [7]                           |
| P36542                   | ATP5C1    | ATP synthase subunit gamma, mitochondrial                            | -                          | -                           | +                              | -                              | 0                                           | 0                                            | [1], [6]                           |
| P48047                   | ATP5O     | ATP synthase subunit O, mitochondrial                                | -                          | -                           | +                              | -                              | 0                                           | 0                                            | [1], [8]                           |
| Q9Y487                   | ATP6VOA2  | V-type proton ATPase 116 kDa subunit a isoform 2                     | +                          | +                           | +                              | -                              | 1                                           | 6                                            | [1], [2]                           |
| O43861                   | ATP9B     | Probable phospholipid-transporting ATPase 11B                        | -                          | +                           | +                              | -                              | 1                                           | 0                                            | [1]                                |
| O75882                   | ATRN      | Attractin                                                            | +                          | +                           | -                              | -                              | 4                                           | 1                                            | [8]                                |
| Q9Y679                   | AUP1      | Ancient ubiquitous protein 1                                         | -                          | +                           | +                              | -                              | 1                                           | 2                                            | [1]                                |
| Q9Y679-3                 | AUP1      | Ancient ubiquitous protein 1 (isoform 3)                             | -                          | +                           | +                              | -                              | 1                                           | 0                                            | -                                  |
| O43505                   | B3GNT1    | N-acetylgalactosaminide beta-1,3-N-acetylglucosaminyltransferase     | +                          | +                           | +                              | -                              | 1                                           | 1                                            | [1]                                |
| P15291                   | B4GALT1   | Beta-1,4-galactosyltransferase 1                                     | +                          | +                           | +                              | -                              | 1                                           | 1                                            | [1]                                |
| Q9UBV7                   | B4GALT7   | Beta-1,4-galactosyltransferase 7                                     | +                          | +                           | +                              | -                              | 1                                           | 1                                            | [1]                                |
| Q9HB09                   | BCL2L12   | Bcl-2-like protein 12                                                | +                          | +                           | -                              | -                              | 0                                           | 0                                            | -                                  |
| O15155                   | BET1      | BET1 homolog                                                         | -                          | +                           | -                              | -                              | 0                                           | 1                                            | [2]                                |
| Q9NYM9                   | BET1L     | BET1-like protein                                                    | +                          | +                           | -                              | -                              | 0                                           | 1                                            | [2]                                |
| Q10589                   | BST2      | Bone marrow stromal antigen 2                                        | -                          | +                           | +                              | -                              | 2                                           | 1                                            | -                                  |
| Q9V622                   | BZW2      | Basic leucine zipper and W2 domain-containing protein 2              | -                          | -                           | +                              | -                              | 0                                           | 0                                            | [1]                                |
| Q07021                   | C1QB      | Complement component 1 Q subcomponent-binding protein, mitochondrial | -                          | -                           | +                              | +                              | 0                                           | 0                                            | [2], [5], [7]                      |
| Q8N357                   | C2orf18   | Solute carrier family 35 member F6                                   | -                          | +                           | -                              | -                              | 0                                           | 10                                           | -                                  |
| Q6P1X6                   | C8orf82   | UPF0598 protein C8orf82                                              | +                          | +                           | -                              | -                              | 1                                           | 0                                            | [2]                                |
| Q9HA72                   | CALHM2    | Calcium homeostasis modulator protein 2                              | +                          | +                           | +                              | +                              | 1                                           | 4                                            | -                                  |
| P27824                   | CANX      | Calnexin                                                             | +                          | +                           | +                              | +                              | 2                                           | 1                                            | [1], [3], [5], [7], [8]            |
| O15484                   | CAPN5     | Calpain-5                                                            | -                          | +                           | -                              | -                              | 1                                           | 0                                            | [4], [5], [8]                      |
| Q14444                   | CAPRIN1   | Caprin-1                                                             | -                          | -                           | +                              | -                              | 0                                           | 0                                            | [1]                                |
| P83916                   | CBX1      | Chromobox protein homolog 1                                          | -                          | -                           | +                              | -                              | 0                                           | 0                                            | [1]                                |
| Q13185                   | CBX3      | Chromobox protein homolog 3                                          | -                          | -                           | +                              | -                              | 1                                           | 0                                            | [1]                                |
| A6N179                   | CDC69     | Coiled-coil domain-containing protein 69                             | -                          | +                           | +                              | -                              | 1                                           | 0                                            | -                                  |
| Q8ND76                   | CENY      | Cyclin-Y                                                             | +                          | +                           | +                              | -                              | 2                                           | 0                                            | [1], [2], [3]                      |
| Q8ND76-3                 | CENY      | Cyclin-Y (isoform 3)                                                 | +                          | +                           | -                              | -                              | 0                                           | 0                                            | -                                  |
| Q8N7R7                   | CCNYL1    | Cyclin-Y-like protein 1                                              | -                          | +                           | +                              | -                              | 2                                           | 0                                            | [1]                                |
| P51681                   | CCRS5     | C-C chemokine receptor type 5                                        | -                          | +                           | +                              | -                              | 4                                           | 6                                            | -                                  |
| P78371                   | CCT2      | T-complex protein 1 subunit beta                                     | -                          | -                           | +                              | +                              | 1                                           | 0                                            | [1], [7]                           |
| P49368                   | CCT3      | T-complex protein 1 subunit gamma                                    | -                          | -                           | -                              | +                              | 0                                           | 0                                            | [7]                                |
| P50991                   | CCT4      | T-complex protein 1 subunit delta                                    | -                          | -                           | -                              | +                              | 0                                           | 0                                            | [7]                                |
| P48643                   | CCT5      | T-complex protein 1 subunit epsilon                                  | -                          | -                           | +                              | +                              | 0                                           | 0                                            | [1], [5], [7]                      |
| P40227                   | CCT6A     | T-complex protein 1 subunit zeta                                     | -                          | -                           | -                              | +                              | 0                                           | 0                                            | [5], [7]                           |
| P50990                   | CCT8      | T-complex protein 1 subunit theta                                    | -                          | -                           | -                              | +                              | 1                                           | 0                                            | [5], [7]                           |
| P48509                   | CD151     | CD151 antigen                                                        | -                          | +                           | +                              | -                              | 7                                           | 4                                            | [2], [6]                           |
| P06126                   | CD1A      | T-cell surface glycoprotein CD1a                                     | -                          | -                           | +                              | -                              | 2                                           | 0                                            | [1]                                |
| P29017                   | CD1C      | T-cell surface glycoprotein CD1c                                     | +                          | -                           | -                              | -                              | 1                                           | 1                                            | -                                  |
| Q8TD46                   | CD200R1   | Cell surface glycoprotein CD200 receptor 1                           | -                          | +                           | -                              | -                              | 1                                           | 2                                            | -                                  |
| P26842                   | CD27      | CD27 antigen                                                         | -                          | -                           | -                              | -                              | 1                                           | 1                                            | -                                  |
| P16671                   | CD36      | Platelet glycoprotein 4 (Fragment)                                   | -                          | +                           | -                              | -                              | 4                                           | 2                                            | [2], [3]                           |
| P11049                   | CD37      | Leukocyte antigen CD37                                               | -                          | +                           | -                              | -                              | 4                                           | 4                                            | -                                  |
| P28907                   | CD38      | ADP-ribosyl cyclase 1                                                | +                          | +                           | +                              | -                              | 2                                           | 1                                            | [1], [2], [4], [8]                 |
| P04234                   | CD3D      | T-cell surface glycoprotein CD3 delta chain                          | -                          | +                           | +                              | -                              | 0                                           | 0                                            | [1]                                |
| P01730                   | CD4       | T-cell surface glycoprotein CD4                                      | -                          | +                           | +                              | -                              | 3                                           | 1                                            | [1]                                |
| P16070                   | CD44      | CD44 antigen (Fragment)                                              | -                          | +                           | -                              | -                              | 2                                           | 1                                            | [3], [5]                           |
| P06127                   | CD5       | T-cell surface glycoprotein CD5                                      | +                          | +                           | +                              | -                              | 2                                           | 1                                            | [1]                                |
| P19397                   | CD53      | Leukocyte surface antigen CD53                                       | +                          | +                           | +                              | -                              | 4                                           | 4                                            | -                                  |
| P08962                   | CD63      | CD63 antigen                                                         | +                          | +                           | -                              | -                              | 7                                           | 4                                            | [2], [5]                           |
| P09564                   | CD7       | T-cell antigen CD7                                                   | +                          | +                           | +                              | -                              | 2                                           | 1                                            | -                                  |
| P21854                   | CD72      | B-cell differentiation antigen CD72                                  | -                          | +                           | +                              | -                              | 2                                           | 1                                            | -                                  |
| P27701                   | CD82      | CD82 antigen                                                         | +                          | +                           | +                              | +                              | 5                                           | 4                                            | [1], [2], [5], [7]                 |
| Q01151                   | CD83      | CD83 antigen                                                         | -                          | +                           | -                              | -                              | 0                                           | 1                                            | -                                  |
| P21926                   | CD9       | CD9 antigen                                                          | -                          | +                           | -                              | -                              | 6                                           | 4                                            | [5]                                |
| P40200                   | CD96      | T-cell surface protein tactile                                       | -                          | +                           | -                              | -                              | 1                                           | 1                                            | -                                  |
| P48960-2                 | CD97      | CD97 antigen (isoform 2)                                             | +                          | +                           | -                              | -                              | 0                                           | 7                                            | -                                  |
| P48960                   | CD97      | CD97 antigen                                                         | -                          | +                           | -                              | -                              | 0                                           | 7                                            | -                                  |
| P14209                   | CD99      | CD99 antigen                                                         | +                          | +                           | -                              | -                              | 0                                           | 2                                            | [4]                                |
| Q8TC22                   | CD99L2    | CD99 antigen-like protein 2                                          | -                          | +                           | -                              | -                              | 1                                           | 1                                            | [5], [6]                           |
| Q9NRR3                   | CDC42SE2  | CDC42 small effector protein 2                                       | -                          | -                           | +                              | -                              | 3                                           | 0                                            | [2], [8]                           |



| UniProt Accession Number | Gene Name | Protein                                                                     | Enriched in Jurkat T cells | Enriched in Primary T cells | Enriched in Martin et al. 2009 | Enriched in Wilson et al. 2011 | Predicted Palmitoylation Sites <sup>a</sup> | Predicted Transmembrane Helices <sup>b</sup> | Literature References <sup>c</sup> |
|--------------------------|-----------|-----------------------------------------------------------------------------|----------------------------|-----------------------------|--------------------------------|--------------------------------|---------------------------------------------|----------------------------------------------|------------------------------------|
| Q5V42                    | CDKAL1    | Threonylcarbamoyladenosine tRNA methyltransferase                           | -                          | +                           | -                              | -                              | 1                                           | 1                                            | -                                  |
| Q96G23                   | CERS2     | Ceramide synthase 2                                                         | -                          | -                           | +                              | -                              | 0                                           | 5                                            | [1]                                |
| P23528                   | CFL1      | Cofilin-1                                                                   | -                          | -                           | -                              | +                              | 0                                           | 0                                            | [5], [7]                           |
| Q14839                   | CHD4      | Chromodomain-helicase-DNA-binding protein 4                                 | -                          | -                           | +                              | -                              | 0                                           | 0                                            | [1]                                |
| Q9NPF2                   | CHST11    | Carbohydrate sulfotransferase 11                                            | +                          | -                           | -                              | -                              | 1                                           | 1                                            | [1]                                |
| Q07065                   | CKAP4     | Cytoskeleton-associated protein 4                                           | +                          | +                           | -                              | -                              | 1                                           | 1                                            | [3], [4], [5]                      |
| Q9NY35                   | CLDN11    | Claudin domain-containing protein 1                                         | -                          | +                           | -                              | -                              | 2                                           | 4                                            | -                                  |
| O14967                   | CLGN      | Calmequin                                                                   | +                          | -                           | +                              | -                              | 1                                           | 1                                            | [1]                                |
| O00299                   | CLIC1     | Chloride intracellular channel protein 1                                    | -                          | -                           | -                              | +                              | 0                                           | 0                                            | [7]                                |
| Q96D25                   | CUP3      | CAP-Gly domain-containing linker protein 3                                  | -                          | -                           | -                              | -                              | 2                                           | 0                                            | [8]                                |
| Q00610                   | CLTC      | Clathrin heavy chain 1                                                      | -                          | -                           | +                              | +                              | 0                                           | 0                                            | [1], [7]                           |
| A5YK66                   | CNOT1     | CCR4-NOT transcription complex subunit 1                                    | -                          | -                           | +                              | -                              | 3                                           | 0                                            | [1]                                |
| Q6PJW8                   | CNST      | Consortin                                                                   | +                          | +                           | -                              | -                              | 2                                           | 1                                            | -                                  |
| Q86VU5                   | COMT1     | Catechol O-methyltransferase domain-containing protein 1 (Fragment)         | -                          | +                           | -                              | -                              | 0                                           | 1                                            | [2]                                |
| P53621                   | COPA      | Coatomer subunit alpha                                                      | -                          | -                           | +                              | -                              | 0                                           | 0                                            | [1]                                |
| P31146                   | CORO1A    | Coronin-1A                                                                  | -                          | -                           | -                              | +                              | 0                                           | 0                                            | [7]                                |
| Q9UI42                   | CPA4      | Carboxypeptidase A4                                                         | +                          | -                           | -                              | -                              | 0                                           | 0                                            | -                                  |
| O75976                   | CPD       | Carboxypeptidase D                                                          | -                          | -                           | +                              | -                              | 3                                           | 1                                            | [1], [8]                           |
| P50416                   | CPT1A     | Carnitine O-palmitoyltransferase 1, liver isoform                           | -                          | -                           | -                              | -                              | 0                                           | 2                                            | [1]                                |
| P55060                   | CSE1L     | Exportin-2                                                                  | -                          | -                           | +                              | -                              | 0                                           | 0                                            | [1]                                |
| Q9HCP0                   | CSNK1G1   | Casein kinase 1 isoform gamma-1                                             | +                          | +                           | -                              | -                              | 3                                           | 0                                            | [1], [2], [8]                      |
| P78368                   | CSNK1G2   | Casein kinase 1 isoform gamma-2                                             | +                          | +                           | -                              | -                              | 3                                           | 0                                            | [8]                                |
| Q9Y6M4                   | CSNK1G3   | Casein kinase 1 isoform gamma-3                                             | -                          | +                           | +                              | -                              | 3                                           | 0                                            | [1], [2], [8]                      |
| Q9Y6M4-3                 | CSNK1G3   | Casein kinase 1 isoform gamma-3 (Isoform 3)                                 | +                          | -                           | -                              | -                              | 3                                           | 0                                            | -                                  |
| Q9GZU7                   | CTDSP1    | Carboxy-terminal domain RNA polymerase II polypeptide A small phosphatase 1 | -                          | +                           | +                              | -                              | 0                                           | 0                                            | [1]                                |
| Q9GZU7-2                 | CTDSP1    | Carboxy-terminal domain RNA polymerase II polypeptide A small phosphatase 1 | +                          | +                           | -                              | -                              | 0                                           | 0                                            | -                                  |
| O14595                   | CTDSP2    | Carboxy-terminal domain RNA polymerase II polypeptide A small phosphatase 2 | -                          | +                           | -                              | -                              | 0                                           | 0                                            | -                                  |
| P78310-2                 | CXADR     | Coxsackievirus and adenovirus receptor                                      | +                          | +                           | -                              | -                              | 2                                           | 1                                            | -                                  |
| P61073                   | CXCR4     | C-X-C chemokine receptor type 4                                             | -                          | -                           | +                              | -                              | 1                                           | 7                                            | [1]                                |
| O43169                   | CYB5B     | Cytochrome b5 type B                                                        | -                          | -                           | -                              | +                              | 0                                           | 1                                            | [2], [5], [7], [8]                 |
| P00387                   | CYB5R3    | NADH-cytochrome b5 reductase 3                                              | -                          | -                           | +                              | -                              | 0                                           | 0                                            | [1], [8]                           |
| P04839                   | CYBB      | Cytochrome b-245 heavy chain                                                | -                          | +                           | -                              | -                              | 2                                           | 4                                            | [3]                                |
| Q9Y4D1                   | DAAM1     | Dishevelled-associated activator of morphogenesis 1                         | +                          | +                           | +                              | -                              | 1                                           | 0                                            | [1], [2], [8]                      |
| P61803                   | DAD1      | Dolichyl-diphosphooligosaccharide-protein glycosyltransferase subunit DAD1  | -                          | -                           | -                              | -                              | 0                                           | 3                                            | [1]                                |
| Q8NCG7                   | DAGLB     | Sn1-specific diacylglycerol lipase beta                                     | +                          | +                           | -                              | -                              | 3                                           | 4                                            | [1], [2], [3]                      |
| Q8IWE4                   | DCUN1D3   | DCN1-like protein 3                                                         | +                          | +                           | -                              | -                              | 2                                           | 0                                            | -                                  |
| Q16531                   | DDB1      | DNA damage-binding protein 1                                                | -                          | -                           | -                              | +                              | 0                                           | 0                                            | [7]                                |
| P17844                   | DDX5      | Probable ATP-dependent RNA helicase DDX5                                    | -                          | -                           | -                              | +                              | 0                                           | 0                                            | [7]                                |
| Q9BSY9                   | DES12     | Desumoylating isopeptidase 2                                                | +                          | -                           | -                              | -                              | 0                                           | 0                                            | -                                  |
| Q9P202                   | DFNB31    | Whirlin                                                                     | -                          | +                           | -                              | -                              | 0                                           | 0                                            | -                                  |
| P52429                   | DGKE      | Diacylglycerol kinase epsilon                                               | -                          | +                           | -                              | -                              | 2                                           | 1                                            | -                                  |
| Q43143                   | DHX15     | Putative pre-mRNA-splicing factor ATP-dependent RNA helicase DHX15          | -                          | -                           | -                              | +                              | 0                                           | 0                                            | [7]                                |
| Q08211                   | DHX9      | ATP-dependent RNA helicase A                                                | -                          | -                           | -                              | -                              | 1                                           | 0                                            | [4], [7]                           |
| Q9Y2H0                   | DLGAP4    | Disks large-associated protein 4                                            | +                          | -                           | -                              | -                              | 2                                           | 0                                            | [2]                                |
| P31689                   | DNAJA1    | DnaJ homolog subfamily A member 1                                           | -                          | -                           | +                              | -                              | 1                                           | 0                                            | [1]                                |
| Q75190-3                 | DNAJB6    | DnaJ homolog subfamily B member 6                                           | -                          | +                           | -                              | -                              | 0                                           | 0                                            | -                                  |
| Q9NVH1                   | DNAJC11   | DnaJ homolog subfamily C member 11                                          | -                          | -                           | +                              | -                              | 0                                           | 0                                            | -                                  |
| Q9H324                   | DNAJC5    | DnaJ homolog subfamily C member 5                                           | +                          | +                           | +                              | -                              | 13                                          | 1                                            | [1], [2], [3]                      |
| Q14126                   | DSG2      | Desmoglein-2                                                                | +                          | +                           | +                              | -                              | 1                                           | 2                                            | [1]                                |
| Q14204                   | DYNC1H1   | Cytoplasmic dynein 1 heavy chain 1                                          | -                          | -                           | -                              | -                              | 0                                           | 0                                            | [1]                                |
| O00559                   | EBAG9     | Receptor-binding cancer antigen expressed on SiSo cells                     | +                          | +                           | +                              | -                              | 1                                           | 0                                            | [1], [2], [8]                      |
| P42892-3                 | ECE1      | Endothelin-converting enzyme 1 (Isoform 3)                                  | +                          | +                           | -                              | -                              | 0                                           | 1                                            | -                                  |
| P42892                   | ECE1      | Endothelin-converting enzyme 1                                              | +                          | +                           | -                              | -                              | 0                                           | 1                                            | [2], [5]                           |
| Q13011                   | ECH1      | Delta(3,5)-Delta(2,4)-dienoyl-CoA isomerase, mitochondrial                  | -                          | -                           | -                              | +                              | 0                                           | 0                                            | [7]                                |
| Q6P2E9                   | EDC4      | Enhancer of mRNA-decapping protein 4                                        | -                          | -                           | -                              | -                              | 2                                           | 0                                            | [1]                                |
| P68104                   | EEF1A1    | Elongation factor 1-alpha 1                                                 | -                          | -                           | -                              | +                              | 0                                           | 0                                            | [7], [8]                           |
| P29692                   | EEF1D     | Elongation factor 1-delta                                                   | -                          | -                           | -                              | -                              | 0                                           | 0                                            | [1]                                |
| P26641                   | EEF1G     | Elongation factor 1-gamma                                                   | -                          | -                           | -                              | -                              | 0                                           | 0                                            | [1], [6], [8]                      |
| P13639                   | EEF2      | Elongation factor 2                                                         | -                          | -                           | +                              | +                              | 1                                           | 0                                            | [1], [5], [7]                      |
| O75071                   | EFCAB14   | EF-hand calcium-binding domain-containing protein 14                        | +                          | +                           | +                              | -                              | 2                                           | 1                                            | [1]                                |
| Q14156                   | EFR3A     | Protein EFR3 homolog A                                                      | -                          | +                           | -                              | -                              | 4                                           | 0                                            | [2], [3]                           |
| Q15029                   | EFTUD2    | 116 kDa US small nuclear ribonucleoprotein component                        | -                          | -                           | -                              | +                              | 0                                           | 0                                            | [7]                                |
| Q14152                   | EIF3A     | Eukaryotic translation initiation factor 3 subunit A                        | -                          | -                           | -                              | +                              | 0                                           | 0                                            | [1]                                |
| P55884                   | EIF3B     | Eukaryotic translation initiation factor 3 subunit B                        | -                          | -                           | -                              | -                              | 0                                           | 0                                            | [1]                                |
| Q99613                   | EIF3C     | Eukaryotic translation initiation factor 3 subunit C                        | -                          | -                           | -                              | -                              | 0                                           | 0                                            | [1]                                |
| B5ME19                   | EIF3CL    | Eukaryotic translation initiation factor 3 subunit C-like protein           | -                          | -                           | -                              | -                              | 0                                           | 0                                            | [5]                                |
| P60228                   | EIF3E     | Eukaryotic translation initiation factor 3 subunit E                        | -                          | -                           | -                              | -                              | 0                                           | 0                                            | [1]                                |
| Q9Y262                   | EIF3L     | Eukaryotic translation initiation factor 3 subunit L                        | -                          | -                           | -                              | -                              | 0                                           | 0                                            | [1]                                |
| Q7L2H7                   | EIF3M     | Eukaryotic translation initiation factor 3 subunit M                        | -                          | +                           | -                              | -                              | 2                                           | 0                                            | -                                  |
| P38919                   | EIF4A3    | Eukaryotic translation initiation factor 4A-III                             | -                          | -                           | +                              | -                              | 0                                           | 0                                            | [1]                                |
| P63241                   | EIF5A     | Eukaryotic translation initiation factor 5A-1                               | -                          | -                           | -                              | -                              | 0                                           | 0                                            | [1], [2], [6]                      |
| Q9NYP7                   | ELOVL5    | Elongation of very long chain fatty acids protein 5                         | -                          | +                           | -                              | -                              | 1                                           | 7                                            | -                                  |
| Q6PCB8                   | EMB       | Embiggin                                                                    | +                          | +                           | -                              | -                              | 0                                           | 1                                            | -                                  |
| P54852                   | EMP3      | Epithelial membrane protein 3 (Fragment)                                    | -                          | +                           | -                              | -                              | 1                                           | 4                                            | -                                  |
| P06733                   | ENO1      | Alpha-enolase                                                               | -                          | -                           | -                              | +                              | 0                                           | 0                                            | [5], [7]                           |
| Q9Y227                   | ENTPD4    | Ectonucleoside triphosphate diphosphohydrolase 4                            | -                          | +                           | -                              | -                              | 0                                           | 2                                            | -                                  |
| P07814                   | EPRS      | Bifunctional glutamate/proline-tRNA ligase                                  | -                          | -                           | +                              | -                              | 1                                           | 0                                            | [1], [8]                           |
| Q96RT1                   | ERBB2IP   | Protein LAP2                                                                | -                          | +                           | +                              | -                              | 3                                           | 0                                            | [1], [2]                           |
| Q96RT1-7                 | ERBB2IP   | Protein LAP2 (Isoform 7)                                                    | +                          | +                           | -                              | -                              | 3                                           | 0                                            | -                                  |
| Q969X5                   | ERGIC1    | Endoplasmic reticulum-Golgi intermediate compartment protein 1              | +                          | +                           | -                              | -                              | 1                                           | 2                                            | [3]                                |
| Q96RQ1                   | ERGIC2    | Endoplasmic reticulum-Golgi intermediate compartment protein 2              | -                          | +                           | -                              | -                              | 0                                           | 0                                            | [1]                                |
| Q9Y282                   | ERGIC3    | Endoplasmic reticulum-Golgi intermediate compartment protein 3              | +                          | +                           | -                              | -                              | 0                                           | 2                                            | [1], [2], [3], [5], [8]            |
| Q9BSJ8                   | ESYT1     | Extended synaptotagmin-1                                                    | -                          | -                           | -                              | -                              | 0                                           | 2                                            | [1], [6]                           |
| A0FGR8                   | ESYT2     | Extended synaptotagmin-2                                                    | -                          | -                           | -                              | -                              | 0                                           | 1                                            | [1]                                |
| P34910                   | EVI2B     | Protein EVI2B                                                               | -                          | +                           | -                              | -                              | 1                                           | 1                                            | -                                  |
| Q92817                   | EVPL      | Envoplakin                                                                  | -                          | +                           | -                              | -                              | 2                                           | 0                                            | -                                  |
| P05413                   | FABP3     | Fatty acid-binding protein, heart                                           | +                          | -                           | -                              | -                              | 1                                           | 0                                            | -                                  |
| A8MVVW0                  | FAM171A2  | Protein FAM171A2                                                            | +                          | +                           | -                              | -                              | 2                                           | 2                                            | -                                  |
| Q8N128                   | FAM177A1  | Protein FAM177A1                                                            | +                          | +                           | -                              | -                              | 0                                           | 0                                            | -                                  |
| Q8IW50                   | FAM219A   | Protein FAM219A                                                             | +                          | +                           | +                              | -                              | 2                                           | 0                                            | [5]                                |
| Q9NUQ9                   | FAM49B    | Protein FAM49B                                                              | +                          | +                           | +                              | -                              | 0                                           | 0                                            | [1], [2]                           |
| P25445                   | FAS       | Tumor necrosis factor receptor superfamily member 6                         | -                          | +                           | +                              | -                              | 2                                           | 0                                            | -                                  |
| Q9Y311                   | FBXO7     | F-box only protein 7                                                        | -                          | +                           | +                              | -                              | 0                                           | 0                                            | -                                  |
| P02671                   | FGA       | Fibrinogen alpha chain                                                      | +                          | +                           | -                              | -                              | 1                                           | 0                                            | -                                  |
| P02675                   | FGB       | Fibrinogen beta chain                                                       | -                          | +                           | -                              | -                              | 0                                           | 0                                            | -                                  |
| P09769                   | FGR       | Tyrosine-protein kinase Fgr                                                 | -                          | +                           | -                              | -                              | 2                                           | 0                                            | -                                  |
| Q14318                   | FKBP8     | Peptidyl-prolyl cis-trans isomerase FKBP8                                   | -                          | -                           | -                              | +                              | 1                                           | 1                                            | [1]                                |
| P21333                   | FLNA      | Filamin-A                                                                   | -                          | -                           | -                              | -                              | 0                                           | 0                                            | [1], [4]                           |
| O75369                   | FLNB      | Filamin-B                                                                   | -                          | -                           | -                              | -                              | 0                                           | 0                                            | [1], [4], [5]                      |
| O75955                   | FLOT1     | Flotillin-1                                                                 | +                          | +                           | +                              | -                              | 1                                           | 0                                            | [1], [2], [3], [4], [5]            |
| Q14254                   | FLOT2     | Flotillin-2                                                                 | +                          | +                           | +                              | -                              | 3                                           | 0                                            | [1], [2], [3], [5]                 |
| Q9Y2H6                   | FNDC3A    | Fibronectin type-III domain-containing protein 3A                           | -                          | +                           | -                              | -                              | 1                                           | 1                                            | [8]                                |
| P06241                   | FYN       | Tyrosine-protein kinase Fyn                                                 | -                          | +                           | +                              | +                              | 4                                           | 0                                            | [1], [2], [3], [5]                 |
| P06241-3                 | FYN       | Tyrosine-protein kinase Fyn (Isoform 3)                                     | +                          | +                           | -                              | -                              | 2                                           | 0                                            | -                                  |
| Q10472                   | GALNT1    | Polypeptide N-acetylgalactosaminyltransferase 1                             | +                          | +                           | -                              | -                              | 1                                           | 1                                            | -                                  |
| Q81XK2                   | GALNT12   | Polypeptide N-acetylgalactosaminyltransferase 12                            | +                          | +                           | +                              | -                              | 1                                           | 1                                            | [1]                                |
| Q14697                   | GANAB     | Neutral alpha-glucosidase AB                                                | -                          | -                           | -                              | +                              | 0                                           | 1                                            | [7]                                |
| P04406                   | GAPDH     | Glyceraldehyde-3-phosphate dehydrogenase                                    | -                          | -                           | -                              | -                              | 1                                           | 0                                            | [4], [6], [7]                      |
| Q9NY12                   | GAR1      | H/ACA ribonucleoprotein complex subunit 1                                   | +                          | +                           | -                              | -                              | 0                                           | 0                                            | -                                  |
| P50395                   | GD12      | Rab GDP dissociation inhibitor beta                                         | -                          | -                           | -                              | +                              | 0                                           | 0                                            | [7]                                |
| Q9UG22                   | GIMAP2    | GTPase IMAP family member 2                                                 | -                          | +                           | -                              | -                              | 3                                           | 2                                            | -                                  |
| Q92896                   | GLG1      | Golgi apparatus protein 1                                                   | -                          | +                           | +                              | -                              | 2                                           | 1                                            | [1], [3], [8]                      |
| P29992                   | GNA11     | Guanine nucleotide-binding protein subunit alpha-11                         | -                          | +                           | +                              | -                              | 2                                           | 0                                            | [1], [2], [4], [5], [6]            |
| Q03113                   | GNA12     | Guanine nucleotide-binding protein subunit alpha-12                         | -                          | +                           | +                              | -                              | 0                                           | 0                                            | [4]                                |
| Q14344                   | GNA13     | Guanine nucleotide-binding protein subunit alpha-13                         | +                          | +                           | +                              | -                              | 2                                           | 0                                            | [1], [2], [4], [5]                 |
| P30679                   | GNA15     | Guanine nucleotide-binding protein subunit alpha-15                         | +                          | +                           | +                              | -                              | 3                                           | 0                                            | [1], [2]                           |
| P04899                   | GNAI2     | Guanine nucleotide-binding protein G(i) subunit alpha-2                     | -                          | +                           | +                              | -                              | 1                                           | 0                                            | [1], [4], [5]                      |
| P08754                   | GNAI3     | Guanine nucleotide-binding protein G(k) subunit alpha                       | -                          | +                           | +                              | -                              | 2                                           | 0                                            | [1], [2], [4], [5]                 |
| P09471                   | GNAO1     | Guanine nucleotide-binding protein G(o) subunit alpha                       | -                          | +                           | +                              | -                              | 1                                           | 0                                            | [5]                                |
| P09471-2                 | GNAO1     | Isoform Alpha-2 of Guanine nucleotide-binding protein G(o) subunit alpha    | -                          | +                           | -                              | -                              | 1                                           | 0                                            | -                                  |

| UniProt Accession Number | Gene Name | Protein                                                              | Enriched in Jurkat T cells | Enriched in Primary T cells | Enriched in Martin et al. 2009 | Enriched in Wilson et al. 2011 | Predicted Palmitoylation Sites <sup>a</sup> | Predicted Transmembrane Helices <sup>b</sup> | Literature References <sup>c</sup> |
|--------------------------|-----------|----------------------------------------------------------------------|----------------------------|-----------------------------|--------------------------------|--------------------------------|---------------------------------------------|----------------------------------------------|------------------------------------|
| P50148                   | GNAQ      | Guanine nucleotide-binding protein G(q) subunit alpha                | +                          | +                           | +                              | -                              | 2                                           | 0                                            | [1], [2], [3], [4], [5]            |
| P84996                   | GNAS      | Protein ALEX                                                         | -                          | -                           | +                              | -                              | 4                                           | 0                                            | [4], [5]                           |
| P63092                   | GNAS      | Guanine nucleotide-binding protein G(s) subunit alpha isoforms short | -                          | +                           | -                              | -                              | 1                                           | 0                                            | [6]                                |
| P19086                   | GNAZ      | Guanine nucleotide-binding protein G(z) subunit alpha                | -                          | +                           | -                              | -                              | 2                                           | 0                                            | -                                  |
| P63244                   | GNB2L1    | Guanine nucleotide-binding protein subunit beta-2-like 1             | -                          | -                           | -                              | +                              | 0                                           | 0                                            | [5], [7]                           |
| O15228                   | GNPAT     | Dihydroxyacetone phosphate acyltransferase                           | -                          | -                           | +                              | -                              | 1                                           | 0                                            | [1]                                |
| Q72544                   | GOLGA7    | Golgin subfamily A member 7                                          | +                          | +                           | +                              | -                              | 0                                           | 0                                            | [1], [2], [3]                      |
| Q2TAP0                   | GOLGA7B   | Golgin subfamily A member 7B                                         | -                          | +                           | -                              | -                              | 0                                           | 0                                            | -                                  |
| Q14789                   | GOLGB1    | Golgin subfamily B member 1                                          | +                          | +                           | +                              | -                              | 2                                           | 1                                            | [1]                                |
| Q99795                   | GPA33     | Cell surface A33 antigen                                             | -                          | +                           | -                              | -                              | 6                                           | 1                                            | -                                  |
| Q9NPR9                   | GPR108    | Protein GPR108                                                       | -                          | +                           | -                              | -                              | 0                                           | 7                                            | -                                  |
| P32249                   | GPR183    | G-protein coupled receptor 183                                       | -                          | +                           | -                              | -                              | 0                                           | 7                                            | -                                  |
| Q15743                   | GPR68     | Ovarian cancer G-protein coupled receptor 1                          | -                          | +                           | -                              | -                              | 1                                           | 7                                            | -                                  |
| Q62VF9                   | GPRIN3    | G protein-regulated inducer of neurite outgrowth 3                   | -                          | +                           | -                              | -                              | 1                                           | 0                                            | [8]                                |
| P07203                   | GPX1      | Glutathione peroxidase 1                                             | +                          | -                           | -                              | -                              | 2                                           | 0                                            | [8]                                |
| P09211                   | GSTP1     | Glutathione S-transferase P                                          | -                          | -                           | +                              | +                              | 0                                           | 0                                            | [1], [7]                           |
| Q8WW33                   | GTSF1     | Gametocyte-specific factor 1                                         | +                          | -                           | -                              | -                              | 0                                           | 0                                            | -                                  |
| O75367                   | H2AFY     | Core histone macro-H2A.1                                             | -                          | -                           | +                              | -                              | 0                                           | 0                                            | [5]                                |
| P84243                   | H3F3B     | Histone H3                                                           | -                          | -                           | -                              | +                              | 0                                           | 0                                            | [7]                                |
| P40939                   | HADHA     | Trifunctional enzyme subunit alpha, mitochondrial                    | -                          | -                           | +                              | -                              | 1                                           | 0                                            | [1], [8]                           |
| P55084                   | HADHB     | Trifunctional enzyme subunit beta, mitochondrial                     | -                          | -                           | +                              | -                              | 0                                           | 0                                            | [1]                                |
| Q98H54                   | HDHD3     | Haloacid dehalogenase-like hydrolase domain-containing protein 3     | -                          | +                           | -                              | -                              | 1                                           | 0                                            | -                                  |
| O75146                   | HIP1R     | Huntingtin-interacting protein 1-related protein                     | -                          | +                           | -                              | -                              | 1                                           | 0                                            | -                                  |
| P30443                   | HLA-A     | HLA class I histocompatibility antigen, A-1 alpha chain              | -                          | -                           | +                              | -                              | 1                                           | 1                                            | [5]                                |
| P01889                   | HLA-B     | HLA class I histocompatibility antigen, B-7 alpha chain              | +                          | -                           | +                              | -                              | 2                                           | 1                                            | [1], [4]                           |
| P30499                   | HLA-C     | HLA class I histocompatibility antigen, Cw-1 alpha chain             | -                          | -                           | +                              | -                              | 2                                           | 1                                            | [3], [4], [5]                      |
| P30504                   | HLA-C     | HLA class I histocompatibility antigen, Cw-4 alpha chain             | +                          | +                           | -                              | -                              | 2                                           | 1                                            | -                                  |
| P30501                   | HLA-C     | HLA class I histocompatibility antigen, Cw-2 alpha chain             | -                          | +                           | -                              | -                              | 1                                           | 1                                            | -                                  |
| P13747                   | HLA-E     | HLA class I histocompatibility antigen, alpha chain E                | -                          | -                           | +                              | -                              | 0                                           | 1                                            | [1]                                |
| P09429                   | HMOX1     | High mobility group protein B1                                       | -                          | -                           | -                              | +                              | 0                                           | 0                                            | [7]                                |
| P30519                   | HMOX2     | Heme oxygenase 2                                                     | -                          | -                           | +                              | -                              | 0                                           | 1                                            | [1]                                |
| P09651                   | HNRNPA1   | Heterogeneous nuclear ribonucleoprotein A1                           | -                          | -                           | -                              | +                              | 0                                           | 0                                            | [5], [7], [8]                      |
| P22626                   | HNRNPA2B1 | Heterogeneous nuclear ribonucleoproteins A2/B1                       | -                          | -                           | -                              | +                              | 0                                           | 0                                            | [5], [7], [8]                      |
| Q14103                   | HNRNPD    | Heterogeneous nuclear ribonucleoprotein D0                           | -                          | -                           | -                              | +                              | 0                                           | 0                                            | [7]                                |
| P31942                   | HNRNPH3   | Heterogeneous nuclear ribonucleoprotein H3                           | -                          | -                           | +                              | -                              | 0                                           | 0                                            | [1]                                |
| P61978                   | HNRNPK    | Heterogeneous nuclear ribonucleoprotein K                            | -                          | -                           | -                              | +                              | 0                                           | 0                                            | [5], [7]                           |
| P14866                   | HNRNPL    | Heterogeneous nuclear ribonucleoprotein L                            | -                          | -                           | +                              | -                              | 3                                           | 0                                            | [1]                                |
| Q00839                   | HNRNPU    | Heterogeneous nuclear ribonucleoprotein U                            | -                          | -                           | -                              | +                              | 0                                           | 0                                            | [7], [8]                           |
| P00738                   | HP        | Haptoglobin                                                          | +                          | -                           | -                              | -                              | 0                                           | 0                                            | -                                  |
| Q5SS15                   | HP1BP3    | Heterochromatin protein 1-binding protein 3                          | -                          | -                           | +                              | -                              | 0                                           | 0                                            | [1]                                |
| P01112                   | HRAS      | GTPase HRas                                                          | +                          | -                           | +                              | -                              | 3                                           | 0                                            | [1], [2], [5], [6]                 |
| Q99714                   | HSD17B10  | 3-hydroxyacyl-CoA dehydrogenase type-2                               | -                          | -                           | +                              | +                              | 1                                           | 0                                            | [1], [7]                           |
| P07900                   | HSP90AA1  | Heat shock protein HSP 90-alpha                                      | -                          | -                           | -                              | +                              | 2                                           | 0                                            | [7]                                |
| P08238                   | HSP90AB1  | Heat shock protein HSP 90-beta                                       | -                          | -                           | -                              | +                              | 1                                           | 0                                            | [7]                                |
| P14625                   | HSP90B1   | Endoplasmic reticulum chaperone protein 90B                          | -                          | -                           | -                              | +                              | 3                                           | 0                                            | [7]                                |
| P08107                   | HSPA1A    | Heat shock 70 kDa protein 1A/1B                                      | -                          | -                           | +                              | +                              | 0                                           | 0                                            | [1], [7]                           |
| P34932                   | HSPA4     | Heat shock 70 kDa protein 4                                          | -                          | -                           | -                              | +                              | 2                                           | 0                                            | [7]                                |
| P11021                   | HSPA5     | 78 kDa glucose-regulated protein                                     | -                          | -                           | -                              | +                              | 0                                           | 0                                            | [7]                                |
| P11142                   | HSPA8     | Heat shock cognate 71 kDa protein                                    | -                          | -                           | -                              | +                              | 1                                           | 0                                            | [7]                                |
| P38646                   | HSPA9     | Stress-70 protein, mitochondrial                                     | -                          | -                           | -                              | +                              | 0                                           | 0                                            | [6], [7]                           |
| P10809                   | HSPD1     | 60 kDa heat shock protein, mitochondrial                             | -                          | -                           | -                              | +                              | 0                                           | 0                                            | [5], [7]                           |
| P41252                   | IARS      | Isoleucine-tRNA ligase, cytoplasmic                                  | -                          | -                           | +                              | -                              | 0                                           | 0                                            | [1]                                |
| P13598                   | ICAM2     | Intercellular adhesion molecule 2                                    | +                          | +                           | -                              | -                              | 2                                           | 1                                            | [5]                                |
| Q01629                   | IFITM2    | Interferon-induced transmembrane protein 1                           | +                          | -                           | -                              | -                              | 3                                           | 2                                            | [3], [5]                           |
| Q01628                   | IFITM3    | Interferon-induced transmembrane protein 3                           | +                          | -                           | -                              | -                              | 3                                           | 2                                            | [2], [3], [5]                      |
| P17181                   | IFNAR1    | Interferon alpha/beta receptor 1                                     | -                          | +                           | -                              | -                              | 1                                           | 2                                            | -                                  |
| P11717                   | IGF2R     | Cation-independent mannose-6-phosphate receptor                      | +                          | +                           | +                              | +                              | 3                                           | 1                                            | [1], [3], [7], [8]                 |
| Q969P0                   | IGSF8     | Immunoglobulin superfamily member 8                                  | +                          | +                           | +                              | -                              | 2                                           | 1                                            | [1], [8]                           |
| P24001                   | IL32      | Interleukin-32                                                       | -                          | -                           | +                              | -                              | 5                                           | 0                                            | [5]                                |
| P24001-4                 | IL32      | Interleukin-32 (isoform 4)                                           | +                          | -                           | -                              | -                              | 1                                           | 0                                            | -                                  |
| Q71H61                   | ILDR2     | Immunoglobulin-like domain-containing receptor 2                     | +                          | -                           | -                              | -                              | 12                                          | 1                                            | -                                  |
| Q12905                   | ILF2      | Interleukin enhancer-binding factor 2                                | -                          | -                           | +                              | -                              | 0                                           | 0                                            | [1]                                |
| Q16891                   | IMMT      | Mitochondrial inner membrane protein                                 | -                          | -                           | -                              | +                              | 2                                           | 0                                            | [1]                                |
| P12268                   | IMPDH2    | Inosine-5'-monophosphate dehydrogenase 2                             | -                          | -                           | -                              | +                              | 0                                           | 0                                            | [1]                                |
| O00410                   | IP05      | Importin-5                                                           | -                          | -                           | +                              | +                              | 2                                           | 0                                            | [1], [7], [8]                      |
| P46940                   | IQGAP1    | Ras GTPase-activating-like protein IQGAP1                            | -                          | -                           | +                              | -                              | 0                                           | 0                                            | [1]                                |
| Q9H0X4                   | ITFG3     | Protein ITFG3                                                        | +                          | +                           | -                              | -                              | 2                                           | 1                                            | -                                  |
| P23229-4                 | ITGA6     | Integrin alpha-6 (isoform 4)                                         | +                          | -                           | -                              | -                              | 2                                           | 1                                            | -                                  |
| P23229                   | ITGA6     | Integrin alpha-6                                                     | -                          | +                           | -                              | -                              | 1                                           | 1                                            | [5]                                |
| O43736                   | ITM2A     | Integral membrane protein 2A                                         | +                          | -                           | +                              | -                              | 1                                           | 1                                            | [1]                                |
| Q9Y287                   | ITM2B     | Integral membrane protein 2B                                         | +                          | -                           | -                              | -                              | 1                                           | 1                                            | -                                  |
| Q9NQX7                   | ITM2C     | Integral membrane protein 2C                                         | +                          | -                           | -                              | -                              | 2                                           | 1                                            | [8]                                |
| P23458                   | JAK1      | Tyrosine-protein kinase JAK1                                         | -                          | +                           | +                              | -                              | 3                                           | 0                                            | -                                  |
| Q9BX67                   | JAM3      | Junctional adhesion molecule C                                       | +                          | +                           | -                              | -                              | 3                                           | 1                                            | [2], [8]                           |
| Q15046                   | KARS      | Lysine-tRNA ligase                                                   | -                          | -                           | +                              | -                              | 0                                           | 0                                            | [1]                                |
| Q9Y4C1                   | KDM3A     | Lysine-specific demethylase 3A                                       | -                          | +                           | -                              | -                              | 0                                           | 0                                            | -                                  |
| Q8I2A0                   | KIAA0319L | Dyslexia-associated protein KIAA0319-like protein                    | +                          | +                           | -                              | -                              | 4                                           | 1                                            | -                                  |
| A2VDJ0                   | KIAA0922  | Transmembrane protein 131-like                                       | -                          | -                           | -                              | -                              | 3                                           | 0                                            | -                                  |
| Q9BY89                   | KIAA1671  | Uncharacterized protein KIAA1671                                     | -                          | +                           | +                              | -                              | 0                                           | 0                                            | -                                  |
| Q8IY52                   | KIAA2013  | Uncharacterized protein KIAA2013                                     | -                          | +                           | +                              | -                              | 0                                           | 2                                            | [1], [2], [3]                      |
| P52732                   | KIF11     | Kinesin-like protein KIF11                                           | -                          | -                           | +                              | -                              | 2                                           | 0                                            | [1]                                |
| P43630                   | KIR3DL2   | Killer cell immunoglobulin-like receptor 3DL2                        | +                          | -                           | -                              | -                              | 1                                           | 1                                            | -                                  |
| Q6UWL6-3                 | KIRREL2   | Kin of IRRE-like protein 2                                           | +                          | -                           | -                              | -                              | 2                                           | 1                                            | -                                  |
| Q8NBE8                   | KLHL23    | Kelch-like protein 23                                                | -                          | +                           | -                              | -                              | 0                                           | 0                                            | -                                  |
| P52292                   | KPNA2     | Importin subunit alpha-2                                             | -                          | -                           | +                              | -                              | 0                                           | 0                                            | [1]                                |
| Q14974                   | KPNB1     | Importin subunit beta-1                                              | -                          | -                           | +                              | +                              | 2                                           | 0                                            | [1], [7]                           |
| P01116                   | KRAS      | GTPase KRas                                                          | -                          | -                           | +                              | -                              | 2                                           | 0                                            | [1]                                |
| Q6GT88                   | LAIR1     | Leukocyte-associated immunoglobulin-like receptor 1                  | +                          | -                           | -                              | -                              | 1                                           | 1                                            | -                                  |
| Q6IAA8                   | LAMTOR1   | Regulator complex protein LAMTOR1                                    | +                          | -                           | +                              | +                              | 2                                           | 0                                            | [1], [5], [7]                      |
| Q9P2J5                   | LARS      | Leucine-tRNA ligase, cytoplasmic                                     | -                          | -                           | -                              | -                              | 0                                           | 0                                            | [1]                                |
| O43561                   | LAT       | Linker for activation of T-cells family member 1                     | +                          | +                           | +                              | -                              | 3                                           | 1                                            | [1], [2], [3]                      |
| P06239                   | LCK       | Tyrosine-protein kinase Lck                                          | +                          | +                           | -                              | -                              | 2                                           | 0                                            | [1], [5]                           |
| P13796                   | LCP1      | Plastin-2                                                            | -                          | -                           | -                              | +                              | 1                                           | 0                                            | [7]                                |
| P00338                   | LDHA      | L-lactate dehydrogenase A chain                                      | -                          | -                           | -                              | +                              | 1                                           | 0                                            | [7]                                |
| P07195                   | LDHB      | L-lactate dehydrogenase B chain                                      | -                          | -                           | -                              | +                              | 0                                           | 0                                            | [5], [7], [8]                      |
| O15165                   | LDLRAD4   | Low-density lipoprotein receptor class A domain-containing protein 4 | -                          | -                           | +                              | -                              | 0                                           | 1                                            | [5]                                |
| O95202                   | LETM1     | LETM1 and EF-hand domain-containing protein 1, mitochondrial         | -                          | -                           | +                              | -                              | 1                                           | 1                                            | [1]                                |
| Q9H400                   | LIME1     | Lck-interacting transmembrane adapter 1                              | +                          | +                           | -                              | -                              | 3                                           | 1                                            | -                                  |
| Q9BU23                   | LMF2      | Lipase maturation factor 2                                           | -                          | +                           | -                              | -                              | 0                                           | 7                                            | -                                  |
| P20700                   | LMNB1     | Lamin-B1                                                             | -                          | -                           | -                              | +                              | 2                                           | 0                                            | [7]                                |
| Q8IWU2                   | LMTK2     | Serine/threonine-protein kinase LMTK2                                | +                          | +                           | -                              | -                              | 2                                           | 3                                            | -                                  |
| Q9UIQ6                   | LNPEP     | Leucyl-cystinyl aminopeptidase                                       | -                          | +                           | +                              | -                              | 0                                           | 1                                            | [1], [2], [3]                      |
| Q9UIQ6-3                 | LNPEP     | Leucyl-cystinyl aminopeptidase (isoform 3)                           | +                          | +                           | -                              | -                              | 0                                           | 1                                            | -                                  |
| Q9Y561                   | LRP12     | Low-density lipoprotein receptor-related protein 12                  | +                          | +                           | +                              | -                              | 3                                           | 1                                            | -                                  |
| Q9BT76                   | LRRC1     | Leucine-rich repeat-containing protein 1                             | -                          | -                           | +                              | -                              | 2                                           | 0                                            | [1]                                |
| A6NH25                   | LRRC14B   | Leucine-rich repeat-containing protein 14B                           | -                          | +                           | -                              | -                              | 0                                           | 0                                            | -                                  |
| Q8N386                   | LRRC25    | Leucine-rich repeat-containing protein 25                            | -                          | +                           | -                              | -                              | 0                                           | 1                                            | -                                  |
| Q86X29                   | LSR       | Lipolysis-stimulated lipoprotein receptor                            | -                          | -                           | -                              | -                              | 12                                          | 1                                            | -                                  |
| P48449                   | LSS       | Lanosterol synthase                                                  | -                          | -                           | +                              | -                              | 0                                           | 0                                            | [1]                                |
| Q9HBG7                   | LY9       | T-lymphocyte surface antigen Ly-9 (Fragment)                         | -                          | +                           | -                              | -                              | 3                                           | 1                                            | [3]                                |
| P20645                   | M6PR      | Cation-dependent mannose-6-phosphate receptor                        | +                          | +                           | -                              | -                              | 2                                           | 1                                            | [2], [4]                           |
| Q9UKM7                   | MAN1B1    | Endoplasmic reticulum mannosyl-oligosaccharide 1,2-alpha-mannosidase | +                          | +                           | -                              | -                              | 1                                           | 1                                            | -                                  |
| P56192                   | MARS      | Methionine-tRNA ligase, cytoplasmic                                  | -                          | -                           | +                              | -                              | 1                                           | 0                                            | [1]                                |
| Q68D91                   | MBLAC2    | Metallo-beta-lactamase domain-containing protein 2                   | +                          | +                           | -                              | -                              | 0                                           | 0                                            | [2], [6]                           |
| P49736                   | MCM2      | DNA replication licensing factor MCM2                                | -                          | -                           | +                              | -                              | 1                                           | 0                                            | [1]                                |
| P33991                   | MCM4      | DNA replication licensing factor MCM4                                | -                          | -                           | +                              | -                              | 1                                           | 0                                            | [1]                                |
| Q14566                   | MCM6      | DNA replication licensing factor MCM6                                | -                          | -                           | +                              | -                              | 2                                           | 0                                            | [1]                                |
| P33993                   | MCM7      | DNA replication licensing factor MCM7                                | -                          | -                           | +                              | -                              | 1                                           | 0                                            | [1]                                |
| Q9GZU1                   | MCOLN1    | Mucopolip-1                                                          | +                          | -                           | -                              | -                              | 7                                           | 5                                            | -                                  |
| Q9P177                   | MDFC      | MyoD family inhibitor domain-containing protein                      | -                          | +                           | -                              | -                              | 11                                          | 0                                            | -                                  |

| UniProt Accession Number | Gene Name | Protein                                                                  | Enriched in Jurkat T cells | Enriched in Primary T cells | Enriched in Martin et al. 2009 | Enriched in Wilson et al. 2011 | Predicted Palmitoylation Sites <sup>a</sup> | Predicted Transmembrane Helices <sup>b</sup> | Literature References <sup>c</sup> |
|--------------------------|-----------|--------------------------------------------------------------------------|----------------------------|-----------------------------|--------------------------------|--------------------------------|---------------------------------------------|----------------------------------------------|------------------------------------|
| P40926                   | MDH2      | Malate dehydrogenase, mitochondrial                                      | -                          | -                           | -                              | -                              | 2                                           | 0                                            | [5], [7]                           |
| O9NU22                   | MDN1      | Midasin                                                                  | -                          | +                           | +                              | -                              | 4                                           | 0                                            | [1]                                |
| Q6Z557                   | MFSD6     | Major facilitator superfamily domain-containing protein 6                | -                          | -                           | -                              | -                              | 0                                           | 11                                           | [2]                                |
| O14880                   | MGST3     | Microsomal glutathione S-transferase 3                                   | -                          | -                           | +                              | -                              | 2                                           | 4                                            | [1], [6]                           |
| Q29980                   | MICB      | MHC class I polypeptide-related sequence B                               | +                          | -                           | -                              | -                              | 0                                           | 0                                            | -                                  |
| Q14165                   | MLEC      | Malectin                                                                 | -                          | +                           | +                              | -                              | 2                                           | 1                                            | [1], [2], [3]                      |
| Q8IVH4                   | MMAA      | Methylmalonic aciduria type A protein, mitochondrial                     | +                          | -                           | -                              | -                              | 0                                           | 0                                            | -                                  |
| Q9BRT2                   | MNF1      | Mitochondrial nucleoid factor 1                                          | +                          | +                           | -                              | -                              | 0                                           | 0                                            | [4], [5]                           |
| P05164                   | MPO       | Myeloperoxidase                                                          | +                          | -                           | -                              | -                              | 0                                           | 0                                            | -                                  |
| Q9NZW5                   | MPP6      | MAGUK p55 subfamily member 6                                             | -                          | +                           | +                              | -                              | 0                                           | 0                                            | [1], [4], [6]                      |
| Q8N565                   | MREG      | Melanoregulin                                                            | +                          | +                           | +                              | -                              | 6                                           | 0                                            | [1]                                |
| P11836                   | MS4A1     | B-lymphocyte antigen CD20                                                | -                          | +                           | -                              | -                              | 1                                           | 4                                            | -                                  |
| P26038                   | MSN       | Moesin                                                                   | -                          | -                           | -                              | +                              | 0                                           | 0                                            | [7]                                |
| Q9Y3D2                   | MSRB2     | Methionine-R-sulfoxide reductase B2, mitochondrial                       | +                          | -                           | -                              | -                              | 0                                           | 0                                            | -                                  |
| P03915                   | MT-ND5    | NADH-ubiquinone oxidoreductase chain 5                                   | -                          | +                           | -                              | -                              | 0                                           | 15                                           | -                                  |
| Q86UE4                   | MTDH      | Protein LYRIC                                                            | +                          | +                           | +                              | -                              | 1                                           | 1                                            | [1], [2], [3], [5], [8]            |
| Q13614                   | MTMR2     | Myotubularin-related protein 2                                           | -                          | +                           | -                              | -                              | 1                                           | 0                                            | -                                  |
| O75570                   | MTRF1     | Peptide chain release factor 1, mitochondrial                            | +                          | -                           | -                              | -                              | 1                                           | 0                                            | -                                  |
| Q8WXI7                   | MUC16     | Mucin-16                                                                 | -                          | -                           | +                              | -                              | 0                                           | 1                                            | [5]                                |
| Q96597                   | MYADM     | Myeloid-associated differentiation marker                                | +                          | +                           | +                              | -                              | 0                                           | 8                                            | [1]                                |
| P35579                   | MYH9      | Myosin-9                                                                 | -                          | -                           | -                              | +                              | 0                                           | 0                                            | [7], [8]                           |
| P60660                   | MYL6      | Myosin light polypeptide 6                                               | -                          | -                           | -                              | +                              | 2                                           | 0                                            | [7]                                |
| B01172                   | MYO1G     | Unconventional myosin-Ig                                                 | -                          | -                           | +                              | +                              | 0                                           | 0                                            | [1], [7]                           |
| Q9NZM1                   | MYOF      | Myoferlin                                                                | -                          | +                           | -                              | -                              | 0                                           | 1                                            | [3], [4], [5]                      |
| P54920                   | NAPA      | Alpha-soluble NSF attachment protein                                     | -                          | -                           | +                              | -                              | 0                                           | 0                                            | [1]                                |
| P18440                   | NAT1      | Arylamine N-acetyltransferase 1                                          | -                          | +                           | -                              | -                              | 0                                           | 0                                            | -                                  |
| Q9H0A0                   | NAT10     | N-acetyltransferase 10                                                   | -                          | +                           | +                              | -                              | 0                                           | 0                                            | [1]                                |
| Q6PIU2                   | NCEH1     | Neutral cholesterol ester hydrolase 1                                    | -                          | +                           | +                              | -                              | 1                                           | 1                                            | [1]                                |
| Q92542                   | NCTN      | Nicestrin                                                                | +                          | +                           | -                              | -                              | 1                                           | 1                                            | -                                  |
| Q9B767                   | NDFIP1    | NEDD4 family-interacting protein 1                                       | +                          | +                           | +                              | -                              | 1                                           | 3                                            | [1], [4]                           |
| O14561                   | NDUFAB1   | Acyl carrier protein                                                     | +                          | -                           | -                              | -                              | 0                                           | 0                                            | -                                  |
| Q00653                   | NFKB2     | Nuclear factor NF-kappa-B p100 subunit                                   | -                          | +                           | -                              | -                              | 1                                           | 0                                            | -                                  |
| Q13423                   | NNT       | NAD(P) transhydrogenase, mitochondrial                                   | -                          | -                           | +                              | -                              | 1                                           | 12                                           | [1], [2], [8]                      |
| Q15233                   | NONO      | Non-POU domain-containing octamer-binding protein                        | -                          | -                           | +                              | -                              | 0                                           | 0                                            | [1], [4]                           |
| O15118                   | NPC1      | Niemann-Pick C1 protein                                                  | +                          | +                           | -                              | -                              | 1                                           | 12                                           | [3]                                |
| P06748                   | NPM1      | Nucleophosmin                                                            | -                          | -                           | -                              | +                              | 0                                           | 0                                            | [7], [8]                           |
| P01111                   | NRAS      | GTPase NRas                                                              | +                          | +                           | -                              | -                              | 2                                           | 0                                            | [2], [3], [5]                      |
| Q96D31                   | ORAI1     | Calcium release-activated calcium channel protein 1                      | -                          | -                           | -                              | -                              | 0                                           | 3                                            | [2]                                |
| Q9NWU1                   | OXSMT     | 3-oxoacyl-[acyl-carrier-protein] synthase, mitochondrial                 | +                          | +                           | +                              | -                              | 2                                           | 0                                            | [2], [4], [5]                      |
| Q99572                   | P2RX7     | P2X purinoceptor 7                                                       | -                          | +                           | -                              | -                              | 5                                           | 1                                            | [8]                                |
| P07237                   | P4HB      | Protein disulfide-isomerase                                              | -                          | -                           | -                              | +                              | 1                                           | 0                                            | [6], [7]                           |
| Q9UQ00                   | PA2G4     | Proliferation-associated protein 2G4                                     | -                          | -                           | +                              | -                              | 0                                           | 0                                            | [1]                                |
| Q9LUK56                  | PACSN3    | Protein kinase C and casein kinase substrate in neurons protein 3        | +                          | -                           | -                              | -                              | 2                                           | 0                                            | -                                  |
| Q99487                   | PAFAH2    | Platelet-activating factor acetylhydrolase 2, cytoplasmic                | -                          | -                           | +                              | -                              | 1                                           | 0                                            | [1]                                |
| Q9NWQ8                   | PAG1      | Phosphoprotein associated with glycosphingolipid-enriched microdomains 1 | +                          | +                           | -                              | -                              | 2                                           | 1                                            | -                                  |
| Q9H649                   | PCNXL3    | Pecanex-like protein 3                                                   | -                          | +                           | -                              | -                              | 1                                           | 11                                           | -                                  |
| P11177                   | PDHB      | Pyruvate dehydrogenase E1 component subunit beta, mitochondrial          | -                          | +                           | -                              | -                              | 1                                           | 0                                            | [1]                                |
| Q00330                   | PDHX      | Pyruvate dehydrogenase protein X component, mitochondrial                | +                          | +                           | -                              | -                              | 0                                           | 0                                            | -                                  |
| Q29RF7                   | PDSSA     | Sister chromatid cohesion protein PDSS homolog A                         | +                          | +                           | +                              | -                              | 2                                           | 0                                            | [1]                                |
| P16284                   | PECAM1    | Platelet endothelial cell adhesion molecule                              | +                          | +                           | -                              | -                              | 1                                           | 1                                            | [5]                                |
| Q01813                   | PFKP      | 6-phosphofructokinase type C                                             | -                          | -                           | +                              | -                              | 5                                           | 0                                            | [1]                                |
| P07737                   | PFN1      | Profilin-1                                                               | -                          | -                           | -                              | +                              | 0                                           | 0                                            | [5], [7], [8]                      |
| P18669                   | PGAM1     | Phosphoglycerate mutase 1                                                | -                          | -                           | -                              | +                              | 0                                           | 0                                            | [7]                                |
| O00264                   | PGRM1C1   | Membrane-associated progesterone receptor component 1                    | -                          | -                           | +                              | -                              | 1                                           | 1                                            | [1]                                |
| P35232                   | PHB       | Prohibitin                                                               | -                          | -                           | -                              | +                              | 1                                           | 0                                            | [7]                                |
| Q9UPP1                   | PHF8      | Histone lysine demethylase PHF8                                          | -                          | +                           | -                              | -                              | 1                                           | 0                                            | -                                  |
| Q9BTU6                   | PI4K2A    | Phosphatidylinositol 4-kinase type 2-alpha                               | +                          | +                           | +                              | -                              | 3                                           | 0                                            | [1], [2], [3], [5]                 |
| Q8TCG2                   | PI4K2B    | Phosphatidylinositol 4-kinase type 2-beta                                | +                          | +                           | +                              | -                              | 4                                           | 0                                            | [1], [2]                           |
| P14618                   | PI6M      | Pyruvate kinase isozymes M1/M2                                           | -                          | -                           | -                              | +                              | 2                                           | 0                                            | [5], [7]                           |
| Q99569                   | PKM4      | Plakophilin-4                                                            | +                          | +                           | -                              | -                              | 0                                           | 0                                            | [8]                                |
| O15162                   | PLSCR1    | Phospholipid scramblase 1                                                | +                          | +                           | -                              | -                              | 7                                           | 0                                            | [5], [6]                           |
| Q9NRY6                   | PLSCR3    | Phospholipid scramblase 3                                                | -                          | +                           | -                              | -                              | 7                                           | 0                                            | [2], [3], [4], [5]                 |
| O15031                   | PLXNB2    | Plexin-B2                                                                | -                          | -                           | +                              | -                              | 1                                           | 0                                            | [8]                                |
| Q9H307                   | PNN       | Pinin                                                                    | -                          | -                           | +                              | -                              | 0                                           | 0                                            | [1]                                |
| O00592                   | PODXL     | Podocalyxin                                                              | +                          | +                           | -                              | -                              | 3                                           | 1                                            | [5]                                |
| A8CG34                   | POM121C   | Nuclear envelope pore membrane protein POM 121C                          | -                          | +                           | -                              | -                              | 0                                           | 1                                            | -                                  |
| P62937                   | PP1A      | Peptidyl-prolyl cis-trans isomerase A                                    | -                          | -                           | -                              | +                              | 1                                           | 0                                            | [7]                                |
| P23284                   | PP1B      | Peptidyl-prolyl cis-trans isomerase B                                    | -                          | -                           | -                              | +                              | 1                                           | 0                                            | [7], [8]                           |
| P62140                   | PPP1CB    | Serine/threonine-protein phosphatase PP1-beta catalytic subunit          | -                          | -                           | -                              | +                              | 1                                           | 0                                            | [7]                                |
| P36873                   | PPP1CC    | Serine/threonine-protein phosphatase                                     | -                          | -                           | -                              | +                              | 1                                           | 0                                            | [7]                                |
| Q96749                   | PPP1R16B  | Protein phosphatase 1 regulatory inhibitor subunit 16B                   | -                          | +                           | -                              | -                              | 2                                           | 0                                            | -                                  |
| Q60831                   | PRAF2     | PRA1 family protein 2                                                    | -                          | -                           | +                              | -                              | 0                                           | 4                                            | [1], [2], [3], [8]                 |
| Q06830                   | PRDX1     | Peroxiredoxin-1                                                          | -                          | -                           | -                              | +                              | 0                                           | 0                                            | [7], [8]                           |
| P32119                   | PRDX2     | Peroxiredoxin-2                                                          | -                          | -                           | -                              | +                              | 0                                           | 0                                            | [7]                                |
| P30048                   | PRDX3     | Thioredoxin-dependent peroxide reductase, mitochondrial                  | -                          | -                           | -                              | +                              | 0                                           | 0                                            | [7]                                |
| P14314                   | PRKCSH    | Glucosidase 2 subunit beta                                               | -                          | -                           | +                              | -                              | 0                                           | 0                                            | [1]                                |
| P78527                   | PRKDC     | DNA-dependent protein kinase catalytic subunit                           | -                          | -                           | +                              | -                              | 7                                           | 0                                            | [1]                                |
| P55345                   | PRMT2     | Protein arginine N-methyltransferase 2                                   | -                          | +                           | -                              | -                              | 0                                           | 0                                            | -                                  |
| Q9UMS4                   | PRPF19    | Pre-mRNA-processing factor 19                                            | -                          | -                           | +                              | -                              | 2                                           | 0                                            | [1], [4]                           |
| P49768                   | PSEN1     | Presenilin-1                                                             | +                          | -                           | +                              | -                              | 1                                           | 9                                            | [1]                                |
| P28066                   | PSMA5     | Proteasome subunit alpha type-5                                          | -                          | -                           | +                              | -                              | 1                                           | 0                                            | [1]                                |
| P60900                   | PSMA6     | Proteasome subunit alpha type-6                                          | -                          | -                           | -                              | +                              | 0                                           | 0                                            | [7]                                |
| P62191                   | PSMC1     | 26S protease regulatory subunit 4                                        | -                          | -                           | +                              | -                              | 0                                           | 0                                            | [1]                                |
| P35998                   | PSMC2     | 26S protease regulatory subunit 7                                        | -                          | -                           | +                              | -                              | 0                                           | 0                                            | [1]                                |
| P17980                   | PSMC3     | 26S protease regulatory subunit 6A                                       | -                          | -                           | +                              | -                              | 0                                           | 0                                            | [1]                                |
| P43686                   | PSMC4     | 26S protease regulatory subunit 6B                                       | -                          | -                           | +                              | -                              | 0                                           | 0                                            | [1]                                |
| P62195                   | PSMC5     | 26S protease regulatory subunit 8                                        | -                          | -                           | +                              | -                              | 0                                           | 0                                            | [1]                                |
| P62333                   | PSMC6     | 26S protease regulatory subunit 10B                                      | -                          | -                           | +                              | -                              | 0                                           | 0                                            | [1]                                |
| Q99460                   | PSMD1     | 26S proteasome non-ATPase regulatory subunit 1                           | -                          | -                           | +                              | -                              | 1                                           | 0                                            | [1]                                |
| Q9UNM6                   | PSMD13    | 26S proteasome non-ATPase regulatory subunit 13                          | -                          | +                           | -                              | -                              | 0                                           | 0                                            | [1]                                |
| Q13200                   | PSMD2     | 26S proteasome non-ATPase regulatory subunit 2                           | -                          | -                           | +                              | -                              | 1                                           | 0                                            | [1]                                |
| Q9UL46                   | PSME2     | Proteasome activator complex subunit 2                                   | -                          | -                           | +                              | +                              | 1                                           | 0                                            | [1], [7]                           |
| Q92530                   | PSMF1     | Proteasome inhibitor PI31 subunit                                        | -                          | +                           | -                              | -                              | 0                                           | 0                                            | -                                  |
| Q43586                   | PSTPIP1   | Proline-serine-threonine phosphatase-interacting protein 1               | -                          | +                           | -                              | -                              | 0                                           | 0                                            | -                                  |
| P26599                   | PTBP1     | Polypyrimidine tract-binding protein 1                                   | -                          | -                           | +                              | -                              | 2                                           | 0                                            | [1], [3]                           |
| Q13308                   | PTK7      | Inactive tyrosine-protein kinase 7                                       | +                          | +                           | -                              | -                              | 2                                           | 2                                            | [1]                                |
| Q9P035                   | PTPLAD1   | Very-long-chain (3R)-3-hydroxyacyl-[acyl-carrier protein] dehydratase 3  | -                          | +                           | -                              | -                              | 0                                           | 5                                            | -                                  |
| P08575                   | PTPRC     | Receptor-type tyrosine-protein phosphatase C                             | -                          | -                           | +                              | -                              | 0                                           | 2                                            | [1]                                |
| Q9Y3E5                   | PTRH2     | Peptidyl-tRNA hydrolase 2, mitochondrial                                 | -                          | -                           | +                              | -                              | 1                                           | 1                                            | [1]                                |
| P53801                   | PTTG1IP   | Pituitary tumor-transforming gene 1 protein-interacting protein          | -                          | -                           | +                              | -                              | 6                                           | 2                                            | [1], [2]                           |
| P15151-3                 | PVR       | Poliovirus receptor                                                      | +                          | -                           | -                              | -                              | 0                                           | 0                                            | -                                  |
| P62820                   | RAB1A     | Ras-related protein Rab-1A                                               | -                          | -                           | -                              | +                              | 2                                           | 0                                            | [5], [7]                           |
| Q9H0U4                   | RAB1B     | Ras-related protein Rab-1B                                               | -                          | -                           | +                              | +                              | 2                                           | 0                                            | [1], [5], [7], [8]                 |
| P57729                   | RAB38     | Ras-related protein Rab-38                                               | -                          | -                           | +                              | -                              | 2                                           | 0                                            | [5]                                |
| P51148                   | RAB5C     | Ras-related protein Rab-5C                                               | -                          | -                           | +                              | -                              | 1                                           | 0                                            | [1], [8]                           |
| P11234                   | RALB      | Ras-related protein Rab-B                                                | +                          | -                           | -                              | -                              | 2                                           | 0                                            | [5], [8]                           |
| Q9UKM9                   | RALY      | RNA-binding protein Raly                                                 | -                          | -                           | +                              | -                              | 0                                           | 0                                            | [1]                                |
| P62826                   | RAN       | GTP-binding nuclear protein Ran                                          | -                          | -                           | -                              | +                              | 0                                           | 0                                            | [5], [7], [8]                      |
| P62834                   | RAP1A     | Ras-related protein Rap-1A                                               | -                          | -                           | +                              | -                              | 1                                           | 0                                            | [1]                                |
| P61224                   | RAP1B     | Ras-related protein Rap-1b                                               | -                          | -                           | +                              | -                              | 1                                           | 0                                            | [1]                                |
| P10114                   | RAP2A     | Ras-related protein Rap-2a                                               | -                          | +                           | +                              | -                              | 2                                           | 0                                            | [1], [2]                           |
| P61225                   | RAP2B     | Ras-related protein Rap-2b                                               | +                          | +                           | +                              | -                              | 3                                           | 0                                            | [1], [2], [3], [5]                 |
| Q9Y3L5                   | RAP2C     | Ras-related protein Rap-2c                                               | +                          | +                           | +                              | -                              | 3                                           | 0                                            | [1], [2], [4], [5]                 |
| Q00765                   | REEP5     | Receptor expression-enhancing protein 5                                  | +                          | +                           | -                              | -                              | 0                                           | 2                                            | [5], [8]                           |
| Q8IUW5                   | RELL1     | RELT-like protein 1                                                      | +                          | +                           | -                              | -                              | 1                                           | 2                                            | [6]                                |
| O15258                   | RER1      | Protein RER1                                                             | -                          | -                           | +                              | -                              | 0                                           | 3                                            | [1]                                |
| Q8WZ73                   | RFFL      | E3 ubiquitin-protein ligase rifflin                                      | -                          | +                           | +                              | -                              | 4                                           | 0                                            | -                                  |
| Q14699                   | RFTN1     | Raftlin                                                                  | +                          | +                           | +                              | -                              | 1                                           | 0                                            | [1], [2]                           |
| P22670                   | RFX1      | MHC class II regulatory factor RFX1                                      | +                          | +                           | +                              | -                              | 0                                           | 0                                            | [1], [5]                           |
| P49795                   | RGS19     | Regulator of G-protein signaling 19                                      | +                          | -                           | -                              | -                              | 9                                           | 0                                            | [1], [2]                           |

| UniProt Accession Number | Gene Name | Protein                                                                      | Enriched in Jurkat T cells | Enriched in Primary T cells | Enriched in Martin et al. 2009 | Enriched in Wilson et al. 2011 | Predicted Palmitoylation Sites <sup>a</sup> | Predicted Transmembrane Helices <sup>b</sup> | Literature References <sup>c</sup> |
|--------------------------|-----------|------------------------------------------------------------------------------|----------------------------|-----------------------------|--------------------------------|--------------------------------|---------------------------------------------|----------------------------------------------|------------------------------------|
| Q6NTF9                   | RHBDD2    | Rhomboid domain-containing protein 2                                         | +                          | -                           | +                              | -                              | 2                                           | 5                                            | [1]                                |
| Q9Y3C5                   | RNF11     | RING finger protein 11                                                       | +                          | +                           | -                              | -                              | 1                                           | 0                                            | [2]                                |
| O75695                   | RP2       | Protein XRP2                                                                 | +                          | -                           | -                              | -                              | 2                                           | 0                                            | -                                  |
| P27635                   | RPL10     | 60S ribosomal protein L10                                                    | -                          | -                           | +                              | +                              | 0                                           | 0                                            | [1], [4], [6], [7]                 |
| P62906                   | RPL10A    | 60S ribosomal protein L10a                                                   | -                          | -                           | +                              | +                              | 0                                           | 0                                            | [1], [4], [6]                      |
| P30050                   | RPL12     | 60S ribosomal protein L12                                                    | -                          | -                           | +                              | +                              | 1                                           | 0                                            | [1], [4], [5], [7]                 |
| P26373                   | RPL13     | 60S ribosomal protein L13                                                    | -                          | -                           | +                              | -                              | 0                                           | 0                                            | [1]                                |
| Q02543                   | RPL18A    | 60S ribosomal protein L18a                                                   | -                          | -                           | +                              | -                              | 0                                           | 0                                            | [1], [4]                           |
| P62829                   | RPL23     | 60S ribosomal protein L23                                                    | -                          | -                           | +                              | -                              | 0                                           | 0                                            | [1]                                |
| P39023                   | RPL3      | 60S ribosomal protein L3                                                     | -                          | -                           | +                              | -                              | 0                                           | 0                                            | [1], [3], [8]                      |
| P46777                   | RPL5      | 60S ribosomal protein L5                                                     | -                          | -                           | +                              | -                              | 0                                           | 0                                            | [1], [8]                           |
| Q02878                   | RPL6      | 60S ribosomal protein L6                                                     | -                          | -                           | +                              | -                              | 1                                           | 0                                            | [1], [8]                           |
| P05388                   | RPLP0     | 60S acidic ribosomal protein P0                                              | -                          | -                           | +                              | +                              | 0                                           | 0                                            | [4], [7]                           |
| P04843                   | RPN1      | Dolichyl-diphosphooligosaccharide--protein glycosyltransferase subunit 1     | -                          | -                           | +                              | +                              | 0                                           | 1                                            | [7], [8]                           |
| P62249                   | RPS16     | 40S ribosomal protein S16                                                    | -                          | -                           | +                              | +                              | 0                                           | 0                                            | [1], [6], [7]                      |
| P08708                   | RPS17     | 40S ribosomal protein S17                                                    | -                          | -                           | +                              | -                              | 0                                           | 0                                            | [5]                                |
| P15880                   | RPS2      | 40S ribosomal protein S2                                                     | -                          | -                           | +                              | -                              | 0                                           | 0                                            | [1], [4]                           |
| P62266                   | RPS23     | 40S ribosomal protein S23                                                    | -                          | -                           | +                              | -                              | 1                                           | 0                                            | [1], [6], [8]                      |
| P62857                   | RPS28     | 40S ribosomal protein S28                                                    | -                          | -                           | +                              | -                              | 0                                           | 0                                            | [1]                                |
| P23396                   | RPS3      | 40S ribosomal protein S3                                                     | -                          | -                           | +                              | -                              | 0                                           | 0                                            | [7]                                |
| P61247                   | RPS3A     | 40S ribosomal protein S3a                                                    | -                          | -                           | +                              | +                              | 0                                           | 0                                            | [1], [7]                           |
| P62701                   | RPS4X     | 40S ribosomal protein S4, X isoform                                          | -                          | -                           | +                              | +                              | 1                                           | 0                                            | [7]                                |
| P46782                   | RPS5      | 40S ribosomal protein S5                                                     | -                          | -                           | +                              | -                              | 1                                           | 0                                            | [1], [6]                           |
| P62753                   | RPS6      | 40S ribosomal protein S6                                                     | -                          | -                           | +                              | -                              | 1                                           | 0                                            | [1], [5]                           |
| P62241                   | RPS8      | 40S ribosomal protein S8                                                     | -                          | -                           | +                              | +                              | 0                                           | 0                                            | [7]                                |
| P46781                   | RPS9      | 40S ribosomal protein S9                                                     | -                          | -                           | +                              | -                              | 1                                           | 0                                            | [1]                                |
| P10301                   | RRAS      | Ras-related protein R-Ras                                                    | +                          | +                           | +                              | -                              | 2                                           | 0                                            | [1], [2], [3], [5], [8]            |
| P62070                   | RRAS2     | Ras-related protein R-Ras2                                                   | +                          | +                           | +                              | -                              | 2                                           | 0                                            | [5], [8]                           |
| Q5JTH9                   | RRP12     | RRP12-like protein                                                           | -                          | -                           | +                              | -                              | 0                                           | 0                                            | [1]                                |
| Q96DX4                   | RSPRY1    | RING finger and SPRY domain-containing protein 1                             | +                          | +                           | +                              | -                              | 3                                           | 0                                            | [1]                                |
| Q9NQC3                   | RTN4      | Reticulon-4                                                                  | -                          | +                           | +                              | -                              | 0                                           | 2                                            | [1], [5]                           |
| Q9Y230                   | RUVBL2    | RuvB-like 2                                                                  | -                          | -                           | +                              | -                              | 0                                           | 0                                            | [1], [4]                           |
| Q95977                   | S1PR4     | Sphingosine 1-phosphate receptor 4                                           | -                          | +                           | +                              | -                              | 3                                           | 7                                            | -                                  |
| Q9NTJ5                   | SACM1L    | Phosphatidylinositol phosphatase SAC1                                        | -                          | -                           | +                              | -                              | 0                                           | 2                                            | [1]                                |
| Q99590                   | SCAF11    | Protein SCAF11                                                               | +                          | -                           | +                              | -                              | 3                                           | 0                                            | -                                  |
| O15126                   | SCAMP1    | Secretory carrier-associated membrane protein 1                              | -                          | +                           | +                              | -                              | 0                                           | 4                                            | [1], [2], [3], [8]                 |
| O15127                   | SCAMP2    | Secretory carrier-associated membrane protein 2                              | +                          | +                           | +                              | -                              | 0                                           | 4                                            | [1], [2], [3], [8]                 |
| O14828                   | SCAMP3    | Secretory carrier-associated membrane protein 3                              | +                          | +                           | +                              | -                              | 0                                           | 4                                            | [1], [2], [3], [8]                 |
| Q969E2                   | SCAMP4    | Secretory carrier-associated membrane protein 4                              | -                          | +                           | +                              | -                              | 0                                           | 4                                            | [2]                                |
| Q8WTV0                   | SCARB1    | Scavenger receptor class B member 1                                          | +                          | +                           | -                              | -                              | 1                                           | 2                                            | [3]                                |
| Q14108                   | SCARB2    | Lysosome membrane protein 2                                                  | +                          | +                           | -                              | -                              | 3                                           | 2                                            | [5], [8]                           |
| Q8NBX0                   | SCCPDH    | Saccharopine dehydrogenase-like oxidoreductase                               | -                          | -                           | +                              | -                              | 0                                           | 1                                            | [1]                                |
| Q14160                   | SCRIB     | Protein scribble homolog                                                     | +                          | +                           | +                              | -                              | 1                                           | 0                                            | [1], [4]                           |
| Q9H190                   | SDCBP2    | Syntenin-2                                                                   | -                          | +                           | +                              | -                              | 0                                           | 0                                            | -                                  |
| Q6IQ49-3                 | SDE2      | Protein SDE2 homolog                                                         | +                          | +                           | +                              | -                              | 1                                           | 0                                            | -                                  |
| Q92854                   | SEMA4D    | Semaphorin-4D                                                                | +                          | +                           | +                              | -                              | 2                                           | 2                                            | [1], [2], [8]                      |
| Q9NVA2                   | SEPT11    | Septin-11                                                                    | -                          | +                           | +                              | -                              | 0                                           | 0                                            | -                                  |
| Q8NC51                   | SERBP1    | Plasminogen activator inhibitor 1 RNA-binding protein                        | -                          | +                           | +                              | -                              | 1                                           | 0                                            | [1]                                |
| Q9NRX5                   | SERINC1   | Serine incorporator 1                                                        | +                          | +                           | +                              | -                              | 5                                           | 11                                           | -                                  |
| O75533                   | SF3B1     | Splicing factor 3B subunit 1                                                 | -                          | -                           | +                              | -                              | 0                                           | 0                                            | [1]                                |
| Q15393                   | SF3B3     | Splicing factor 3B subunit 3                                                 | -                          | -                           | +                              | +                              | 0                                           | 0                                            | [7]                                |
| P31947                   | SFN       | 14-3-3 protein sigma                                                         | -                          | -                           | +                              | +                              | 0                                           | 0                                            | [7]                                |
| P23246                   | SFPQ      | Splicing factor, proline- and glutamine-rich                                 | -                          | -                           | +                              | -                              | 0                                           | 0                                            | [1]                                |
| Q8WV19                   | SFT2D1    | Vesicle transport protein SFT2A                                              | -                          | -                           | +                              | -                              | 2                                           | 4                                            | [5]                                |
| Q58719                   | SFT2D3    | Vesicle transport protein SFT2C                                              | +                          | +                           | +                              | -                              | 1                                           | 4                                            | [1], [2], [4]                      |
| P34897                   | SHMT2     | Serine hydroxymethyltransferase, mitochondrial                               | -                          | -                           | +                              | -                              | 1                                           | 0                                            | [1]                                |
| Q8NB09                   | SIDT2     | SID1 transmembrane family member 2                                           | -                          | +                           | +                              | -                              | 2                                           | 9                                            | [8]                                |
| Q6IA17                   | SIGIRR    | Single Ig IL-1-related receptor                                              | +                          | +                           | +                              | -                              | 2                                           | 1                                            | -                                  |
| Q8N697                   | SLC15A4   | Solute carrier family 15 member 4                                            | -                          | +                           | +                              | -                              | 2                                           | 13                                           | -                                  |
| O15427                   | SLC16A3   | Monocarboxylate transporter 4 (Fragment)                                     | -                          | +                           | +                              | -                              | 1                                           | 12                                           | -                                  |
| P41440                   | SLC19A1   | Folate transporter 1                                                         | +                          | -                           | +                              | -                              | 0                                           | 11                                           | -                                  |
| P43007                   | SLC1A4    | Neutral amino acid transporter A                                             | -                          | -                           | +                              | -                              | 0                                           | 9                                            | [1], [8]                           |
| Q15758                   | SLC1A5    | Neutral amino acid transporter B(0)                                          | +                          | +                           | +                              | +                              | 0                                           | 9                                            | [1], [3], [4], [5], [7]            |
| Q02978                   | SLC25A11  | Mitochondrial 2-oxoglutarate/malate carrier protein                          | -                          | -                           | +                              | -                              | 0                                           | 0                                            | [1]                                |
| Q00325                   | SLC25A3   | Phosphate carrier protein, mitochondrial                                     | -                          | -                           | +                              | -                              | 0                                           | 2                                            | [1], [8]                           |
| P12235                   | SLC25A4   | ADP/ATP translocase 1                                                        | -                          | -                           | +                              | +                              | 0                                           | 3                                            | [7]                                |
| P05141                   | SLC25A5   | ADP/ATP translocase 2                                                        | -                          | -                           | +                              | +                              | 0                                           | 3                                            | [7]                                |
| P12236                   | SLC25A6   | ADP/ATP translocase 3                                                        | -                          | -                           | +                              | +                              | 0                                           | 2                                            | [1], [7]                           |
| Q6NX14                   | SLC30A6   | Zinc transporter 6                                                           | -                          | +                           | +                              | -                              | 3                                           | 6                                            | -                                  |
| Q8TB61                   | SLC35B2   | Adenosine 3'-phospho 5'-phosphosulfate transporter 1                         | -                          | +                           | +                              | -                              | 0                                           | 8                                            | [1], [3], [4]                      |
| Q8TB61-3                 | SLC35B2   | Adenosine 3-phospho 5-phosphosulfate transporter 1 (Isoform 3)               | +                          | +                           | +                              | -                              | 0                                           | 7                                            | -                                  |
| Q96K37                   | SLC35E1   | Solute carrier family 35 member E1                                           | -                          | +                           | +                              | -                              | 0                                           | 6                                            | -                                  |
| POCK97                   | SLC35E2   | Solute carrier family 35 member E2                                           | -                          | +                           | +                              | -                              | 1                                           | 3                                            | [5]                                |
| POCK96                   | SLC35E2B  | Solute carrier family 35 member E2B                                          | -                          | +                           | +                              | -                              | 1                                           | 8                                            | -                                  |
| Q96QD8                   | SLC38A2   | Sodium-coupled neutral amino acid transporter 2                              | +                          | +                           | +                              | -                              | 0                                           | 9                                            | [1], [6]                           |
| Q9ULF5                   | SLC39A10  | Zinc transporter ZIP10                                                       | +                          | +                           | +                              | -                              | 2                                           | 7                                            | [8]                                |
| Q96G26                   | SLC41A3   | Solute carrier family 41 member 3                                            | -                          | +                           | +                              | -                              | 0                                           | 10                                           | -                                  |
| Q8NB15                   | SLC43A3   | Solute carrier family 43 member 3                                            | +                          | +                           | +                              | -                              | 1                                           | 11                                           | [1], [2]                           |
| Q8WW15                   | SLC44A1   | Choline transporter-like protein 1                                           | +                          | +                           | +                              | -                              | 9                                           | 9                                            | [2], [3], [8]                      |
| Q8IWAS                   | SLC44A2   | Choline transporter-like protein 2                                           | +                          | +                           | +                              | -                              | 6                                           | 11                                           | [2], [8]                           |
| Q9Y289                   | SLC5A6    | Sodium-dependent multivitamin transporter                                    | -                          | -                           | +                              | -                              | 1                                           | 14                                           | [1], [4], [4]                      |
| P30825                   | SLC7A1    | High affinity cationic amino acid transporter 1                              | +                          | +                           | +                              | -                              | 2                                           | 14                                           | [1], [4], [8]                      |
| Q92581                   | SLC9A6    | Sodium/hydrogen exchanger 6                                                  | -                          | +                           | +                              | -                              | 1                                           | 12                                           | [1], [8]                           |
| Q92581-3                 | SLC9A6    | Sodium/hydrogen exchanger 6 (Isoform 3)                                      | -                          | +                           | +                              | -                              | 1                                           | 11                                           | -                                  |
| Q92581-2                 | SLC9A6    | Isoform 2 of Sodium/hydrogen exchanger 6                                     | -                          | +                           | +                              | -                              | 1                                           | 12                                           | -                                  |
| Q8IVB4                   | SLC9A9    | Sodium/hydrogen exchanger 9                                                  | -                          | +                           | +                              | -                              | 0                                           | 10                                           | [2]                                |
| Q9UIG8                   | SLCO3A1   | Solute carrier organic anion transporter family member 3A1                   | -                          | +                           | +                              | -                              | 2                                           | 12                                           | -                                  |
| P51532                   | SMARCA4   | Transcription activator BRG1                                                 | -                          | -                           | +                              | -                              | 0                                           | 0                                            | [5]                                |
| B2RUZ4                   | SMIM1     | Small integral membrane protein 1                                            | -                          | -                           | +                              | -                              | 1                                           | 1                                            | -                                  |
| Q9NY59                   | SMPD3     | Sphingomyelin phosphodiesterase 3                                            | -                          | +                           | +                              | -                              | 6                                           | 2                                            | -                                  |
| O00161                   | SNAP23    | Synaptosomal-associated protein 23                                           | +                          | +                           | +                              | +                              | 6                                           | 0                                            | [1], [2], [3], [4], [5], [6], [7]  |
| P60880-2                 | SNAP25    | Synaptosomal-associated protein 25 (Isoform 2)                               | +                          | +                           | +                              | -                              | 4                                           | 0                                            | -                                  |
| O75643                   | SNRNP200  | U5 small nuclear ribonucleoprotein 200 kDa helicase                          | -                          | -                           | +                              | -                              | 2                                           | 0                                            | [1]                                |
| P62308                   | SNRPG     | Small nuclear ribonucleoprotein G                                            | -                          | -                           | +                              | -                              | 0                                           | 0                                            | [1]                                |
| Q9Y5W9                   | SNX11     | Sorting nexin-11                                                             | +                          | +                           | +                              | -                              | 2                                           | 0                                            | -                                  |
| Q99523                   | SORT1     | Sortilin                                                                     | +                          | +                           | +                              | -                              | 1                                           | 1                                            | [1], [2], [8]                      |
| Q8TCT8                   | SPPL2A    | Signal peptide peptidase-like 2A                                             | -                          | -                           | +                              | -                              | 1                                           | 9                                            | -                                  |
| Q7Z698                   | SPRED2    | Sprouty-related, EVH1 domain-containing protein 2                            | +                          | +                           | +                              | -                              | 3                                           | 0                                            | [8]                                |
| Q43609                   | SPRY1     | Protein sprouty homolog 1                                                    | +                          | +                           | +                              | -                              | 1                                           | 0                                            | -                                  |
| Q5W111                   | SPRYD7    | SPRY domain-containing protein 7                                             | +                          | +                           | +                              | -                              | 2                                           | 0                                            | [4]                                |
| Q13813                   | SPTAN1    | Spectrin alpha chain, non-erythrocytic 1                                     | -                          | -                           | -                              | +                              | 0                                           | 0                                            | [7]                                |
| Q9NUV7                   | SPTLC3    | Serine palmitoyltransferase 3 (Fragment)                                     | -                          | +                           | +                              | -                              | 0                                           | 0                                            | -                                  |
| Q9Y5M8                   | SRPRB     | Signal recognition particle receptor subunit beta                            | -                          | -                           | +                              | -                              | 0                                           | 1                                            | [1]                                |
| Q13247                   | SRSF6     | Serine/arginine-rich splicing factor 6                                       | -                          | -                           | +                              | -                              | 0                                           | 0                                            | [1]                                |
| O95772                   | STAR3NL   | MLN64 N-terminal domain homolog                                              | -                          | +                           | +                              | -                              | 0                                           | 4                                            | [2]                                |
| O75716                   | STK16     | Serine/threonine-protein kinase 16                                           | -                          | -                           | +                              | -                              | 0                                           | 0                                            | -                                  |
| Q9NZ72                   | STMN3     | Stathmin                                                                     | +                          | +                           | +                              | -                              | 1                                           | 0                                            | -                                  |
| P27105                   | STOM      | Erythrocyte band 7 integral membrane protein                                 | -                          | +                           | +                              | -                              | 2                                           | 1                                            | [1], [2], [3], [4], [5]            |
| Q9UJ21                   | STOML2    | Stomatin-like protein 2, mitochondrial                                       | -                          | -                           | +                              | -                              | 0                                           | 0                                            | [1]                                |
| Q8TCI2                   | STT3B     | Dolichyl-diphosphooligosaccharide--protein glycosyltransferase subunit STT3B | -                          | -                           | +                              | -                              | 1                                           | 10                                           | [1]                                |
| O60499                   | STX10     | Syntaxin-10                                                                  | +                          | +                           | +                              | -                              | 1                                           | 1                                            | [1], [2]                           |
| O75558                   | STX11     | Syntaxin-11                                                                  | +                          | +                           | +                              | -                              | 6                                           | 0                                            | [2], [5]                           |
| Q86Y82                   | STX12     | Syntaxin-12                                                                  | +                          | +                           | +                              | -                              | 1                                           | 1                                            | [1], [2], [3], [5], [8]            |
| P32856-3                 | STX2      | Syntaxin-2 (Isoform 3)                                                       | +                          | +                           | +                              | -                              | 0                                           | 0                                            | -                                  |
| Q12846                   | STX4      | Syntaxin-4                                                                   | +                          | +                           | +                              | -                              | 1                                           | 1                                            | [1]                                |
| O43752                   | STX6      | Syntaxin-6                                                                   | +                          | +                           | +                              | -                              | 1                                           | 1                                            | [1], [3], [5], [8]                 |
| O15400                   | STX7      | Syntaxin-7                                                                   | +                          | +                           | +                              | -                              | 1                                           | 1                                            | [1], [3], [8]                      |
| Q9UNK0                   | STX8      | Syntaxin-8                                                                   | +                          | +                           | +                              | -                              | 1                                           | 1                                            | [1], [2], [3], [8]                 |
| O15260                   | SURF4     | Surfeit locus protein 4                                                      | -                          | +                           | +                              | -                              | 0                                           | 5                                            | [1], [8]                           |
| Q96L08                   | SUSD3     | Sushi domain-containing protein 3                                            | -                          | +                           | +                              | -                              | 2                                           | 1                                            | [2]                                |

| UniProt Accession Number | Gene Name | Protein                                                                  | Enriched in Jurkat T cells | Enriched in Primary T cells | Enriched in Martin et al. 2009 | Enriched in Wilson et al. 2011 | Predicted Palmitoylation Sites <sup>a</sup> | Predicted Transmembrane Helices <sup>b</sup> | Literature References <sup>c</sup> |
|--------------------------|-----------|--------------------------------------------------------------------------|----------------------------|-----------------------------|--------------------------------|--------------------------------|---------------------------------------------|----------------------------------------------|------------------------------------|
| Q8NHG7                   | SVIP      | Small VCP/p97-interacting protein                                        | +                          | -                           | -                              | -                              | 1                                           | 0                                            | [2], [5]                           |
| Q6ZM23                   | SYNE3     | Nesprin-3                                                                | -                          | +                           | -                              | -                              | 1                                           | 1                                            | -                                  |
| Q03518                   | TAP1      | Antigen peptide transporter 1                                            | -                          | -                           | +                              | -                              | 1                                           | 7                                            | [1]                                |
| Q6NXT6                   | TAPT1     | Transmembrane anterior posterior transformation protein 1 homolog        | -                          | +                           | -                              | -                              | 1                                           | 5                                            | -                                  |
| P17987                   | TCP1      | T-complex protein 1 subunit alpha                                        | -                          | -                           | -                              | +                              | 0                                           | 0                                            | [7], [8]                           |
| Q96852                   | TESC      | Calcineurin B homologous protein 3                                       | +                          | +                           | -                              | -                              | 1                                           | 0                                            | -                                  |
| P02787                   | TF        | Serotransferrin                                                          | -                          | -                           | -                              | -                              | 2                                           | 0                                            | -                                  |
| Q9H5Q4                   | TFB2M     | Dimethyladenosine transferase 2, mitochondrial                           | +                          | -                           | -                              | -                              | 0                                           | 0                                            | -                                  |
| P02786                   | TFRC      | Transferrin receptor protein 1                                           | -                          | +                           | +                              | -                              | 0                                           | 1                                            | [1], [2], [5]                      |
| Q8WUY1                   | THEM6     | Protein THEM6                                                            | -                          | +                           | -                              | -                              | 0                                           | 1                                            | -                                  |
| Q9Y490                   | TLN1      | Talin-1                                                                  | -                          | -                           | -                              | +                              | 4                                           | 0                                            | [7]                                |
| Q99805                   | TM9SF2    | Transmembrane 9 superfamily member 2                                     | -                          | +                           | -                              | -                              | 0                                           | 9                                            | [6], [8]                           |
| Q72403                   | TMC6      | Transmembrane channel-like protein 6                                     | -                          | +                           | -                              | -                              | 0                                           | 10                                           | -                                  |
| Q8IU68                   | TMC8      | Transmembrane channel-like protein 8                                     | -                          | +                           | -                              | -                              | 1                                           | 8                                            | -                                  |
| Q13445                   | TMED1     | Transmembrane emp24 domain-containing protein 1                          | +                          | -                           | +                              | -                              | 1                                           | 1                                            | [1]                                |
| Q12893                   | TMEM115   | Transmembrane protein 115                                                | -                          | -                           | +                              | -                              | 1                                           | 6                                            | [1]                                |
| Q9HGK4                   | TMEM134   | Transmembrane protein 134                                                | +                          | +                           | -                              | -                              | 2                                           | 2                                            | -                                  |
| Q727N9                   | TMEM179B  | Transmembrane protein 179B                                               | -                          | +                           | -                              | -                              | 2                                           | 3                                            | -                                  |
| Q8IY95                   | TMEM192   | Transmembrane protein 192                                                | +                          | -                           | -                              | -                              | 1                                           | 4                                            | -                                  |
| Q9H813                   | TMEM206   | Transmembrane protein 206                                                | +                          | -                           | +                              | -                              | 0                                           | 1                                            | [1]                                |
| Q9H0R3                   | TMEM222   | Transmembrane protein 222                                                | -                          | +                           | +                              | -                              | 1                                           | 3                                            | [1], [2]                           |
| Q9H330                   | TMEM245   | Transmembrane protein 245                                                | -                          | +                           | -                              | -                              | 2                                           | 14                                           | -                                  |
| Q86703                   | TMEM55B   | Transmembrane protein 55B                                                | -                          | +                           | +                              | -                              | 1                                           | 2                                            | [1], [2], [3], [8]                 |
| O94886                   | TMEM63A   | Transmembrane protein 63A                                                | +                          | +                           | +                              | -                              | 4                                           | 11                                           | [1], [2]                           |
| Q8NBN3                   | TMEM87A   | Transmembrane protein 87A                                                | -                          | -                           | -                              | -                              | 0                                           | 7                                            | -                                  |
| Q96BF3                   | TMIGD2    | Transmembrane and immunoglobulin domain-containing protein 2             | +                          | +                           | -                              | -                              | 0                                           | 1                                            | -                                  |
| Q6ZT21                   | TMPEE     | Transmembrane protein with metallophosphoesterase domain                 | -                          | -                           | -                              | -                              | 1                                           | 5                                            | [2]                                |
| Q9H3N1                   | TMX1      | Thioredoxin-related transmembrane protein 1                              | +                          | +                           | +                              | +                              | 0                                           | 3                                            | [1], [2], [3], [5], [7], [8]       |
| Q96J7                    | TMX3      | Protein disulfide-isomerase TMX3                                         | +                          | +                           | +                              | -                              | 1                                           | 1                                            | [1], [2]                           |
| Q9H1E5                   | TMX4      | Thioredoxin-related transmembrane protein 4                              | +                          | +                           | +                              | -                              | 1                                           | 1                                            | [1], [2]                           |
| P28908                   | TNFRSF8   | Tumor necrosis factor receptor superfamily member 8                      | +                          | -                           | -                              | -                              | 1                                           | 1                                            | -                                  |
| O43557                   | TNFSF14   | Tumor necrosis factor ligand superfamily member 14                       | -                          | +                           | -                              | -                              | 0                                           | 1                                            | -                                  |
| O96008                   | TOMM40    | Mitochondrial import receptor subunit TOM40 homolog                      | -                          | -                           | +                              | -                              | 0                                           | 0                                            | [1]                                |
| P60174                   | TP1       | Triosephosphate isomerase                                                | -                          | -                           | -                              | +                              | 0                                           | 0                                            | [7]                                |
| Q9Y228                   | TRAF3IP3  | TRAF3-interacting JNK-activating modulator                               | +                          | +                           | +                              | -                              | 0                                           | 1                                            | [1]                                |
| Q12931                   | TRAP1     | Heat shock protein 75 kDa, mitochondrial                                 | -                          | -                           | +                              | -                              | 0                                           | 0                                            | [1]                                |
| O43617                   | TRAPP3    | Trafficking protein particle complex subunit 3                           | +                          | -                           | -                              | -                              | 1                                           | 0                                            | [2], [3], [5]                      |
| Q86YW5                   | TREM1L1   | Trem-like transcript 1 protein                                           | -                          | +                           | -                              | -                              | 0                                           | 1                                            | -                                  |
| P49815                   | TSC2      | Tuberin                                                                  | -                          | +                           | -                              | -                              | 0                                           | 0                                            | -                                  |
| Q8NG11                   | TSPAN14   | Tetraspanin-14                                                           | +                          | -                           | -                              | -                              | 1                                           | 4                                            | [2], [6]                           |
| Q95858                   | TSPAN15   | Tetraspanin-15                                                           | +                          | -                           | -                              | -                              | 3                                           | 4                                            | [2]                                |
| Q965I8                   | TSPAN18   | Tetraspanin-18 (Fragment)                                                | -                          | +                           | -                              | -                              | 6                                           | 4                                            | -                                  |
| Q86UF1                   | TSPAN33   | Tetraspanin-33                                                           | +                          | +                           | -                              | -                              | 3                                           | 4                                            | [2]                                |
| P41732                   | TSPAN7    | Tetraspanin-7                                                            | +                          | -                           | -                              | -                              | 4                                           | 4                                            | -                                  |
| O75954                   | TSPAN9    | Tetraspanin-9                                                            | -                          | +                           | -                              | -                              | 4                                           | 4                                            | [2]                                |
| Q8NFU3                   | TSTD1     | Thiosulfate sulfurtransferase/rhodanese-like domain-containing protein 1 | +                          | -                           | -                              | -                              | 0                                           | 0                                            | -                                  |
| Q8WZ42                   | TTN       | Titin                                                                    | -                          | -                           | +                              | -                              | 13                                          | 0                                            | [1]                                |
| Q9C0H2                   | TTYH3     | Protein tweety homolog 3                                                 | -                          | +                           | -                              | -                              | 3                                           | 5                                            | [2], [8]                           |
| Q71U36                   | TUBA1A    | Tubulin alpha-1A chain                                                   | -                          | -                           | -                              | +                              | 8                                           | 0                                            | [7]                                |
| P49411                   | TUFM      | Elongation factor Tu, mitochondrial                                      | -                          | -                           | +                              | -                              | 0                                           | 0                                            | [1], [6]                           |
| O15042                   | U2SURP    | U2 snRNP-associated SURP motif-containing protein                        | -                          | -                           | +                              | -                              | 0                                           | 0                                            | [1]                                |
| Q9Y3C8                   | UFC1      | Ubiquitin-fold modifier-conjugating enzyme 1                             | +                          | +                           | -                              | -                              | 1                                           | 0                                            | -                                  |
| O75385                   | ULK1      | Serine/threonine-protein kinase ULK1                                     | -                          | +                           | -                              | -                              | 3                                           | 0                                            | -                                  |
| Q96IX5                   | USMG5     | Up-regulated during skeletal muscle growth protein 5                     | -                          | -                           | +                              | -                              | 0                                           | 1                                            | [1], [8]                           |
| P63027                   | VAMP2     | Vesicle-associated membrane protein 2                                    | -                          | +                           | +                              | -                              | 0                                           | 1                                            | [1], [5], [8]                      |
| Q15836                   | VAMP3     | Vesicle-associated membrane protein 3                                    | +                          | +                           | +                              | -                              | 0                                           | 1                                            | [1], [2], [3], [5]                 |
| O75379                   | VAMP4     | Vesicle-associated membrane protein 4                                    | +                          | +                           | +                              | -                              | 0                                           | 1                                            | [1], [2], [3], [8]                 |
| O95183                   | VAMP5     | Vesicle-associated membrane protein 5                                    | +                          | -                           | +                              | -                              | 0                                           | 1                                            | [1], [2], [3]                      |
| P51809                   | VAMP7     | Vesicle-associated membrane protein 7                                    | -                          | -                           | +                              | -                              | 3                                           | 1                                            | [1], [2], [3], [8]                 |
| Q87A49                   | VANGL1    | Vang-like protein 1                                                      | -                          | -                           | +                              | -                              | 0                                           | 4                                            | [1]                                |
| Q9P0L0                   | VAPA      | Vesicle-associated membrane protein-associated protein A                 | -                          | -                           | +                              | -                              | 0                                           | 1                                            | [1], [4], [8]                      |
| Q99536                   | VAT1      | Synaptic vesicle membrane protein VAT-1 homolog                          | -                          | -                           | -                              | +                              | 0                                           | 0                                            | [7]                                |
| P55072                   | VCP       | Transitional endoplasmic reticulum ATPase                                | -                          | -                           | -                              | +                              | 0                                           | 0                                            | [7]                                |
| P21796                   | VDAC1     | Voltage-dependent anion-selective channel protein 1                      | -                          | -                           | -                              | +                              | 0                                           | 0                                            | [7], [8]                           |
| P45880                   | VDAC2     | Voltage-dependent anion-selective channel protein 2                      | -                          | -                           | -                              | +                              | 1                                           | 0                                            | [5], [7], [8]                      |
| Q9Y277                   | VDAC3     | Voltage-dependent anion-selective channel protein 3                      | -                          | -                           | -                              | +                              | 1                                           | 0                                            | [5], [7], [8]                      |
| P08670                   | VIM       | Vimentin                                                                 | -                          | -                           | +                              | -                              | 0                                           | 0                                            | [1]                                |
| O14980                   | XPO1      | Exportin-1                                                               | -                          | -                           | +                              | -                              | 0                                           | 0                                            | [1], [8]                           |
| P13010                   | XRCC5     | X-ray repair cross-complementing protein 5                               | -                          | -                           | -                              | +                              | 0                                           | 0                                            | [7]                                |
| P12956                   | XRCC6     | X-ray repair cross-complementing protein 6                               | -                          | -                           | -                              | +                              | 0                                           | 0                                            | [7]                                |
| P07947                   | YES1      | Tyrosine-protein kinase Yes                                              | -                          | -                           | +                              | -                              | 1                                           | 0                                            | [1], [2], [4], [5]                 |
| P31946                   | YWHAB     | 14-3-3 protein beta/alpha                                                | -                          | -                           | -                              | +                              | 0                                           | 0                                            | [7]                                |
| P62258                   | YWHAE     | 14-3-3 protein epsilon                                                   | -                          | -                           | -                              | +                              | 2                                           | 0                                            | [7]                                |
| P61981                   | YWHAG     | 14-3-3 protein gamma                                                     | -                          | -                           | +                              | -                              | 1                                           | 0                                            | [1], [7]                           |
| Q04917                   | YWHAH     | 14-3-3 protein eta                                                       | -                          | -                           | -                              | +                              | 1                                           | 0                                            | [7]                                |
| P27348                   | YWHAQ     | 14-3-3 protein theta                                                     | -                          | -                           | -                              | +                              | 1                                           | 0                                            | [7]                                |
| P63104                   | YWHAZ     | 14-3-3 protein zeta/delta                                                | -                          | -                           | -                              | +                              | 0                                           | 0                                            | [5], [7]                           |
| Q8IUH4                   | ZDHHC13   | Palmitoyltransferase ZDHHC13                                             | +                          | -                           | -                              | -                              | 1                                           | 6                                            | -                                  |
| Q8IUH5                   | ZDHHC17   | Palmitoyltransferase ZDHHC17                                             | +                          | +                           | +                              | -                              | 0                                           | 6                                            | [1]                                |
| Q9NUE0                   | ZDHHC18   | Palmitoyltransferase ZDHHC18                                             | -                          | +                           | +                              | -                              | 2                                           | 4                                            | -                                  |
| Q5W029                   | ZDHHC20   | Probable palmitoyltransferase ZDHHC20                                    | -                          | +                           | +                              | -                              | 2                                           | 4                                            | [1]                                |
| Q9C0B5                   | ZDHHC5    | Palmitoyltransferase ZDHHC5                                              | +                          | +                           | +                              | -                              | 2                                           | 4                                            | [1], [4]                           |
| Q9H6R6                   | ZDHHC6    | Palmitoyltransferase ZDHHC6                                              | -                          | -                           | +                              | -                              | 2                                           | 4                                            | [1], [4]                           |

**Supplementary Table 3**

Analysis of palmitoylated proteins enriched in Jurkat T cells and primary T cells. Novel candidates (not reported in the eight published proteomic studies analyzed here) with at least one predicted palmitoylation site are shown in blue. <sup>a</sup>Palmitoylation sites predicted using CSS-Palm (version 3.0), with a "High" threshold and a cutoff score of 1.0. <sup>b</sup>Prediction of transmembrane domains was performed using TMHMM Server (version 2.0). <sup>c</sup>References: [1] Martin and Cravatt, Nat. Meth., 2009, [2] Dowal et al., Blood, 2011, [3] Merrick et al., Mol. & Cell. Proteom., 2011, [4] Yang et al., Mol. & Cell. Proteom., 2010, [5] Marin et al., Circ. Res., 2012, [6] Forrester et al., J. Lip. Res., 2011, [7] Wilson et al., Mol. & Cell. Proteom., 2011, [8] Kang et al., Nature, 2008.

| UniProt Accession Number | Gene Name | Protein                                                                     | Enriched in Jurkat T cells | Enriched in Primary T cells | Predicted Palmitoylation Sites <sup>a</sup> | Predicted Transmembrane Helices <sup>b</sup> | Literature References <sup>c</sup> |
|--------------------------|-----------|-----------------------------------------------------------------------------|----------------------------|-----------------------------|---------------------------------------------|----------------------------------------------|------------------------------------|
| Q9NP58                   | ABC6      | ATP-binding cassette sub-family B member 6, mitochondrial                   | +                          | -                           | 0                                           | 9                                            | [2]                                |
| O15439                   | ABCC4     | Multidrug resistance-associated protein 4                                   | -                          | +                           | 2                                           | 11                                           | [2]                                |
| Q95870                   | ABHD16A   | Abhydrolase domain-containing protein 16A                                   | -                          | +                           | 1                                           | 2                                            | [1], [8]                           |
| Q96GS6                   | ABHD17A   | Alpha/beta hydrolase domain-containing protein 17A                          | +                          | +                           | 4                                           | 0                                            | [1]                                |
| Q5VST6                   | ABHD17B   | Alpha/beta hydrolase domain-containing protein 17B                          | +                          | +                           | 4                                           | 0                                            | [1], [3], [7]                      |
| P09110                   | ACAA1     | 3-ketoacyl-CoA thiolase, peroxisomal                                        | +                          | +                           | 0                                           | 0                                            | -                                  |
| P24752                   | ACAT1     | Acetyl-CoA acetyltransferase, mitochondrial                                 | +                          | +                           | 0                                           | 0                                            | -                                  |
| Q9BWD1                   | ACAT2     | Acetyl-CoA acetyltransferase, cytosolic                                     | +                          | +                           | 2                                           | 0                                            | -                                  |
| O14734                   | ACOT8     | Acyl-coenzyme A thioesterase 8                                              | -                          | +                           | 0                                           | 0                                            | -                                  |
| P33121                   | ACSL1     | Long-chain-fatty-acid-CoA ligase 1                                          | -                          | +                           | 0                                           | 1                                            | -                                  |
| O43707                   | ACTN4     | Alpha-actinin-4                                                             | -                          | +                           | 0                                           | 0                                            | [4], [5]                           |
| O14672                   | ADAM10    | Disintegrin and metalloproteinase domain-containing protein 10              | -                          | +                           | 2                                           | 1                                            | [1], [8]                           |
| P78536                   | ADAM17    | Disintegrin and metalloproteinase domain-containing protein 17              | +                          | +                           | 4                                           | 1                                            | [3]                                |
| O43306                   | ADCY6     | Adenylate cyclase type 6                                                    | -                          | +                           | 0                                           | 12                                           | [2], [8]                           |
| P51828                   | ADCY7     | Adenylate cyclase type 7                                                    | +                          | +                           | 4                                           | 12                                           | -                                  |
| Q99943                   | AGPAT1    | 1-acyl-sn-glycerol-3-phosphate acyltransferase alpha                        | +                          | -                           | 0                                           | 3                                            | [1], [3], [8]                      |
| Q9NUQ2                   | AGPAT5    | 1-acyl-sn-glycerol-3-phosphate acyltransferase epsilon                      | -                          | +                           | 1                                           | 3                                            | -                                  |
| P43353                   | ALDH3B1   | Aldehyde dehydrogenase family 3 member B1                                   | -                          | +                           | 2                                           | 0                                            | [3]                                |
| Q02252                   | ALDH6A1   | Methylmalonate-semialdehyde dehydrogenase [acylating], mitochondrial        | +                          | +                           | 1                                           | 1                                            | -                                  |
| Q86YT9                   | AMICA1    | Junctional adhesion molecule-like                                           | -                          | +                           | 2                                           | 1                                            | -                                  |
| Q9H6X2                   | ANTXR1    | Anthrax toxin receptor 1                                                    | +                          | -                           | 4                                           | 1                                            | [1]                                |
| P58335                   | ANTXR2    | Anthrax toxin receptor 2                                                    | -                          | +                           | 5                                           | 1                                            | [5]                                |
| Q63HQ0                   | AP1AR     | AP-1 complex-associated regulatory protein                                  | +                          | +                           | 3                                           | 0                                            | [1]                                |
| Q9NXU5                   | ARL15     | ADP-ribosylation factor-like protein 15                                     | +                          | +                           | 0                                           | 0                                            | [1], [2], [3], [8]                 |
| Q8N655                   | ARL6IP6   | ADP-ribosylation factor-like protein 6-interacting protein 6                | +                          | +                           | 1                                           | 3                                            | [1]                                |
| P98196                   | ATP11A    | Probable phospholipid-transporting ATPase 1H                                | -                          | +                           | 3                                           | 7                                            | [4]                                |
| Q9Y2G3                   | ATP11B    | Probable phospholipid-transporting ATPase 1F                                | +                          | +                           | 4                                           | 8                                            | [1], [2]                           |
| Q8NB49                   | ATP11C    | Probable phospholipid-transporting ATPase 1G                                | -                          | +                           | 0                                           | 7                                            | -                                  |
| Q9Y487                   | ATP6VOA2  | V-type proton ATPase 116 kDa subunit a isoform 2                            | +                          | -                           | 1                                           | 6                                            | [1], [2]                           |
| O43861                   | ATP9B     | Probable phospholipid-transporting ATPase 1IB                               | +                          | -                           | 1                                           | 0                                            | [1]                                |
| O75882                   | ATRNL     | Attractin                                                                   | +                          | -                           | 4                                           | 1                                            | [8]                                |
| Q9Y679                   | AUP1      | Ancient ubiquitous protein 1                                                | +                          | +                           | 1                                           | 2                                            | [1]                                |
| Q9Y679-3                 | AUP1      | Ancient ubiquitous protein 1 (Isoform 3)                                    | +                          | -                           | 1                                           | 0                                            | -                                  |
| O43505                   | B3GNT1    | N-acetyllactosaminide beta-1,3-N-acetylglucosaminyltransferase              | -                          | +                           | 1                                           | 1                                            | [1]                                |
| P15291                   | B4GALT1   | Beta-1,4-galactosyltransferase 1                                            | +                          | +                           | 1                                           | 1                                            | [1]                                |
| Q9UBV7                   | B4GALT7   | Beta-1,4-galactosyltransferase 7                                            | +                          | +                           | 1                                           | 1                                            | -                                  |
| Q9HB09                   | BCL2L12   | Bcl-2-like protein 12                                                       | +                          | -                           | 0                                           | 0                                            | -                                  |
| O15155                   | BET1      | BET1 homolog                                                                | -                          | +                           | 0                                           | 1                                            | [2]                                |
| Q9NYM9                   | BET1L     | BET1-like protein                                                           | +                          | -                           | 0                                           | 1                                            | [2]                                |
| Q10589                   | BST2      | Bone marrow stromal antigen 2                                               | +                          | +                           | 2                                           | 1                                            | -                                  |
| Q8N357                   | C2orf18   | Solute carrier family 35 member F6                                          | -                          | +                           | 0                                           | 10                                           | -                                  |
| Q6P1X6                   | C8orf82   | UPF0598 protein C8orf82                                                     | +                          | -                           | 1                                           | 0                                            | [2]                                |
| Q9HA72                   | CALHM2    | Calcium homeostasis modulator protein 2                                     | -                          | +                           | 1                                           | 4                                            | -                                  |
| P27824                   | CANX      | Calnexin                                                                    | +                          | +                           | 2                                           | 1                                            | [1], [3], [5], [7], [8]            |
| O15484                   | CAPN5     | Calpain-5                                                                   | -                          | +                           | 1                                           | 0                                            | [4], [5], [8]                      |
| A6N179                   | CCDC69    | Coiled-coil domain-containing protein 69                                    | -                          | +                           | 1                                           | 0                                            | -                                  |
| Q8ND76                   | CCNY      | Cyclin-Y                                                                    | +                          | +                           | 2                                           | 0                                            | [1], [2], [3]                      |
| Q8ND76-3                 | CCNY      | Cyclin-Y                                                                    | +                          | -                           | 0                                           | 0                                            | -                                  |
| Q8N7R7                   | CCNYL1    | Cyclin-Y-like protein 1                                                     | +                          | -                           | 2                                           | 0                                            | [1]                                |
| P51681                   | CCR5      | C-C chemokine receptor type 5                                               | -                          | +                           | 4                                           | 6                                            | -                                  |
| P48509                   | CD151     | CD151 antigen                                                               | -                          | +                           | 7                                           | 4                                            | [2], [6]                           |
| P29017                   | CD1C      | T-cell surface glycoprotein CD1c                                            | +                          | -                           | 1                                           | 1                                            | -                                  |
| Q8TD46                   | CD200R1   | Cell surface glycoprotein CD200 receptor 1                                  | -                          | +                           | 1                                           | 2                                            | -                                  |
| P26842                   | CD27      | CD27 antigen                                                                | -                          | +                           | 1                                           | 1                                            | -                                  |
| P16671                   | CD36      | Platelet glycoprotein 4 (Fragment)                                          | -                          | +                           | 4                                           | 2                                            | [2], [3]                           |
| P11049                   | CD37      | Leukocyte antigen CD37                                                      | -                          | +                           | 4                                           | 4                                            | -                                  |
| P28907                   | CD38      | ADP-ribosyl cyclase 1                                                       | +                          | +                           | 2                                           | 1                                            | -                                  |
| P04234                   | CD3D      | T-cell surface glycoprotein CD3 delta chain                                 | +                          | +                           | 0                                           | 0                                            | [1], [2], [4], [8]                 |
| P01730                   | CD4       | T-cell surface glycoprotein CD4                                             | -                          | +                           | 3                                           | 1                                            | [1]                                |
| P16070                   | CD44      | CD44 antigen (Fragment)                                                     | -                          | +                           | 2                                           | 1                                            | [3], [5]                           |
| P06127                   | CD5       | T-cell surface glycoprotein CD5                                             | +                          | -                           | 2                                           | 1                                            | [1]                                |
| P19397                   | CD53      | Leukocyte surface antigen CD53                                              | +                          | +                           | 4                                           | 4                                            | -                                  |
| P08962                   | CD63      | CD63 antigen                                                                | +                          | +                           | 7                                           | 4                                            | [2], [5]                           |
| P09564                   | CD7       | T-cell antigen CD7                                                          | +                          | +                           | 2                                           | 1                                            | -                                  |
| P21854                   | CD72      | B-cell differentiation antigen CD72                                         | -                          | +                           | 2                                           | 1                                            | -                                  |
| P27701                   | CD82      | CD82 antigen                                                                | +                          | +                           | 5                                           | 4                                            | [1], [2], [5], [7]                 |
| Q01151                   | CD83      | CD83 antigen                                                                | -                          | +                           | 0                                           | 1                                            | -                                  |
| P21926                   | CD9       | CD9 antigen                                                                 | -                          | +                           | 6                                           | 4                                            | [5]                                |
| P40200                   | CD96      | T-cell surface protein tactile                                              | -                          | +                           | 1                                           | 1                                            | -                                  |
| P48960-2                 | CD97      | CD97 antigen (Isoform 2)                                                    | +                          | -                           | 0                                           | 7                                            | -                                  |
| P48960                   | CD97      | CD97 antigen                                                                | -                          | +                           | 0                                           | 7                                            | [4]                                |
| P14209                   | CD99      | CD99 antigen                                                                | +                          | +                           | 0                                           | 2                                            | [5], [6]                           |
| Q8TC22                   | CD99L2    | CD99 antigen-like protein 2                                                 | -                          | +                           | 1                                           | 1                                            | [2], [8]                           |
| Q5VV42                   | CDKAL1    | Threonylcarbamoyladenosine tRNA methyltransferase                           | -                          | +                           | 1                                           | 1                                            | -                                  |
| Q9NPF2                   | CHST11    | Carbohydrate sulfotransferase 11                                            | +                          | -                           | 1                                           | 1                                            | [1]                                |
| Q07065                   | CKAP4     | Cytoskeleton-associated protein 4                                           | +                          | +                           | 1                                           | 1                                            | [3], [4], [5]                      |
| Q9NY35                   | CLDN1     | Claudin domain-containing protein 1                                         | -                          | +                           | 2                                           | 4                                            | -                                  |
| O14967                   | CLGN      | Calmegin                                                                    | +                          | -                           | 1                                           | 1                                            | [1]                                |
| Q96DZ5                   | CLIP3     | CAP-Gly domain-containing linker protein 3                                  | +                          | -                           | 2                                           | 0                                            | [8]                                |
| Q6PIW8                   | CNST      | Consortin                                                                   | -                          | +                           | 2                                           | 1                                            | -                                  |
| Q86VU5                   | COMTD1    | Catechol O-methyltransferase domain-containing protein 1 (Fragment)         | -                          | +                           | 0                                           | 1                                            | [2]                                |
| Q9UI42                   | CPA4      | Carboxypeptidase A4                                                         | +                          | -                           | 0                                           | 0                                            | -                                  |
| Q9HCP0                   | CSNK1G1   | Casein kinase I isoform gamma-1                                             | +                          | +                           | 3                                           | 0                                            | [1], [2], [8]                      |
| P78368                   | CSNK1G2   | Casein kinase I isoform gamma-2                                             | +                          | +                           | 3                                           | 0                                            | [8]                                |
| Q9Y6M4-3                 | CSNK1G3   | Casein kinase I isoform gamma-3 (Isoform 3)                                 | +                          | -                           | 3                                           | 0                                            | -                                  |
| Q9Y6M4                   | CSNK1G3   | Casein kinase I isoform gamma-3                                             | -                          | +                           | 3                                           | 0                                            | [1], [2], [8]                      |
| Q9GZU7-2                 | CTDSP1    | Carboxy-terminal domain RNA polymerase II polypeptide A small phosphatase 1 | +                          | -                           | 0                                           | 0                                            | -                                  |
| Q9GZU7                   | CTDSP1    | Carboxy-terminal domain RNA polymerase II polypeptide A small phosphatase 1 | -                          | +                           | 0                                           | 0                                            | [1]                                |
| O14595                   | CTDSP2    | Carboxy-terminal domain RNA polymerase II polypeptide A small phosphatase 2 | -                          | +                           | 0                                           | 0                                            | -                                  |
| P78310-2                 | CXADR     | Coxsackievirus and adenovirus receptor (Isoform 2)                          | +                          | -                           | 2                                           | 1                                            | -                                  |
| P04839                   | CYBB      | Cytochrome b-245 heavy chain                                                | -                          | +                           | 2                                           | 4                                            | [3]                                |
| Q9Y4D1                   | DAAM1     | Disheveled-associated activator of morphogenesis 1                          | +                          | +                           | 1                                           | 0                                            | [1], [2], [8]                      |
| Q8NCG7                   | DAGLB     | Sn1-specific diacylglycerol lipase beta                                     | +                          | +                           | 3                                           | 4                                            | [1], [2], [3]                      |
| Q8IWE4                   | DCUN1D3   | DCN1-like protein 3                                                         | +                          | -                           | 2                                           | 0                                            | -                                  |
| Q9BSY9                   | DESI2     | Desumoylating isopeptidase 2                                                | +                          | +                           | 0                                           | 0                                            | -                                  |

| UniProt Accession Number | Gene Name | Protein                                                                  | Enriched in Jurkat T cells | Enriched in Primary T cells | Predicted Palmitoylation Sites <sup>a</sup> | Predicted Transmembrane Helices <sup>b</sup> | Literature References <sup>c</sup> |
|--------------------------|-----------|--------------------------------------------------------------------------|----------------------------|-----------------------------|---------------------------------------------|----------------------------------------------|------------------------------------|
| Q9P202                   | DFNB31    | Whirlin                                                                  | -                          | +                           | 0                                           | 0                                            | -                                  |
| P52429                   | DGKE      | Diacylglycerol kinase epsilon                                            | -                          | +                           | 2                                           | 1                                            | -                                  |
| Q9Y2H0                   | DLGAP4    | Disks large-associated protein 4                                         | +                          | -                           | 2                                           | 0                                            | [2]                                |
| O75190-3                 | DNAJB6    | DnaJ homolog subfamily B member 6                                        | -                          | +                           | 0                                           | 0                                            | -                                  |
| Q9H3Z4                   | DNAJC5    | DnaJ homolog subfamily C member 5                                        | +                          | +                           | 13                                          | 1                                            | [1], [2], [3]                      |
| Q14126                   | DSG2      | Desmoglein-2                                                             | +                          | -                           | 1                                           | 2                                            | [1]                                |
| O00559                   | EBAG9     | Receptor-binding cancer antigen expressed on SISO cells                  | +                          | -                           | 1                                           | 0                                            | [1], [2], [8]                      |
| P42892-3                 | ECE1      | Endothelin-converting enzyme 1                                           | +                          | -                           | 0                                           | 1                                            | -                                  |
| P42892                   | ECE1      | Endothelin-converting enzyme 1                                           | +                          | +                           | 0                                           | 1                                            | [2], [5]                           |
| O75071                   | EFCAB14   | EF-hand calcium-binding domain-containing protein 14                     | +                          | -                           | 2                                           | 1                                            | [1]                                |
| Q14156                   | EFR3A     | Protein EFR3 homolog A                                                   | -                          | +                           | 4                                           | 0                                            | [2], [3]                           |
| Q7L2H7                   | EIF3M     | Eukaryotic translation initiation factor 3 subunit M                     | -                          | +                           | 2                                           | 0                                            | -                                  |
| Q9NYP7                   | ELOVL5    | Elongation of very long chain fatty acids protein 5                      | -                          | +                           | 1                                           | 7                                            | -                                  |
| Q6PCB8                   | EMB       | Embigin                                                                  | +                          | -                           | 0                                           | 1                                            | -                                  |
| P54852                   | EMP3      | Epithelial membrane protein 3 (Fragment)                                 | -                          | +                           | 1                                           | 4                                            | -                                  |
| Q9Y227                   | ENTPD4    | Ectonucleoside triphosphate diphosphohydrolase 4                         | -                          | +                           | 0                                           | 2                                            | -                                  |
| Q96RT1-7                 | ERBB2IP   | Protein LAP2 (Isoform 7)                                                 | +                          | -                           | 3                                           | 0                                            | -                                  |
| Q96RT1                   | ERBB2IP   | Protein LAP2                                                             | -                          | +                           | 3                                           | 0                                            | [1], [2]                           |
| Q969X5                   | ERGIC1    | Endoplasmic reticulum-Golgi intermediate compartment protein 1           | +                          | +                           | 1                                           | 2                                            | [3]                                |
| Q969Q1                   | ERGIC2    | Endoplasmic reticulum-Golgi intermediate compartment protein 2           | -                          | +                           | 0                                           | 0                                            | [1]                                |
| Q9Y282                   | ERGIC3    | Endoplasmic reticulum-Golgi intermediate compartment protein 3           | +                          | +                           | 0                                           | 2                                            | [1], [2], [3], [5], [8]            |
| P34910                   | EVI2B     | Protein EVI2B                                                            | -                          | +                           | 1                                           | 1                                            | -                                  |
| Q92817                   | EVPL      | Envoplakin                                                               | -                          | +                           | 2                                           | 0                                            | -                                  |
| P05413                   | FABP3     | Fatty acid-binding protein, heart                                        | +                          | -                           | 1                                           | 0                                            | -                                  |
| A8MVW0                   | FAM171A2  | Protein FAM171A2                                                         | +                          | -                           | 2                                           | 2                                            | -                                  |
| Q8N128                   | FAM177A1  | Protein FAM177A1                                                         | -                          | +                           | 0                                           | 0                                            | -                                  |
| Q9NUQ9                   | FAM49B    | Protein FAM49B                                                           | +                          | +                           | 0                                           | 0                                            | [1], [2]                           |
| P25445                   | FAS       | Tumor necrosis factor receptor superfamily member 6                      | +                          | +                           | 2                                           | 0                                            | -                                  |
| Q9Y311                   | FBXO7     | F-box only protein 7                                                     | -                          | +                           | 0                                           | 0                                            | -                                  |
| P02671                   | FGA       | Fibrinogen alpha chain                                                   | +                          | -                           | 1                                           | 0                                            | -                                  |
| P02675                   | FGB       | Fibrinogen beta chain                                                    | +                          | -                           | 0                                           | 0                                            | -                                  |
| P09769                   | FGR       | Tyrosine-protein kinase Fgr                                              | -                          | +                           | 2                                           | 0                                            | -                                  |
| O75955                   | FLOT1     | Flotillin-1                                                              | +                          | +                           | 1                                           | 0                                            | [1], [2], [3], [4], [5]            |
| Q14254                   | FLOT2     | Flotillin-2                                                              | +                          | +                           | 3                                           | 0                                            | [1], [2], [3], [5]                 |
| Q9Y2H6                   | FNDC3A    | Fibronectin type-III domain-containing protein 3A                        | -                          | +                           | 1                                           | 1                                            | [8]                                |
| P06241-3                 | FYN       | Tyrosine-protein kinase Fyn (Isoform 3)                                  | +                          | -                           | 2                                           | 0                                            | -                                  |
| P06241                   | FYN       | Tyrosine-protein kinase Fyn                                              | -                          | +                           | 4                                           | 0                                            | [1], [2], [3], [5]                 |
| Q10472                   | GALNT1    | Polypeptide N-acetylgalactosaminyltransferase 1                          | +                          | +                           | 1                                           | 1                                            | -                                  |
| Q8IKK2                   | GALNT12   | Polypeptide N-acetylgalactosaminyltransferase 12                         | +                          | -                           | 1                                           | 1                                            | [1]                                |
| Q9NY12                   | GAR1      | H/ACA ribonucleoprotein complex subunit 1                                | +                          | -                           | 0                                           | 0                                            | -                                  |
| Q9UG22                   | GIMAP2    | GTPase IMAP family member 2                                              | -                          | +                           | 3                                           | 2                                            | -                                  |
| P29992                   | GNA11     | Guanine nucleotide-binding protein subunit alpha-11                      | -                          | +                           | 2                                           | 0                                            | [1], [2], [4], [5], [6]            |
| Q03113                   | GNA12     | Guanine nucleotide-binding protein subunit alpha-12                      | -                          | +                           | 0                                           | 0                                            | [4]                                |
| Q14344                   | GNA13     | Guanine nucleotide-binding protein subunit alpha-13                      | +                          | +                           | 2                                           | 0                                            | [1], [2], [4], [5]                 |
| P30679                   | GNA15     | Guanine nucleotide-binding protein subunit alpha-15                      | +                          | -                           | 3                                           | 0                                            | [1], [2]                           |
| P09471-2                 | GNAO1     | Isoform Alpha-2 of Guanine nucleotide-binding protein G(o) subunit alpha | -                          | +                           | 1                                           | 0                                            | -                                  |
| P50148                   | GNAQ      | Guanine nucleotide-binding protein G(q) subunit alpha                    | +                          | +                           | 2                                           | 0                                            | [1], [2], [3], [4], [5]            |
| P63092                   | GNAS      | Guanine nucleotide-binding protein G(s) subunit alpha isoforms short     | -                          | +                           | 1                                           | 0                                            | [6]                                |
| P19086                   | GNAZ      | Guanine nucleotide-binding protein G(z) subunit alpha                    | -                          | +                           | 2                                           | 0                                            | -                                  |
| Q7Z5G4                   | GOLGA7    | Golgin subfamily A member 7                                              | +                          | +                           | 0                                           | 0                                            | [1], [2], [3]                      |
| Q2TAP0                   | GOLGA7B   | Golgin subfamily A member 7B                                             | -                          | +                           | 0                                           | 0                                            | -                                  |
| Q14789                   | GOLGB1    | Golgin subfamily B member 1                                              | +                          | +                           | 2                                           | 1                                            | [1]                                |
| Q99795                   | GPA33     | Cell surface A33 antigen                                                 | -                          | +                           | 6                                           | 1                                            | -                                  |
| Q9NPR9                   | GPR108    | Protein GPR108                                                           | -                          | +                           | 0                                           | 7                                            | -                                  |
| P32249                   | GPR183    | G-protein coupled receptor 183                                           | -                          | +                           | 0                                           | 7                                            | -                                  |
| Q15743                   | GPR68     | Ovarian cancer G-protein coupled receptor 1                              | -                          | +                           | 1                                           | 7                                            | -                                  |
| Q6ZVF9                   | GPRIN3    | G protein-regulated inducer of neurite outgrowth 3                       | -                          | +                           | 1                                           | 0                                            | [8]                                |
| P07203                   | GPX1      | Glutathione peroxidase 1                                                 | +                          | -                           | 2                                           | 0                                            | [8]                                |
| Q8WW33                   | GTSF1     | Gametocyte-specific factor 1                                             | +                          | -                           | 0                                           | 0                                            | -                                  |
| Q9BSH5                   | HDHD3     | Haloacid dehalogenase-like hydrolase domain-containing protein 3         | -                          | +                           | 1                                           | 0                                            | -                                  |
| O75146                   | HIP1R     | Huntingtin-interacting protein 1-related protein                         | -                          | +                           | 1                                           | 0                                            | -                                  |
| P01889                   | HLA-B     | HLA class I histocompatibility antigen, B-7 alpha chain                  | +                          | +                           | 2                                           | 1                                            | [1], [4]                           |
| P30504                   | HLA-C     | HLA class I histocompatibility antigen, Cw-4 alpha chain                 | +                          | +                           | 2                                           | 1                                            | -                                  |
| P30501                   | HLA-C     | HLA class I histocompatibility antigen, Cw-2 alpha chain                 | -                          | +                           | 1                                           | 1                                            | -                                  |
| P00738                   | HP        | Haptoglobin                                                              | +                          | -                           | 0                                           | 0                                            | -                                  |
| P01112                   | HRAS      | GTPase HRas                                                              | +                          | -                           | 3                                           | 0                                            | [1], [2], [5], [6]                 |
| P13598                   | ICAM2     | Intercellular adhesion molecule 2                                        | +                          | +                           | 2                                           | 1                                            | [5]                                |
| Q01629                   | IFITM2    | Interferon-induced transmembrane protein 1                               | +                          | -                           | 3                                           | 2                                            | [3], [5]                           |
| Q01628                   | IFITM3    | Interferon-induced transmembrane protein 3                               | -                          | +                           | 3                                           | 2                                            | [2], [3], [5]                      |
| P17181                   | IFNAR1    | Interferon alpha/beta receptor 1                                         | +                          | +                           | 1                                           | 2                                            | -                                  |
| P11717                   | IGF2R     | Cation-independent mannose-6-phosphate receptor                          | +                          | -                           | 3                                           | 1                                            | [1], [3], [7], [8]                 |
| Q969P0                   | IGSF8     | Immunoglobulin superfamily member 8                                      | +                          | +                           | 2                                           | 1                                            | [1], [8]                           |
| P24001-4                 | IL32      | Interleukin-32 (Isoform 4)                                               | +                          | -                           | 1                                           | 0                                            | -                                  |
| Q71H61                   | ILDR2     | Immunoglobulin-like domain-containing receptor 2                         | +                          | -                           | 12                                          | 1                                            | -                                  |
| Q9H0X4                   | ITFG3     | Protein ITFG3                                                            | +                          | +                           | 2                                           | 1                                            | -                                  |
| P23229-4                 | ITGA6     | Integrin alpha-6 (Isoform 4)                                             | +                          | -                           | 2                                           | 1                                            | -                                  |
| P23229                   | ITGA6     | Integrin alpha-6                                                         | -                          | +                           | 1                                           | 1                                            | [5]                                |
| Q43736                   | ITM2A     | Integral membrane protein 2A                                             | +                          | +                           | 1                                           | 1                                            | [1]                                |
| Q9Y287                   | ITM2B     | Integral membrane protein 2B                                             | +                          | -                           | 1                                           | 1                                            | -                                  |
| Q9NQX7                   | ITM2C     | Integral membrane protein 2C                                             | +                          | -                           | 2                                           | 1                                            | [8]                                |
| P23458                   | JAK1      | Tyrosine-protein kinase JAK1                                             | -                          | +                           | 3                                           | 0                                            | -                                  |
| Q9BX67                   | JAM3      | Junctional adhesion molecule C                                           | +                          | +                           | 3                                           | 1                                            | [2], [8]                           |
| Q9Y4C1                   | KDM3A     | Lysine-specific demethylase 3A                                           | -                          | +                           | 0                                           | 0                                            | -                                  |
| Q8IZA0                   | KIAA0319L | Dyslexia-associated protein KIAA0319-like protein                        | +                          | +                           | 4                                           | 1                                            | -                                  |
| A2VDJ0                   | KIAA0922  | Transmembrane protein 131-like                                           | +                          | -                           | 3                                           | 0                                            | -                                  |
| Q9BY89                   | KIAA1671  | Uncharacterized protein KIAA1671                                         | -                          | +                           | 0                                           | 0                                            | -                                  |
| Q8IYS2                   | KIAA2013  | Uncharacterized protein KIAA2013                                         | +                          | +                           | 0                                           | 2                                            | [1], [2], [3]                      |
| P43630                   | KIR3DL2   | Killer cell immunoglobulin-like receptor 3DL2                            | +                          | -                           | 1                                           | 1                                            | -                                  |
| Q6UWL6-3                 | KIRREL2   | Kin of IRRE-like protein 2 (Isoform 3)                                   | +                          | -                           | 2                                           | 1                                            | -                                  |
| Q8NBE8                   | KLHL23    | Keich-like protein 23                                                    | -                          | +                           | 0                                           | 0                                            | -                                  |
| Q6GTX8                   | LAIR1     | Leukocyte-associated immunoglobulin-like receptor 1                      | +                          | -                           | 1                                           | 1                                            | -                                  |
| Q6IAA8                   | LAMTOR1   | Regulator complex protein LAMTOR1                                        | +                          | -                           | 2                                           | 0                                            | [1], [5], [7]                      |
| O43561                   | LAT       | Linker for activation of T-cells family member 1                         | +                          | +                           | 3                                           | 1                                            | [1], [2], [3]                      |
| P06239                   | LCK       | Tyrosine-protein kinase Lck                                              | +                          | +                           | 2                                           | 0                                            | [1], [5]                           |
| Q9H400                   | LIME1     | Lck-interacting transmembrane adapter 1                                  | +                          | +                           | 3                                           | 1                                            | -                                  |
| Q9BU23                   | LMF2      | Lipase maturation factor 2                                               | -                          | +                           | 0                                           | 7                                            | -                                  |
| Q8IWU2                   | LMTK2     | Serine/threonine-protein kinase LMTK2                                    | +                          | +                           | 2                                           | 3                                            | -                                  |
| Q9UIQ6-3                 | LNPEP     | Leucyl-cystinyl aminopeptidase (Isoform 3)                               | +                          | -                           | 0                                           | 1                                            | -                                  |
| Q9UIQ6                   | LNPEP     | Leucyl-cystinyl aminopeptidase                                           | -                          | +                           | 0                                           | 1                                            | [1], [2], [3]                      |
| Q9Y561                   | LRP12     | Low-density lipoprotein receptor-related protein 12                      | +                          | -                           | 3                                           | 1                                            | -                                  |
| Q9BTT6                   | LRRC1     | Leucine-rich repeat-containing protein 1                                 | +                          | -                           | 2                                           | 0                                            | [1]                                |
| A6NHZ5                   | LRRC14B   | Leucine-rich repeat-containing protein 14B                               | -                          | +                           | 0                                           | 0                                            | -                                  |

| UniProt Accession Number | Gene Name | Protein                                                                  | Enriched in Jurkat T cells | Enriched in Primary T cells | Predicted Palmitoylation Sites <sup>a</sup> | Predicted Transmembrane Helices <sup>b</sup> | Literature References <sup>c</sup> |
|--------------------------|-----------|--------------------------------------------------------------------------|----------------------------|-----------------------------|---------------------------------------------|----------------------------------------------|------------------------------------|
| Q8N386                   | LRRCC25   | Leucine-rich repeat-containing protein 25                                | -                          | +                           | 0                                           | 1                                            | -                                  |
| Q86X29                   | LSR       | Lipolysis-stimulated lipoprotein receptor                                | -                          | +                           | 12                                          | 1                                            | -                                  |
| Q9HBG7                   | LY9       | T-lymphocyte surface antigen Ly-9 (Fragment)                             | -                          | +                           | 3                                           | 1                                            | [3]                                |
| P20645                   | M6PR      | Cation-dependent mannose-6-phosphate receptor                            | +                          | +                           | 2                                           | 1                                            | [2], [4]                           |
| Q9UKM7                   | MAN1B1    | Endoplasmic reticulum mannosyl-oligosaccharide 1,2-alpha-mannosidase     | +                          | -                           | 1                                           | 1                                            | -                                  |
| Q68D91                   | MBLAC2    | Metallo-beta-lactamase domain-containing protein 2                       | +                          | +                           | 0                                           | 0                                            | [2], [6]                           |
| Q9GZU1                   | MCOLN1    | Mucolin-1                                                                | +                          | -                           | 7                                           | 5                                            | -                                  |
| Q9P1T7                   | MDFIC     | MyoD family inhibitor domain-containing protein                          | -                          | +                           | 11                                          | 0                                            | -                                  |
| Q9NU22                   | MDN1      | Midasin                                                                  | -                          | +                           | 4                                           | 0                                            | [1]                                |
| Q6Z5S7                   | MFSD6     | Major facilitator superfamily domain-containing protein 6                | -                          | +                           | 0                                           | 11                                           | [2]                                |
| Q29980                   | MICB      | MHC class I polypeptide-related sequence B                               | +                          | -                           | 0                                           | 0                                            | -                                  |
| Q14165                   | MLEC      | Malectin                                                                 | -                          | +                           | 2                                           | 1                                            | [1], [2], [3]                      |
| Q8IVH4                   | MMAA      | Methylmalonic aciduria type A protein, mitochondrial                     | +                          | -                           | 0                                           | 0                                            | -                                  |
| Q9BRT2                   | MNF1      | Mitochondrial nucleoid factor 1                                          | +                          | +                           | 0                                           | 0                                            | [4], [5]                           |
| P05164                   | MPO       | Myeloperoxidase                                                          | +                          | -                           | 0                                           | 0                                            | -                                  |
| Q9NZW5                   | MPP6      | MAGUK p55 subfamily member 6                                             | -                          | +                           | 0                                           | 0                                            | [1], [4], [6]                      |
| Q8N565                   | MREG      | Melanoregulin                                                            | +                          | +                           | 6                                           | 0                                            | [1]                                |
| P11836                   | MS4A1     | B-lymphocyte antigen CD20                                                | -                          | +                           | 1                                           | 4                                            | -                                  |
| Q9Y3D2                   | MSRB2     | Methionine-R-sulfoxide reductase B2, mitochondrial                       | +                          | -                           | 0                                           | 0                                            | -                                  |
| P03915                   | MT-ND5    | NADH-ubiquinone oxidoreductase chain 5                                   | -                          | +                           | 0                                           | 15                                           | -                                  |
| Q86UE4                   | MTDH      | Protein LYRIC                                                            | +                          | +                           | 1                                           | 1                                            | [1], [2], [3], [5], [8]            |
| Q13614                   | MTMR2     | Myotubularin-related protein 2                                           | -                          | +                           | 1                                           | 0                                            | -                                  |
| Q75570                   | MTRF1     | Peptide chain release factor 1, mitochondrial                            | +                          | -                           | 1                                           | 0                                            | -                                  |
| Q96S97                   | MYADM     | Myeloid-associated differentiation marker                                | +                          | +                           | 0                                           | 8                                            | [1]                                |
| Q9NZM1                   | MYOF      | Myoferlin                                                                | -                          | +                           | 0                                           | 1                                            | [3], [4], [5]                      |
| P18440                   | NAT1      | Arylamine N-acetyltransferase 1                                          | -                          | -                           | 0                                           | 0                                            | -                                  |
| Q6PIU2                   | NCEH1     | Neutral cholesterol ester hydrolase 1                                    | -                          | +                           | 1                                           | 1                                            | [1]                                |
| Q92542                   | NCSTN     | Nicastrin                                                                | +                          | +                           | 1                                           | 1                                            | -                                  |
| Q14561                   | NDUFAB1   | Acyl carrier protein                                                     | +                          | -                           | 0                                           | 0                                            | -                                  |
| Q00653                   | NFKB2     | Nuclear factor NF-kappa-B p100 subunit                                   | -                          | +                           | 1                                           | 0                                            | -                                  |
| O15118                   | NPC1      | Niemann-Pick C1 protein                                                  | +                          | +                           | 1                                           | 12                                           | [3]                                |
| P01111                   | NRAS      | GTPase NRas                                                              | +                          | +                           | 2                                           | 0                                            | [2], [3], [5]                      |
| Q96D31                   | ORAI1     | Calcium release-activated calcium channel protein 1                      | -                          | +                           | 0                                           | 3                                            | [2]                                |
| Q9NWU1                   | OXSM      | 3-oxoacyl-[acyl-carrier-protein] synthase, mitochondrial                 | +                          | +                           | 2                                           | 0                                            | [2], [4], [5]                      |
| Q99572                   | P2RX7     | P2X purinoceptor 7                                                       | -                          | +                           | 5                                           | 1                                            | [8]                                |
| Q9UKS6                   | PACSN3    | Protein kinase C and casein kinase substrate in neurons protein 3        | +                          | -                           | 2                                           | 0                                            | -                                  |
| Q9NWQ8                   | PAG1      | Phosphoprotein associated with glycosphingolipid-enriched microdomains 1 | +                          | +                           | 2                                           | 1                                            | -                                  |
| Q9H6A9                   | PCNXL3    | Pecanex-like protein 3                                                   | -                          | +                           | 1                                           | 11                                           | -                                  |
| O00330                   | PDHX      | Pyruvate dehydrogenase protein X component, mitochondrial                | +                          | +                           | 0                                           | 0                                            | -                                  |
| P16284                   | PECAM1    | Platelet endothelial cell adhesion molecule                              | +                          | +                           | 1                                           | 1                                            | [5]                                |
| Q9UFP1                   | PHF8      | Histone lysine demethylase PHF8                                          | -                          | +                           | 1                                           | 0                                            | -                                  |
| Q9BTU6                   | PI4K2A    | Phosphatidylinositol 4-kinase type 2-alpha                               | +                          | +                           | 3                                           | 0                                            | [1], [2], [3], [5]                 |
| Q8TCG2                   | PI4K2B    | Phosphatidylinositol 4-kinase type 2-beta                                | +                          | +                           | 4                                           | 0                                            | [1], [2]                           |
| Q99569                   | PKP4      | Plakophilin-4                                                            | +                          | -                           | 0                                           | 0                                            | [8]                                |
| O15162                   | PLSCR1    | Phospholipid scramblase 1                                                | +                          | +                           | 7                                           | 0                                            | [2], [3], [4]                      |
| Q9NRY6                   | PLSCR3    | Phospholipid scramblase 3                                                | +                          | +                           | 7                                           | 0                                            | [2], [3], [4], [5]                 |
| O15031                   | PLXNB2    | Plexin-B2                                                                | -                          | +                           | 1                                           | 0                                            | [8]                                |
| O00592                   | PODXL     | Podocalyxin                                                              | +                          | -                           | 3                                           | 1                                            | [5]                                |
| A8CG34                   | POM121C   | Nuclear envelope pore membrane protein POM 121C                          | +                          | +                           | 0                                           | 1                                            | -                                  |
| Q96T49                   | PPP1R16B  | Protein phosphatase 1 regulatory inhibitor subunit 16B                   | -                          | +                           | 2                                           | 0                                            | -                                  |
| P55345                   | PRMT2     | Protein arginine N-methyltransferase 2                                   | -                          | +                           | 0                                           | 0                                            | -                                  |
| P49768                   | PSEN1     | Presenilin-1                                                             | +                          | -                           | 0                                           | 9                                            | [1]                                |
| Q9UNM6                   | PSMD13    | 26S proteasome non-ATPase regulatory subunit 13                          | -                          | +                           | 0                                           | 0                                            | [1]                                |
| Q92530                   | PSMF1     | Proteasome inhibitor PI31 subunit                                        | -                          | +                           | 0                                           | 0                                            | -                                  |
| O43586                   | PSTPIP1   | Proline-serine-threonine phosphatase-interacting protein 1               | -                          | +                           | 0                                           | 0                                            | -                                  |
| Q13308                   | PTK7      | Inactive tyrosine-protein kinase 7                                       | +                          | -                           | 2                                           | 2                                            | [1]                                |
| Q9P035                   | PTPLAD1   | Very-long-chain (3R)-3-hydroxyacyl-[acyl-carrier protein] dehydratase 3  | -                          | +                           | 0                                           | 5                                            | -                                  |
| P15151-3                 | PVR       | Poliovirus receptor                                                      | +                          | -                           | 0                                           | 0                                            | -                                  |
| P11234                   | RALB      | Ras-related protein Ral-B                                                | +                          | -                           | 2                                           | 0                                            | [5], [8]                           |
| P10114                   | RAP2A     | Ras-related protein Rap-2a                                               | -                          | +                           | 2                                           | 0                                            | [1], [2]                           |
| P61225                   | RAP2B     | Ras-related protein Rap-2b                                               | +                          | +                           | 3                                           | 0                                            | [1], [2], [3], [5]                 |
| Q9Y3L5                   | RAP2C     | Ras-related protein Rap-2c                                               | +                          | +                           | 3                                           | 0                                            | [1], [2], [4], [5]                 |
| Q00765                   | REEP5     | Receptor expression-enhancing protein 5                                  | -                          | +                           | 0                                           | 2                                            | [5], [8]                           |
| Q8IUW5                   | RELL1     | RELT-like protein 1                                                      | +                          | +                           | 1                                           | 2                                            | [6]                                |
| Q8WZ73                   | RFFL      | E3 ubiquitin-protein ligase rififylin                                    | -                          | +                           | 4                                           | 0                                            | -                                  |
| Q14699                   | RFTN1     | Raftlin                                                                  | +                          | +                           | 1                                           | 0                                            | [1], [2]                           |
| P22670                   | RFX1      | MHC class II regulatory factor RFX1                                      | +                          | +                           | 0                                           | 0                                            | [1], [5]                           |
| P49795                   | RGS19     | Regulator of G-protein signaling 19                                      | +                          | -                           | 9                                           | 0                                            | [1], [2]                           |
| Q6NTF9                   | RHBDD2    | Rhomboid domain-containing protein 2                                     | +                          | -                           | 2                                           | 5                                            | [1]                                |
| Q9Y3C5                   | RNF11     | RING finger protein 11                                                   | -                          | +                           | 1                                           | 0                                            | [2]                                |
| O75695                   | RP2       | Protein XRP2                                                             | +                          | -                           | 2                                           | 0                                            | -                                  |
| P10301                   | RRAS      | Ras-related protein R-Ras                                                | +                          | +                           | 2                                           | 0                                            | [1], [2], [3], [5], [8]            |
| P62070                   | RRAS2     | Ras-related protein R-Ras2                                               | +                          | +                           | 2                                           | 0                                            | [5], [8]                           |
| Q96DX4                   | RSPRY1    | RING finger and SPRY domain-containing protein 1                         | +                          | -                           | 3                                           | 0                                            | [1]                                |
| Q9NQC3                   | RTN4      | Reticulon-4                                                              | -                          | +                           | 0                                           | 2                                            | [1], [5]                           |
| O95977                   | S1PR4     | Sphingosine 1-phosphate receptor 4                                       | -                          | +                           | 3                                           | 7                                            | -                                  |
| Q99590                   | SCAF11    | Protein SCAF11                                                           | +                          | -                           | 3                                           | 0                                            | -                                  |
| O15126                   | SCAMP1    | Secretory carrier-associated membrane protein 1                          | -                          | +                           | 0                                           | 4                                            | [1], [2], [3], [8]                 |
| O15127                   | SCAMP2    | Secretory carrier-associated membrane protein 2                          | +                          | +                           | 0                                           | 4                                            | [1], [2], [3], [8]                 |
| O14828                   | SCAMP3    | Secretory carrier-associated membrane protein 3                          | +                          | +                           | 0                                           | 4                                            | [1], [2], [3], [8]                 |
| Q969E2                   | SCAMP4    | Secretory carrier-associated membrane protein 4                          | -                          | +                           | 0                                           | 4                                            | [2]                                |
| Q8WTV0                   | SCARB1    | Scavenger receptor class B member 1                                      | +                          | -                           | 1                                           | 2                                            | [3]                                |
| Q14108                   | SCARB2    | Lysosome membrane protein 2                                              | +                          | +                           | 3                                           | 2                                            | [5], [8]                           |
| Q14160                   | SCRIB     | Protein scribble homolog                                                 | +                          | +                           | 1                                           | 0                                            | [1], [4]                           |
| Q9H190                   | SDCBP2    | Syntenin-2                                                               | -                          | +                           | 0                                           | 0                                            | -                                  |
| Q6IQ49-3                 | SDE2      | Protein SDE2 homolog                                                     | +                          | -                           | 1                                           | 0                                            | -                                  |
| Q92854                   | SEMA4D    | Semaphorin-4D                                                            | +                          | +                           | 2                                           | 2                                            | [1], [2], [8]                      |
| Q9NVA2                   | SEPT11    | Septin-11                                                                | -                          | +                           | 0                                           | 0                                            | -                                  |
| Q9NRX5                   | SERINC1   | Serine incorporator 1                                                    | +                          | +                           | 5                                           | 11                                           | -                                  |
| Q58719                   | SFT2D3    | Vesicle transport protein SFT2C                                          | +                          | -                           | 1                                           | 4                                            | [1], [2], [4]                      |
| Q8NB9J                   | SIDT2     | SID1 transmembrane family member 2                                       | -                          | +                           | 2                                           | 9                                            | [8]                                |
| Q6IA17                   | SIGIRR    | Single Ig IL-1-related receptor                                          | +                          | +                           | 2                                           | 1                                            | -                                  |
| Q8N697                   | SLC15A4   | Solute carrier family 15 member 4                                        | -                          | +                           | 2                                           | 13                                           | -                                  |
| O15427                   | SLC16A3   | Monocarboxylate transporter 4 (Fragment)                                 | -                          | +                           | 1                                           | 12                                           | -                                  |
| P41440                   | SLC19A1   | Folate transporter 1                                                     | +                          | -                           | 0                                           | 11                                           | -                                  |
| Q15758                   | SLC1A5    | Neutral amino acid transporter B(0)                                      | +                          | +                           | 0                                           | 9                                            | [1], [3], [4], [5], [7]            |
| Q6NXT4                   | SLC30A6   | Zinc transporter 6                                                       | -                          | +                           | 3                                           | 6                                            | -                                  |
| Q8TB61-3                 | SLC35B2   | Adenosine 3'-phospho 5'-phosphosulfate transporter 1                     | +                          | -                           | 0                                           | 7                                            | -                                  |
| Q8TB61                   | SLC35B2   | Adenosine 3'-phospho 5'-phosphosulfate transporter 1                     | -                          | +                           | 0                                           | 8                                            | [1], [3], [4]                      |
| Q96K37                   | SLC35E1   | Solute carrier family 35 member E1                                       | -                          | +                           | 0                                           | 6                                            | -                                  |
| POCK96                   | SLC35E2B  | Solute carrier family 35 member E2B                                      | -                          | +                           | 1                                           | 8                                            | -                                  |
| Q96QD8                   | SLC38A2   | Sodium-coupled neutral amino acid transporter 2                          | +                          | -                           | 0                                           | 9                                            | [1], [6]                           |



| UniProt Accession Number | Gene Name | Protein                                                                  | Enriched in Jurkat T cells | Enriched in Primary T cells | Predicted Palmitoylation Sites <sup>a</sup> | Predicted Transmembrane Helices <sup>b</sup> | Literature References <sup>c</sup> |
|--------------------------|-----------|--------------------------------------------------------------------------|----------------------------|-----------------------------|---------------------------------------------|----------------------------------------------|------------------------------------|
| Q9ULF5                   | SLC39A10  | Zinc transporter ZIP10                                                   | +                          | -                           | 2                                           | 7                                            | [8]                                |
| Q96GZ6                   | SLC41A3   | Solute carrier family 41 member 3                                        | -                          | +                           | 0                                           | 10                                           | -                                  |
| Q8NB15                   | SLC43A3   | Solute carrier family 43 member 3                                        | +                          | -                           | 1                                           | 11                                           | [1], [2]                           |
| Q8WWI5                   | SLC44A1   | Choline transporter-like protein 1                                       | +                          | +                           | 9                                           | 9                                            | [2], [3], [8]                      |
| Q8IWA5                   | SLC44A2   | Choline transporter-like protein 2                                       | -                          | +                           | 6                                           | 11                                           | [2], [8]                           |
| P30825                   | SLC7A1    | High affinity cationic amino acid transporter 1                          | +                          | -                           | 2                                           | 14                                           | [1], [4], [8]                      |
| Q92581-3                 | SLC9A6    | Sodium/hydrogen exchanger 6                                              | +                          | -                           | 1                                           | 11                                           | -                                  |
| Q92581-2                 | SLC9A6    | Isoform 2 of Sodium/hydrogen exchanger 6                                 | -                          | +                           | 1                                           | 12                                           | -                                  |
| Q8IVB4                   | SLC9A9    | Sodium/hydrogen exchanger 9                                              | -                          | +                           | 0                                           | 10                                           | [2]                                |
| Q9UIG8                   | SLCO3A1   | Solute carrier organic anion transporter family member 3A1               | -                          | +                           | 2                                           | 12                                           | -                                  |
| B2RUZ4                   | SMIM1     | Small integral membrane protein 1                                        | -                          | +                           | 1                                           | 1                                            | -                                  |
| Q9NYS9                   | SMPD3     | Sphingomyelin phosphodiesterase 3                                        | -                          | +                           | 6                                           | 2                                            | -                                  |
| O00161                   | SNAP23    | Synaptosomal-associated protein 23                                       | +                          | +                           | 6                                           | 0                                            | [1], [2], [3], [4], [5], [6], [7]  |
| P60880-2                 | SNAP25    | Synaptosomal-associated protein 25                                       | +                          | -                           | 4                                           | 0                                            | -                                  |
| Q9YSW9                   | SNX11     | Sorting nexin-11                                                         | +                          | -                           | 2                                           | 0                                            | -                                  |
| Q99523                   | SORT1     | Sortilin                                                                 | +                          | +                           | 1                                           | 1                                            | [1], [2], [8]                      |
| Q8TCT8                   | SPPL2A    | Signal peptide peptidase-like 2A                                         | -                          | +                           | 1                                           | 9                                            | -                                  |
| Q7Z698                   | SPRED2    | Sprouty-related, EVH1 domain-containing protein 2                        | +                          | -                           | 3                                           | 0                                            | [8]                                |
| O43609                   | SPRY1     | Protein sprouty homolog 1                                                | +                          | -                           | 1                                           | 0                                            | -                                  |
| Q5W111                   | SPRYD7    | SPRY domain-containing protein 7                                         | +                          | -                           | 2                                           | 0                                            | [4]                                |
| Q9NUV7                   | SPTLC3    | Serine palmitoyltransferase 3 (Fragment)                                 | -                          | +                           | 0                                           | 0                                            | -                                  |
| Q95772                   | STARD3NL  | MLN64 N-terminal domain homolog                                          | -                          | +                           | 0                                           | 4                                            | [2]                                |
| O75716                   | STK16     | Serine/threonine-protein kinase 16                                       | -                          | +                           | 0                                           | 0                                            | -                                  |
| Q9NZ72                   | STMN3     | Stathmin                                                                 | +                          | -                           | 1                                           | 0                                            | -                                  |
| P27105                   | STOM      | Erythrocyte band 7 integral membrane protein                             | -                          | +                           | 2                                           | 1                                            | [1], [2], [3], [4], [5]            |
| O60499                   | STX10     | Syntaxin-10                                                              | +                          | -                           | 1                                           | 1                                            | [1], [2]                           |
| O75558                   | STX11     | Syntaxin-11                                                              | +                          | +                           | 6                                           | 0                                            | [2], [5]                           |
| Q86Y82                   | STX12     | Syntaxin-12                                                              | +                          | +                           | 1                                           | 1                                            | [1], [2], [3], [5], [8]            |
| P32856-3                 | STX2      | Syntaxin-2                                                               | +                          | -                           | 0                                           | 0                                            | -                                  |
| Q12846                   | STX4      | Syntaxin-4                                                               | +                          | -                           | 1                                           | 1                                            | [1]                                |
| O43752                   | STX6      | Syntaxin-6                                                               | +                          | +                           | 1                                           | 1                                            | [1], [3], [5], [8]                 |
| O15400                   | STX7      | Syntaxin-7                                                               | +                          | +                           | 1                                           | 1                                            | [1], [3], [8]                      |
| Q9UNK0                   | STX8      | Syntaxin-8                                                               | +                          | +                           | 1                                           | 1                                            | [1], [2], [3], [8]                 |
| O15260                   | SURF4     | Surfeit locus protein 4                                                  | -                          | +                           | 0                                           | 5                                            | [1], [8]                           |
| Q96L08                   | SUSD3     | Sushi domain-containing protein 3                                        | -                          | +                           | 2                                           | 1                                            | [2]                                |
| Q8NHG7                   | SVIP      | Small VCP/p97-interacting protein                                        | +                          | -                           | 1                                           | 0                                            | [2], [5]                           |
| Q6ZM23                   | SYNE3     | Nesprin-3                                                                | -                          | +                           | 1                                           | 1                                            | -                                  |
| Q6NXT6                   | TAPT1     | Transmembrane anterior posterior transformation protein 1 homolog        | -                          | +                           | 1                                           | 5                                            | -                                  |
| Q96BS2                   | TESC      | Calcineurin B homologous protein 3                                       | +                          | +                           | 1                                           | 0                                            | -                                  |
| P02787                   | TF        | Serotransferrin                                                          | +                          | -                           | 2                                           | 0                                            | -                                  |
| Q9H5Q4                   | TFB2M     | Dimethyladenosine transferase 2, mitochondrial                           | +                          | -                           | 0                                           | 0                                            | -                                  |
| P02786                   | TFRC      | Transferrin receptor protein 1                                           | -                          | +                           | 0                                           | 1                                            | [1], [2], [5]                      |
| Q8WUY1                   | THEM6     | Protein THEM6                                                            | -                          | +                           | 0                                           | 1                                            | -                                  |
| Q99805                   | TM9SF2    | Transmembrane 9 superfamily member 2                                     | -                          | +                           | 0                                           | 9                                            | [6], [8]                           |
| Q7Z403                   | TMC6      | Transmembrane channel-like protein 6                                     | -                          | +                           | 0                                           | 10                                           | -                                  |
| Q8IU68                   | TMC8      | Transmembrane channel-like protein 8                                     | -                          | +                           | 1                                           | 8                                            | -                                  |
| Q13445                   | TMED1     | Transmembrane emp24 domain-containing protein 1                          | +                          | +                           | 1                                           | 1                                            | [1]                                |
| Q9H6X4                   | TMEM134   | Transmembrane protein 134                                                | +                          | +                           | 2                                           | 2                                            | -                                  |
| Q7Z7N9                   | TMEM179B  | Transmembrane protein 179B                                               | -                          | +                           | 2                                           | 3                                            | -                                  |
| Q8IY95                   | TMEM192   | Transmembrane protein 192                                                | +                          | +                           | 1                                           | 4                                            | -                                  |
| Q9H813                   | TMEM206   | Transmembrane protein 206                                                | +                          | -                           | 0                                           | 1                                            | [1]                                |
| Q9HOR3                   | TMEM222   | Transmembrane protein 222                                                | -                          | +                           | 1                                           | 3                                            | [1], [2]                           |
| Q9H330                   | TMEM245   | Transmembrane protein 245                                                | -                          | +                           | 2                                           | 14                                           | -                                  |
| Q86T03                   | TMEM55B   | Transmembrane protein 55B                                                | -                          | +                           | 1                                           | 2                                            | [1], [2], [3], [8]                 |
| Q94886                   | TMEM63A   | Transmembrane protein 63A                                                | +                          | +                           | 4                                           | 11                                           | [1], [2]                           |
| Q8NBN3                   | TMEM87A   | Transmembrane protein 87A                                                | -                          | +                           | 0                                           | 7                                            | -                                  |
| Q96BF3                   | TMIGD2    | Transmembrane and immunoglobulin domain-containing protein 2             | +                          | +                           | 0                                           | 1                                            | -                                  |
| Q6Z721                   | TMPPE     | Transmembrane protein with metallophosphoesterase domain                 | -                          | +                           | 1                                           | 5                                            | [2]                                |
| Q9H3N1                   | TMX1      | Thioredoxin-related transmembrane protein 1                              | +                          | +                           | 0                                           | 3                                            | [1], [2], [3], [5], [7], [8]       |
| Q96J17                   | TMX3      | Protein disulfide-isomerase TMX3                                         | +                          | +                           | 1                                           | 1                                            | [1], [2]                           |
| Q9H1E5                   | TMX4      | Thioredoxin-related transmembrane protein 4                              | +                          | +                           | 1                                           | 1                                            | [1], [2]                           |
| P28908                   | TNFRSF8   | Tumor necrosis factor receptor superfamily member 8                      | +                          | -                           | 1                                           | 1                                            | -                                  |
| O43557                   | TNFSF14   | Tumor necrosis factor ligand superfamily member 14                       | -                          | +                           | 0                                           | 1                                            | -                                  |
| Q9Y228                   | TRAF3IP3  | TRAF3-interacting JNK-activating modulator                               | +                          | +                           | 0                                           | 1                                            | [1]                                |
| O43617                   | TRAPPC3   | Trafficking protein particle complex subunit 3                           | +                          | -                           | 1                                           | 0                                            | [2], [3], [5]                      |
| Q86YW5                   | TREML1    | Trem-like transcript 1 protein                                           | -                          | +                           | 0                                           | 1                                            | -                                  |
| P49815                   | TSC2      | Tuberin                                                                  | -                          | +                           | 0                                           | 0                                            | -                                  |
| Q8NG11                   | TSPAN14   | Tetraspanin-14                                                           | +                          | -                           | 1                                           | 4                                            | [2], [6]                           |
| O95858                   | TSPAN15   | Tetraspanin-15                                                           | +                          | -                           | 3                                           | 4                                            | [2]                                |
| Q96S18                   | TSPAN18   | Tetraspanin-18 (Fragment)                                                | -                          | +                           | 6                                           | 4                                            | -                                  |
| Q86UF1                   | TSPAN33   | Tetraspanin-33                                                           | +                          | +                           | 3                                           | 4                                            | [2]                                |
| P41732                   | TSPAN7    | Tetraspanin-7                                                            | +                          | -                           | 4                                           | 4                                            | -                                  |
| O75954                   | TSPAN9    | Tetraspanin-9                                                            | -                          | +                           | 4                                           | 4                                            | [2]                                |
| Q8NFU3                   | TSTD1     | Thiosulfate sulfurtransferase/rhodanese-like domain-containing protein 1 | +                          | -                           | 0                                           | 0                                            | -                                  |
| Q9COH2                   | TTYH3     | Protein tteety homolog 3                                                 | -                          | +                           | 3                                           | 5                                            | [2], [8]                           |
| Q9Y3C8                   | UFC1      | Ubiquitin-fold modifier-conjugating enzyme 1                             | +                          | -                           | 1                                           | 0                                            | -                                  |
| O75385                   | ULK1      | Serine/threonine-protein kinase ULK1                                     | -                          | +                           | 3                                           | 0                                            | -                                  |
| P63027                   | VAMP2     | Vesicle-associated membrane protein 2                                    | -                          | +                           | 0                                           | 1                                            | [1], [5], [8]                      |
| Q15836                   | VAMP3     | Vesicle-associated membrane protein 3                                    | +                          | +                           | 0                                           | 1                                            | [1], [2], [3], [5]                 |
| O75379                   | VAMP4     | Vesicle-associated membrane protein 4                                    | +                          | +                           | 0                                           | 1                                            | [1], [2], [3], [8]                 |
| O95183                   | VAMP5     | Vesicle-associated membrane protein 5                                    | +                          | -                           | 0                                           | 1                                            | [1], [2], [3]                      |
| Q8IUH4                   | ZDHHC13   | Palmitoyltransferase ZDHHC13                                             | +                          | -                           | 1                                           | 6                                            | -                                  |
| Q8IUH5                   | ZDHHC17   | Palmitoyltransferase ZDHHC17                                             | +                          | +                           | 0                                           | 6                                            | [1]                                |
| Q9NUE0                   | ZDHHC18   | Palmitoyltransferase ZDHHC18                                             | -                          | +                           | 2                                           | 4                                            | -                                  |
| Q5W029                   | ZDHHC20   | Probable palmitoyltransferase ZDHHC20                                    | -                          | +                           | 2                                           | 4                                            | [1]                                |
| Q9C0B5                   | ZDHHC5    | Palmitoyltransferase ZDHHC5                                              | +                          | +                           | 2                                           | 4                                            | [1], [4]                           |

**Supplementary Table 4**

The "known" palmitome, proteins quantified in our studies and identified as palmitoylated in at least two published proteomic studies. "Known" palmitoylated proteins we identified as unpalmitoylated are shown in yellow.

<sup>a</sup>Palmitoylation sites predicted using CSS-Palm (version 3.0), with a "High" threshold and a cutoff score of 1.0. <sup>b</sup>Prediction of transmembrane domains was performed using TMHMM Server (version 2.0). <sup>c</sup>References: [1] Martin and Cravatt, Nat. Meth., 2009, [2] Dowal et al., Blood, 2011, [3] Merrick et al., Mol. & Cell. Proteom., 2011, [4] Yang et al., Mol. & Cell. Proteom., 2010, [5] Marin et al., Circ. Res., 2012, [6] Forrester et al., J. Lip. Res., 2011, [7] Wilson et al., Mol. & Cell. Proteom., 2011, [8] Kang et al., Nature, 2008.

| UniProt Accession Number | Gene Name | Protein                                                              | Enriched in Jurkat T cells | Enriched in Primary T cells | Predicted Palmitoylation Sites <sup>a</sup> | Predicted Transmembrane Helices <sup>b</sup> | Literature References <sup>c</sup> |
|--------------------------|-----------|----------------------------------------------------------------------|----------------------------|-----------------------------|---------------------------------------------|----------------------------------------------|------------------------------------|
| Q95870                   | ABHD16A   | Abhydrolase domain-containing protein 16A                            | -                          | +                           | 1                                           | 2                                            | [1], [8]                           |
| Q5V5T6                   | ABHD17B   | Alpha/beta hydrolase domain-containing protein 17B                   | +                          | +                           | 4                                           | 0                                            | [1], [3], [7]                      |
| P68133                   | ACTA1     | Actin, alpha skeletal muscle                                         | -                          | -                           | 1                                           | 0                                            | [1], [7]                           |
| P60709                   | ACTB      | Actin, cytoplasmic 1                                                 | -                          | -                           | 1                                           | 0                                            | [4], [5], [7]                      |
| Q43707                   | ACTN4     | Alpha-actinin-4                                                      | -                          | +                           | 0                                           | 0                                            | [4], [5]                           |
| O14672                   | ADAM10    | Disintegrin and metalloproteinase domain-containing protein 10       | -                          | +                           | 2                                           | 1                                            | [1], [8]                           |
| O43306                   | ADCY6     | Adenylate cyclase type 6                                             | -                          | +                           | 0                                           | 12                                           | [2], [8]                           |
| Q9Y4W6                   | AFG3L2    | AFG3-like protein 2                                                  | -                          | -                           | 2                                           | 2                                            | [2], [8]                           |
| Q99943                   | AGPAT1    | 1-acyl-sn-glycerol-3-phosphate acyltransferase alpha                 | +                          | -                           | 0                                           | 3                                            | [1], [3], [8]                      |
| Q09666                   | AHNAK     | Neuroblast differentiation-associated protein AHNAK                  | -                          | -                           | 0                                           | 0                                            | [4], [5]                           |
| P04075                   | ALDOA     | Fructose-bisphosphate aldolase A                                     | -                          | -                           | 0                                           | 0                                            | [1], [6]                           |
| P84077                   | ARF1      | ADP-ribosylation factor 1                                            | -                          | -                           | 0                                           | 0                                            | [1], [7]                           |
| P18085                   | ARF4      | ADP-ribosylation factor 4                                            | -                          | -                           | 0                                           | 0                                            | [5], [7], [8]                      |
| P84085                   | ARF5      | ADP-ribosylation factor 5                                            | -                          | -                           | 0                                           | 0                                            | [2], [7], [8]                      |
| Q9NXU5                   | ARL15     | ADP-ribosylation factor-like protein 15                              | +                          | +                           | 0                                           | 0                                            | [1], [2], [3], [8]                 |
| Q13510                   | ASAH1     | Acid ceramidase                                                      | -                          | -                           | 1                                           | 0                                            | [2], [8]                           |
| Q9Y2G3                   | ATP11B    | Probable phospholipid-transporting ATPase 1F                         | +                          | +                           | 4                                           | 8                                            | [1], [2]                           |
| P05023                   | ATP1A1    | Sodium/potassium-transporting ATPase subunit alpha-1                 | -                          | -                           | 0                                           | 10                                           | [1], [2], [4], [6]                 |
| P25705                   | ATP5A1    | ATP synthase subunit alpha, mitochondrial                            | -                          | -                           | 0                                           | 0                                            | [5], [7]                           |
| P36542                   | ATP5C1    | ATP synthase subunit gamma, mitochondrial                            | -                          | -                           | 0                                           | 0                                            | [1], [6]                           |
| P48047                   | ATP5O     | ATP synthase subunit O, mitochondrial                                | -                          | -                           | 0                                           | 0                                            | [1], [8]                           |
| Q9Y487                   | ATP6VOA2  | V-type proton ATPase 116 kDa subunit a isoform 2                     | +                          | +                           | 1                                           | 6                                            | [1], [2]                           |
| Q07021                   | C1QBP     | Complement component 1 Q subcomponent-binding protein, mitochondrial | -                          | -                           | 0                                           | 0                                            | [2], [5], [7]                      |
| P27824                   | CANX      | Calnexin                                                             | +                          | +                           | 2                                           | 1                                            | [1], [3], [5], [7], [8]            |
| O15484                   | CAPN5     | Calpain-5                                                            | -                          | +                           | 1                                           | 0                                            | [4], [5], [8]                      |
| Q8ND76                   | CCNY      | Cyclin-Y                                                             | +                          | +                           | 2                                           | 0                                            | [1], [2], [3]                      |
| P78371                   | CCT2      | T-complex protein 1 subunit beta                                     | -                          | -                           | 1                                           | 0                                            | [1], [7]                           |
| P48643                   | CCT5      | T-complex protein 1 subunit epsilon                                  | -                          | -                           | 0                                           | 0                                            | [1], [5], [7]                      |
| P40227                   | CCT6A     | T-complex protein 1 subunit zeta                                     | -                          | -                           | 0                                           | 0                                            | [5], [7]                           |
| P50990                   | CCT8      | T-complex protein 1 subunit theta                                    | -                          | -                           | 1                                           | 0                                            | [5], [7]                           |
| P48509                   | CD151     | CD151 antigen                                                        | -                          | +                           | 7                                           | 4                                            | [2], [6]                           |
| P16671                   | CD36      | Platelet glycoprotein 4 (Fragment)                                   | -                          | +                           | 4                                           | 2                                            | [2], [3]                           |
| P28907                   | CD38      | ADP-ribosyl cyclase 1                                                | +                          | +                           | 2                                           | 1                                            | [1], [2], [4], [8]                 |
| P16070                   | CD44      | CD44 antigen (Fragment)                                              | -                          | +                           | 2                                           | 1                                            | [3], [5]                           |
| P08962                   | CD63      | CD63 antigen                                                         | -                          | +                           | 7                                           | 4                                            | [2], [5]                           |
| P27701                   | CD82      | CD82 antigen                                                         | +                          | +                           | 5                                           | 4                                            | [1], [2], [5], [7]                 |
| P14209                   | CD99      | CD99 antigen                                                         | +                          | +                           | 0                                           | 2                                            | [5], [6]                           |
| Q8TC22                   | CD99L2    | CD99 antigen-like protein 2                                          | -                          | +                           | 1                                           | 1                                            | [2], [8]                           |
| P60953                   | CDC42     | Cell division control protein 42 homolog                             | -                          | -                           | 2                                           | 0                                            | [2], [8]                           |
| Q9NRR3                   | CDC42SE2  | CDC42 small effector protein 2                                       | -                          | -                           | 3                                           | 0                                            | [1], [2]                           |
| P23528                   | CFL1      | Cofilin-1                                                            | -                          | -                           | 0                                           | 0                                            | [5], [7]                           |
| Q07065                   | CKAP4     | Cytoskeleton-associated protein 4                                    | +                          | +                           | 1                                           | 1                                            | [3], [4], [5]                      |
| Q00610                   | CLTC      | Clathrin heavy chain 1                                               | -                          | -                           | 0                                           | 0                                            | [1], [7]                           |
| Q9ULV4                   | CORO1C    | Coronin-1C                                                           | -                          | -                           | 0                                           | 0                                            | [4], [8]                           |
| O75976                   | CPD       | Carboxypeptidase D                                                   | -                          | -                           | 3                                           | 1                                            | [1], [8]                           |
| Q9HCP0                   | CSNK1G1   | Casein kinase I isoform gamma-1                                      | +                          | +                           | 3                                           | 0                                            | [1], [2], [8]                      |
| Q9Y6M4                   | CSNK1G3   | Casein kinase I isoform gamma-3                                      | -                          | +                           | 3                                           | 0                                            | [1], [2], [8]                      |
| O43169                   | CYB5B     | Cytochrome b5 type B                                                 | -                          | -                           | 0                                           | 1                                            | [2], [5], [7], [8]                 |
| P00387                   | CYB5R3    | NADH-cytochrome b5 reductase 3                                       | -                          | -                           | 0                                           | 0                                            | [1], [8]                           |
| P99999                   | CYCS      | Cytochrome c                                                         | -                          | -                           | 0                                           | 0                                            | [6], [8]                           |
| Q9Y4D1                   | DAAM1     | Disheveled-associated activator of morphogenesis 1                   | +                          | +                           | 1                                           | 0                                            | [1], [2], [8]                      |
| Q14118                   | DAG1      | Dystroglycan                                                         | -                          | -                           | 2                                           | 1                                            | [2], [5], [8]                      |
| Q8NCG7                   | DAGLB     | Sn1-specific diacylglycerol lipase beta                              | +                          | +                           | 3                                           | 4                                            | [1], [2], [3]                      |
| Q08211                   | DHX9      | ATP-dependent RNA helicase A                                         | -                          | -                           | 1                                           | 0                                            | [4], [7]                           |
| Q9NVH1                   | DNAJC11   | DnaJ homolog subfamily C member 11                                   | -                          | -                           | 0                                           | 0                                            | [1], [8]                           |
| Q9H3Z4                   | DNAJC5    | DnaJ homolog subfamily C member 5                                    | +                          | +                           | 13                                          | 1                                            | [1], [2], [3]                      |
| Q16555                   | DPYSL2    | Dihydropyrimidinase-related protein 2                                | -                          | -                           | 0                                           | 0                                            | [4], [5]                           |
| O00559                   | EBAG9     | Receptor-binding cancer antigen expressed on SiSo cells              | +                          | -                           | 1                                           | 0                                            | [1], [2], [8]                      |
| P42892                   | ECE1      | Endothelin-converting enzyme 1                                       | +                          | +                           | 0                                           | 1                                            | [2], [5]                           |
| P68104                   | EEF1A1    | Elongation factor 1-alpha 1                                          | -                          | -                           | 0                                           | 0                                            | [7], [8]                           |
| P26641                   | EEF1G     | Elongation factor 1-gamma                                            | -                          | -                           | 0                                           | 0                                            | [1], [6], [8]                      |
| P13639                   | EEF2      | Elongation factor 2                                                  | -                          | -                           | 1                                           | 0                                            | [1], [5], [7]                      |
| Q14156                   | EFR3A     | Protein EFR3 homolog A                                               | -                          | +                           | 4                                           | 0                                            | [2], [3]                           |
| P63241                   | EIF5A     | Eukaryotic translation initiation factor 5A-1                        | -                          | -                           | 0                                           | 0                                            | [1], [2], [6]                      |
| P06733                   | ENO1      | Alpha-enolase                                                        | -                          | -                           | 0                                           | 0                                            | [5], [7]                           |
| P07814                   | EPRS      | Bifunctional glutamate/proline-tRNA ligase                           | -                          | -                           | 1                                           | 0                                            | [1], [8]                           |
| Q96RT1                   | ERBB2IP   | Protein LAP2                                                         | -                          | +                           | 3                                           | 0                                            | [1], [2]                           |
| Q9Y282                   | ERGIC3    | Endoplasmic reticulum-Golgi intermediate compartment protein 3       | +                          | +                           | 0                                           | 2                                            | [1], [2], [3], [5], [8]            |
| Q9BSJ8                   | ESYT1     | Extended synaptotagmin-1                                             | -                          | -                           | 0                                           | 2                                            | [1], [6]                           |
| Q9NUQ9                   | FAM49B    | Protein FAM49B                                                       | +                          | +                           | 0                                           | 0                                            | [1], [2]                           |
| P49327                   | FASN      | Fatty acid synthase                                                  | -                          | -                           | 1                                           | 0                                            | [5], [6]                           |
| P21333                   | FLNA      | Filamin-A                                                            | -                          | -                           | 0                                           | 0                                            | [1], [4]                           |
| O75369                   | FLNB      | Filamin-B                                                            | -                          | -                           | 0                                           | 0                                            | [1], [4], [5]                      |
| O75955                   | FLOT1     | Flotillin-1                                                          | +                          | +                           | 1                                           | 0                                            | [1], [2], [3], [4], [5]            |
| Q14254                   | FLOT2     | Flotillin-2                                                          | +                          | +                           | 3                                           | 0                                            | [1], [2], [3], [5]                 |
| P06241                   | FYN       | Tyrosine-protein kinase Fyn                                          | -                          | +                           | 4                                           | 0                                            | [1], [2], [3], [5]                 |
| P04406                   | GAPDH     | Glyceraldehyde-3-phosphate dehydrogenase                             | -                          | -                           | 1                                           | 0                                            | [4], [6], [7]                      |
| Q92896                   | GLG1      | Golgi apparatus protein 1                                            | -                          | -                           | 2                                           | 1                                            | [1], [3], [8]                      |
| P29992                   | GNA11     | Guanine nucleotide-binding protein subunit alpha-11                  | -                          | +                           | 2                                           | 0                                            | [1], [2], [4], [5], [6]            |
| Q14344                   | GNA13     | Guanine nucleotide-binding protein subunit alpha-13                  | +                          | +                           | 2                                           | 0                                            | [1], [2], [4], [5]                 |
| P30679                   | GNA15     | Guanine nucleotide-binding protein subunit alpha-15                  | +                          | -                           | 3                                           | 0                                            | [1], [2]                           |
| P50148                   | GNAQ      | Guanine nucleotide-binding protein G(q) subunit alpha                | +                          | +                           | 2                                           | 0                                            | [1], [2], [3], [4], [5]            |
| P63244                   | GNB2L1    | Guanine nucleotide-binding protein subunit beta-2-like 1             | -                          | -                           | 0                                           | 0                                            | [5], [7]                           |
| Q7Z5G4                   | GOLGA7    | Golgin subfamily A member 7                                          | +                          | +                           | 0                                           | 0                                            | [1], [2], [3]                      |
| P09211                   | GSTP1     | Glutathione S-transferase P                                          | -                          | -                           | 0                                           | 0                                            | [1], [7]                           |
| P40939                   | HADHA     | Trifunctional enzyme subunit alpha, mitochondrial                    | -                          | -                           | 1                                           | 0                                            | [1], [8]                           |
| P01889                   | HLA-B     | HLA class I histocompatibility antigen, B-7 alpha chain              | +                          | -                           | 2                                           | 1                                            | [1], [4]                           |
| P09651                   | HNRNPA1   | Heterogeneous nuclear ribonucleoprotein A1                           | -                          | -                           | 0                                           | 0                                            | [5], [7], [8]                      |
| P22626                   | HNRNPA2B1 | Heterogeneous nuclear ribonucleoproteins A2/B1                       | -                          | -                           | 0                                           | 0                                            | [5], [7], [8]                      |
| P61978                   | HNRNPK    | Heterogeneous nuclear ribonucleoprotein K                            | -                          | -                           | 0                                           | 0                                            | [5], [7]                           |
| Q00839                   | HNRNPU    | Heterogeneous nuclear ribonucleoprotein U                            | -                          | -                           | 0                                           | 0                                            | [7], [8]                           |
| P01112                   | HRAS      | GTPase HRas                                                          | +                          | -                           | 3                                           | 0                                            | [1], [2], [5], [6]                 |
| Q99714                   | HSD17B10  | 3-hydroxyacyl-CoA dehydrogenase type-2                               | -                          | -                           | 1                                           | 0                                            | [1], [7]                           |
| Q53G00                   | HSD17B12  | Estradiol 17-beta-dehydrogenase 12                                   | -                          | -                           | 1                                           | 3                                            | [3], [8]                           |
| P08107                   | HSPA1A    | Heat shock 70 kDa protein 1A/1B                                      | -                          | -                           | 0                                           | 0                                            | [1], [7]                           |

| UniProt Accession Number | Gene Name | Protein                                                                  | Enriched in Jurkat T cells | Enriched in Primary T cells | Predicted Palmitoylation Sites <sup>a</sup> | Predicted Transmembrane Helices <sup>b</sup> | Literature References <sup>c</sup> |
|--------------------------|-----------|--------------------------------------------------------------------------|----------------------------|-----------------------------|---------------------------------------------|----------------------------------------------|------------------------------------|
| P38646                   | HSPA9     | Stress-70 protein, mitochondrial                                         | -                          | -                           | 0                                           | 0                                            | [6], [7]                           |
| P10809                   | HSPD1     | 60 kDa heat shock protein, mitochondrial                                 | -                          | -                           | 0                                           | 0                                            | [5], [7]                           |
| Q01629                   | IFITM2    | Interferon-induced transmembrane protein 1                               | +                          | -                           | 3                                           | 2                                            | [3], [5]                           |
| Q01628                   | IFITM3    | Interferon-induced transmembrane protein 3                               | -                          | +                           | 3                                           | 2                                            | [2], [3], [5]                      |
| P11717                   | IGF2R     | Cation-independent mannose-6-phosphate receptor                          | +                          | -                           | 3                                           | 1                                            | [1], [3], [7], [8]                 |
| Q969P0                   | IGSF8     | Immunoglobulin superfamily member 8                                      | +                          | +                           | 2                                           | 1                                            | [1], [8]                           |
| Q14642                   | INPP5A    | Type I inositol 1,4,5-trisphosphate 5-phosphatase                        | -                          | -                           | 1                                           | 0                                            | [2], [8]                           |
| O00410                   | IPOS      | Importin-5                                                               | -                          | -                           | 2                                           | 0                                            | [1], [7], [8]                      |
| Q9BX67                   | JAM3      | Junctional adhesion molecule C                                           | +                          | +                           | 3                                           | 1                                            | [2], [8]                           |
| P14923                   | JUP       | Junction plakoglobin                                                     | -                          | -                           | 0                                           | 0                                            | [4], [5]                           |
| Q8IYS2                   | KIAA2013  | Uncharacterized protein KIAA2013                                         | +                          | +                           | 0                                           | 2                                            | [1], [2], [3]                      |
| Q14974                   | KPNB1     | Importin subunit beta-1                                                  | -                          | -                           | 2                                           | 0                                            | [1], [7]                           |
| Q6IAA8                   | LAMTOR1   | Regulator complex protein LAMTOR1                                        | +                          | -                           | 2                                           | 0                                            | [1], [5], [7]                      |
| O43561                   | LAT       | Linker for activation of T-cells family member 1                         | +                          | +                           | 3                                           | 1                                            | [1], [2], [3]                      |
| P06239                   | LCK       | Tyrosine-protein kinase Lck                                              | +                          | +                           | 2                                           | 0                                            | [1], [5]                           |
| P07195                   | LDHB      | L-lactate dehydrogenase B chain                                          | -                          | -                           | 0                                           | 0                                            | [5], [7], [8]                      |
| Q9UIQ6                   | LNPEP     | Leucyl-cystinyl aminopeptidase                                           | -                          | +                           | 0                                           | 1                                            | [1], [2], [3]                      |
| Q8NF37                   | LPCAT1    | Lysophosphatidylcholine acyltransferase 1                                | -                          | -                           | 1                                           | 1                                            | [2], [8]                           |
| P20645                   | M6PR      | Cation-dependent mannose-6-phosphate receptor                            | +                          | +                           | 2                                           | 1                                            | [2], [4]                           |
| Q68D91                   | MBLAC2    | Metallo-beta-lactamase domain-containing protein 2                       | +                          | +                           | 0                                           | 0                                            | [2], [6]                           |
| P43121                   | MCAM      | Cell surface glycoprotein MUC18                                          | -                          | -                           | 3                                           | 1                                            | [5], [8]                           |
| P40926                   | MDH2      | Malate dehydrogenase, mitochondrial                                      | -                          | -                           | 2                                           | 0                                            | [5], [7]                           |
| Q14880                   | MGST3     | Microsomal glutathione S-transferase 3                                   | -                          | -                           | 2                                           | 4                                            | [1], [6]                           |
| Q14165                   | MLEC      | Malectin                                                                 | -                          | +                           | 2                                           | 1                                            | [1], [2], [3]                      |
| Q9BR72                   | MNF1      | Mitochondrial nucleoid factor 1                                          | +                          | +                           | 0                                           | 0                                            | [4], [5]                           |
| Q00013                   | MPP1      | 55 kDa erythrocyte membrane protein                                      | -                          | -                           | 1                                           | 0                                            | [2], [4]                           |
| Q9NZW5                   | MPP6      | MAGUK p55 subfamily member 6                                             | -                          | +                           | 0                                           | 0                                            | [1], [4], [6]                      |
| P25325                   | MPST      | 3-mercaptopyruvate sulfurtransferase                                     | -                          | -                           | 0                                           | 0                                            | [2], [8]                           |
| Q86UE4                   | MTDH      | Protein LYRIC                                                            | +                          | +                           | 1                                           | 1                                            | [1], [2], [3], [5], [8]            |
| P35579                   | MYH9      | Myosin-9                                                                 | -                          | -                           | 0                                           | 0                                            | [7], [8]                           |
| B011T2                   | MYO1G     | Unconventional myosin-1g                                                 | -                          | -                           | 0                                           | 0                                            | [1], [7]                           |
| Q9NZM1                   | MYOF      | Myoferlin                                                                | -                          | +                           | 0                                           | 1                                            | [3], [4], [5]                      |
| Q9BT67                   | NDPIP1    | NEDD4 family-interacting protein 1                                       | -                          | -                           | 1                                           | 3                                            | [1], [4]                           |
| Q13423                   | NNT       | NAD(P) transhydrogenase, mitochondrial                                   | -                          | -                           | 1                                           | 12                                           | [1], [2], [8]                      |
| Q15233                   | NONO      | Non-POU domain-containing octamer-binding protein                        | -                          | -                           | 0                                           | 0                                            | [1], [4]                           |
| P06748                   | NPM1      | Nucleophosmin                                                            | -                          | -                           | 0                                           | 0                                            | [7], [8]                           |
| P01111                   | NRAS      | GTPase NRas                                                              | +                          | +                           | 2                                           | 0                                            | [2], [3], [5]                      |
| Q9NWU1                   | OXSM      | 3-oxoacyl-[acyl-carrier-protein] synthase, mitochondrial                 | +                          | +                           | 2                                           | 0                                            | [2], [4], [5]                      |
| P07237                   | P4HB      | Protein disulfide-isomerase                                              | -                          | -                           | 1                                           | 0                                            | [6], [7]                           |
| P07737                   | PFN1      | Profilin-1                                                               | -                          | -                           | 0                                           | 0                                            | [5], [7], [8]                      |
| Q9BTU6                   | PI4K2A    | Phosphatidylinositol 4-kinase type 2-alpha                               | +                          | +                           | 3                                           | 0                                            | [1], [2], [3], [5]                 |
| Q8TCG2                   | PI4K2B    | Phosphatidylinositol 4-kinase type 2-beta                                | +                          | +                           | 4                                           | 0                                            | [1], [2]                           |
| P14618                   | PKM       | Pyruvate kinase isozymes M1/M2                                           | -                          | -                           | 2                                           | 0                                            | [5], [7]                           |
| Q04941                   | PLP2      | Proteolipid protein 2                                                    | -                          | -                           | 0                                           | 4                                            | [2], [4]                           |
| Q15162                   | PLSCR1    | Phospholipid scramblase 1                                                | +                          | +                           | 7                                           | 0                                            | [2], [3], [4]                      |
| Q9NRY6                   | PLSCR3    | Phospholipid scramblase 3                                                | +                          | +                           | 7                                           | 0                                            | [2], [3], [4], [5]                 |
| P23284                   | PPIB      | Peptidyl-prolyl cis-trans isomerase B                                    | -                          | -                           | 0                                           | 1                                            | [7], [8]                           |
| O60831                   | PRAF2     | PRA1 family protein 2                                                    | -                          | -                           | 0                                           | 4                                            | [1], [2], [3], [8]                 |
| Q06830                   | PRDX1     | Peroxioredoxin-1                                                         | -                          | -                           | 0                                           | 0                                            | [7], [8]                           |
| P30041                   | PRDX6     | Peroxioredoxin-6                                                         | -                          | -                           | 0                                           | 0                                            | [5], [8]                           |
| Q9UM54                   | PRPF19    | Pre-mRNA-processing factor 19                                            | -                          | -                           | 2                                           | 0                                            | [1], [4]                           |
| Q9UL46                   | PSME2     | Proteasome activator complex subunit 2                                   | -                          | -                           | 1                                           | 0                                            | [1], [7]                           |
| P26599                   | PTBP1     | Polypyrimidine tract-binding protein 1                                   | -                          | -                           | 2                                           | 0                                            | [1], [3]                           |
| P53801                   | PTTG1IP   | Pituitary tumor-transforming gene 1 protein-interacting protein          | -                          | -                           | 6                                           | 2                                            | [1], [2]                           |
| P61026                   | RAB10     | Ras-related protein Rab-10                                               | -                          | -                           | 2                                           | 0                                            | [5], [8]                           |
| P62820                   | RAB1A     | Ras-related protein Rab-1A                                               | -                          | -                           | 2                                           | 0                                            | [5], [7]                           |
| Q9H0U4                   | RAB1B     | Ras-related protein Rab-1B                                               | -                          | -                           | 2                                           | 0                                            | [1], [5], [7], [8]                 |
| P61019                   | RAB2A     | Ras-related protein Rab-2A                                               | -                          | -                           | 2                                           | 0                                            | [5], [8]                           |
| P51148                   | RAB5C     | Ras-related protein Rab-5C                                               | -                          | -                           | 1                                           | 0                                            | [1], [8]                           |
| P11233                   | RALA      | Ras-related protein Ral-A                                                | -                          | -                           | 2                                           | 0                                            | [3], [5], [8]                      |
| P11234                   | RALB      | Ras-related protein Ral-B                                                | +                          | -                           | 2                                           | 0                                            | [5], [8]                           |
| P62826                   | RAN       | GTP-binding nuclear protein Ran                                          | -                          | -                           | 0                                           | 0                                            | [5], [7], [8]                      |
| P10114                   | RAP2A     | Ras-related protein Rap-2a                                               | -                          | +                           | 2                                           | 0                                            | [1], [2]                           |
| P61225                   | RAP2B     | Ras-related protein Rap-2b                                               | +                          | +                           | 3                                           | 0                                            | [1], [2], [3], [5]                 |
| Q9Y3L5                   | RAP2C     | Ras-related protein Rap-2c                                               | +                          | +                           | 3                                           | 0                                            | [1], [2], [4], [5]                 |
| Q00765                   | REEP5     | Receptor expression-enhancing protein 5                                  | +                          | +                           | 0                                           | 2                                            | [5], [8]                           |
| Q14699                   | RFTN1     | Raftlin                                                                  | +                          | +                           | 1                                           | 0                                            | [1], [2]                           |
| P22670                   | RFX1      | MHC class II regulatory factor RFX1                                      | +                          | +                           | 0                                           | 0                                            | [1], [5]                           |
| P49795                   | RGS19     | Regulator of G-protein signaling 19                                      | +                          | -                           | 9                                           | 0                                            | [1], [2]                           |
| P27635                   | RPL10     | 60S ribosomal protein L10                                                | -                          | -                           | 0                                           | 0                                            | [1], [4], [6], [7]                 |
| P62906                   | RPL10A    | 60S ribosomal protein L10a                                               | -                          | -                           | 0                                           | 0                                            | [1], [4], [6]                      |
| P30050                   | RPL12     | 60S ribosomal protein L12                                                | -                          | -                           | 1                                           | 0                                            | [1], [4], [5], [7]                 |
| P61313                   | RPL15     | 60S ribosomal protein L15                                                | -                          | -                           | 0                                           | 0                                            | [6], [8]                           |
| Q02543                   | RPL18A    | 60S ribosomal protein L18a                                               | -                          | -                           | 0                                           | 0                                            | [1], [4]                           |
| P61353                   | RPL27     | 60S ribosomal protein L27                                                | -                          | -                           | 0                                           | 0                                            | [3], [8]                           |
| P39023                   | RPL3      | 60S ribosomal protein L3                                                 | -                          | -                           | 0                                           | 0                                            | [1], [3], [8]                      |
| P46777                   | RPL5      | 60S ribosomal protein L5                                                 | -                          | -                           | 0                                           | 0                                            | [1], [8]                           |
| Q02878                   | RPL6      | 60S ribosomal protein L6                                                 | -                          | -                           | 1                                           | 0                                            | [1], [8]                           |
| P62917                   | RPL8      | 60S ribosomal protein L8                                                 | -                          | -                           | 0                                           | 0                                            | [4], [8]                           |
| P32969                   | RPL9      | 60S ribosomal protein L9                                                 | -                          | -                           | 0                                           | 0                                            | [3], [5]                           |
| P05388                   | RPLP0     | 60S acidic ribosomal protein P0                                          | -                          | -                           | 0                                           | 0                                            | [4], [7]                           |
| P04843                   | RPN1      | Dolichyl-diphosphooligosaccharide--protein glycosyltransferase subunit 1 | -                          | -                           | 0                                           | 1                                            | [7], [8]                           |
| P04844                   | RPN2      | Dolichyl-diphosphooligosaccharide--protein glycosyltransferase subunit 2 | -                          | -                           | 0                                           | 4                                            | [3], [8]                           |
| P62249                   | RPS16     | 40S ribosomal protein S16                                                | -                          | -                           | 0                                           | 0                                            | [1], [6], [7]                      |
| P15880                   | RPS2      | 40S ribosomal protein S2                                                 | -                          | -                           | 0                                           | 0                                            | [1], [4]                           |
| P62266                   | RPS23     | 40S ribosomal protein S23                                                | -                          | -                           | 1                                           | 0                                            | [1], [6], [8]                      |
| P61247                   | RPS3A     | 40S ribosomal protein S3a                                                | -                          | -                           | 0                                           | 0                                            | [1], [7]                           |
| P46782                   | RPS5      | 40S ribosomal protein S5                                                 | -                          | -                           | 1                                           | 0                                            | [1], [6]                           |
| P62753                   | RPS6      | 40S ribosomal protein S6                                                 | -                          | -                           | 1                                           | 0                                            | [1], [5]                           |
| P10301                   | RRAS      | Ras-related protein R-Ras                                                | +                          | +                           | 2                                           | 0                                            | [1], [2], [3], [5], [8]            |
| P62070                   | RRAS2     | Ras-related protein R-Ras2                                               | +                          | +                           | 2                                           | 0                                            | [5], [8]                           |
| O95197                   | RTN3      | Reticulon-3 (Fragment)                                                   | -                          | -                           | 0                                           | 3                                            | [4], [8]                           |
| Q9NQC3                   | RTN4      | Reticulon-4                                                              | -                          | +                           | 0                                           | 2                                            | [1], [5]                           |
| Q9Y230                   | RUVBL2    | RuvB-like 2                                                              | -                          | -                           | 0                                           | 0                                            | [1], [4]                           |
| O15126                   | SCAMP1    | Secretory carrier-associated membrane protein 1                          | -                          | +                           | 0                                           | 4                                            | [1], [2], [3], [8]                 |
| O15127                   | SCAMP2    | Secretory carrier-associated membrane protein 2                          | +                          | +                           | 0                                           | 4                                            | [1], [2], [3], [8]                 |
| O14828                   | SCAMP3    | Secretory carrier-associated membrane protein 3                          | +                          | +                           | 0                                           | 4                                            | [1], [2], [3], [8]                 |
| Q14108                   | SCARB2    | Lysosome membrane protein 2                                              | +                          | +                           | 3                                           | 2                                            | [5], [8]                           |
| Q14160                   | SCRIB     | Protein scribble homolog                                                 | +                          | +                           | 1                                           | 0                                            | [1], [4]                           |
| Q92854                   | SEMA4D    | Semaphorin-4D                                                            | +                          | +                           | 2                                           | 2                                            | [1], [2], [8]                      |
| Q58719                   | SFT2D3    | Vesicle transport protein SFT2C                                          | +                          | +                           | 1                                           | 4                                            | [1], [2], [4]                      |
| P43007                   | SLC1A4    | Neutral amino acid transporter A                                         | -                          | -                           | 0                                           | 9                                            | [1], [8]                           |

| UniProt Accession Number | Gene Name | Protein                                                       | Enriched in Jurkat T cells | Enriched in Primary T cells | Predicted Palmitoylation Sites <sup>a</sup> | Predicted Transmembrane Helices <sup>b</sup> | Literature References <sup>c</sup> |
|--------------------------|-----------|---------------------------------------------------------------|----------------------------|-----------------------------|---------------------------------------------|----------------------------------------------|------------------------------------|
| Q15758                   | SLC1A5    | Neutral amino acid transporter B(0)                           | +                          | +                           | 0                                           | 9                                            | [1], [3], [4], [5], [7]            |
| Q00325                   | SLC25A3   | Phosphate carrier protein, mitochondrial                      | -                          | -                           | 0                                           | 2                                            | [1], [8]                           |
| P12236                   | SLC25A6   | ADP/ATP translocase 3                                         | -                          | -                           | 0                                           | 2                                            | [1], [7]                           |
| Q8TB61                   | SLC35B2   | Adenosine 3'-phospho 5'-phosphosulfate transporter 1          | -                          | +                           | 0                                           | 8                                            | [1], [3], [4]                      |
| Q96QD8                   | SLC38A2   | Sodium-coupled neutral amino acid transporter 2               | +                          | -                           | 0                                           | 9                                            | [1], [6]                           |
| Q8NB15                   | SLC43A3   | Solute carrier family 43 member 3                             | +                          | -                           | 1                                           | 11                                           | [1], [2]                           |
| Q8WW15                   | SLC44A1   | Choline transporter-like protein 1                            | +                          | +                           | 9                                           | 9                                            | [2], [3], [8]                      |
| Q8IWAS                   | SLC44A2   | Choline transporter-like protein 2                            | -                          | +                           | 6                                           | 11                                           | [2], [8]                           |
| Q9Y289                   | SLC5A6    | Sodium-dependent multivitamin transporter                     | -                          | -                           | 1                                           | 14                                           | [1], [4]                           |
| P30825                   | SLC7A1    | High affinity cationic amino acid transporter 1               | +                          | -                           | 2                                           | 14                                           | [1], [4], [8]                      |
| Q92581                   | SLC9A6    | Sodium/hydrogen exchanger 6                                   | -                          | -                           | 1                                           | 12                                           | [1], [8]                           |
| O00161                   | SNAP23    | Synaptosomal-associated protein 23                            | +                          | +                           | 6                                           | 0                                            | [1], [2], [3], [4], [5], [6], [7]  |
| Q99523                   | SORT1     | Sorilin                                                       | +                          | +                           | 1                                           | 1                                            | [1], [2], [8]                      |
| Q72699                   | SPRED1    | Sprouty-related, EVH1 domain-containing protein 1             | -                          | -                           | 4                                           | 0                                            | [3], [8]                           |
| P27105                   | STOM      | Erythrocyte band 7 integral membrane protein                  | -                          | +                           | 2                                           | 1                                            | [1], [2], [3], [4], [5]            |
| O60499                   | STX10     | Syntaxin-10                                                   | +                          | -                           | 1                                           | 1                                            | [1], [2]                           |
| O75558                   | STX11     | Syntaxin-11                                                   | +                          | +                           | 6                                           | 0                                            | [2], [5]                           |
| Q86Y82                   | STX12     | Syntaxin-12                                                   | +                          | +                           | 1                                           | 1                                            | [1], [2], [3], [5], [8]            |
| O43752                   | STX6      | Syntaxin-6                                                    | +                          | +                           | 1                                           | 1                                            | [1], [3], [5], [8]                 |
| O15400                   | STX7      | Syntaxin-7                                                    | +                          | +                           | 1                                           | 1                                            | [1], [3], [8]                      |
| Q9UNK0                   | STX8      | Syntaxin-8                                                    | +                          | +                           | 1                                           | 1                                            | [1], [2], [3], [8]                 |
| Q15260                   | SURF4     | Surfeit locus protein 4                                       | -                          | +                           | 0                                           | 5                                            | [1], [8]                           |
| Q8NHG7                   | SVIP      | Small VCP/p97-interacting protein                             | +                          | -                           | 1                                           | 0                                            | [2], [5]                           |
| P17987                   | TCP1      | T-complex protein 1 subunit alpha                             | -                          | -                           | 0                                           | 0                                            | [7], [8]                           |
| P02786                   | TFRC      | Transferrin receptor protein 1                                | -                          | +                           | 0                                           | 1                                            | [1], [2], [5]                      |
| Q32CQ8                   | TIMM50    | Mitochondrial import inner membrane translocase subunit TIM50 | -                          | -                           | 0                                           | 1                                            | [2], [6]                           |
| Q99805                   | TM9SF2    | Transmembrane 9 superfamily member 2                          | -                          | +                           | 0                                           | 9                                            | [6], [8]                           |
| Q9H0R3                   | TMEM222   | Transmembrane protein 222                                     | -                          | +                           | 1                                           | 3                                            | [1], [2]                           |
| Q86T03                   | TMEM55B   | Transmembrane protein 55B                                     | -                          | +                           | 1                                           | 2                                            | [1], [2], [3], [8]                 |
| O94886                   | TMEM63A   | Transmembrane protein 63A                                     | +                          | +                           | 4                                           | 11                                           | [1], [2]                           |
| Q5T3F8                   | TMEM63B   | Transmembrane protein 63B                                     | -                          | -                           | 6                                           | 11                                           | [2], [8]                           |
| Q9H3N1                   | TMX1      | Thioredoxin-related transmembrane protein 1                   | +                          | +                           | 0                                           | 3                                            | [1], [2], [3], [5], [7], [8]       |
| Q96J17                   | TMX3      | Protein disulfide-isomerase TMX3                              | +                          | +                           | 1                                           | 1                                            | [1], [2]                           |
| Q9H1E5                   | TMX4      | Thioredoxin-related transmembrane protein 4                   | +                          | +                           | 1                                           | 1                                            | [1], [2]                           |
| P06753                   | TPM3      | Tropomyosin alpha-3 chain                                     | -                          | -                           | 0                                           | 0                                            | [4], [5]                           |
| O43617                   | TRAPP3    | Trafficking protein particle complex subunit 3                | +                          | -                           | 1                                           | 0                                            | [2], [3], [5]                      |
| Q8NG11                   | TSPAN14   | Tetraspanin-14                                                | +                          | -                           | 1                                           | 4                                            | [2], [6]                           |
| Q9C0H2                   | TTYH3     | Protein tweety homolog 3                                      | -                          | +                           | 3                                           | 5                                            | [2], [8]                           |
| P49411                   | TUFM      | Elongation factor Tu, mitochondrial                           | -                          | -                           | 0                                           | 0                                            | [1], [6]                           |
| P47985                   | UQCRCF1   | Cytochrome b-c1 complex subunit Rieske, mitochondrial         | -                          | -                           | 0                                           | 0                                            | [2], [8]                           |
| Q96IX5                   | USMG5     | Up-regulated during skeletal muscle growth protein 5          | -                          | -                           | 0                                           | 1                                            | [1], [8]                           |
| P63027                   | VAMP2     | Vesicle-associated membrane protein 2                         | -                          | +                           | 0                                           | 1                                            | [1], [5], [8]                      |
| Q15836                   | VAMP3     | Vesicle-associated membrane protein 3                         | +                          | +                           | 0                                           | 1                                            | [1], [2], [3], [5]                 |
| O75379                   | VAMP4     | Vesicle-associated membrane protein 4                         | +                          | +                           | 0                                           | 1                                            | [1], [2], [3], [8]                 |
| O95183                   | VAMP5     | Vesicle-associated membrane protein 5                         | +                          | -                           | 0                                           | 1                                            | [1], [2], [3]                      |
| P51809                   | VAMP7     | Vesicle-associated membrane protein 7                         | -                          | -                           | 3                                           | 1                                            | [1], [2], [3], [8]                 |
| Q9POL0                   | VAPA      | Vesicle-associated membrane protein-associated protein A      | -                          | -                           | 0                                           | 1                                            | [1], [4], [8]                      |
| P21796                   | VDAC1     | Voltage-dependent anion-selective channel protein 1           | -                          | -                           | 0                                           | 0                                            | [7], [8]                           |
| P45880                   | VDAC2     | Voltage-dependent anion-selective channel protein 2           | -                          | -                           | 1                                           | 0                                            | [5], [7], [8]                      |
| Q9Y277                   | VDAC3     | Voltage-dependent anion-selective channel protein 3           | -                          | -                           | 1                                           | 0                                            | [5], [7], [8]                      |
| O14980                   | XPO1      | Exportin-1                                                    | -                          | -                           | 0                                           | 0                                            | [1], [8]                           |
| P07947                   | YES1      | Tyrosine-protein kinase Yes                                   | -                          | -                           | 1                                           | 0                                            | [1], [2], [4], [5]                 |
| P61981                   | YWHAG     | 14-3-3 protein gamma                                          | -                          | -                           | 1                                           | 0                                            | [1], [7]                           |
| P63104                   | YWHAZ     | 14-3-3 protein zeta/delta                                     | -                          | -                           | 0                                           | 0                                            | [5], [7]                           |
| Q9C0B5                   | ZDHC5     | Palmitoyltransferase ZDHC5                                    | +                          | +                           | 2                                           | 4                                            | [1], [4]                           |
| Q9H6R6                   | ZDHC6     | Palmitoyltransferase ZDHC6                                    | -                          | -                           | 2                                           | 4                                            | [1], [4]                           |

Supplementary Table 5

Palmitoylated proteins enriched in Jurkat T cells. Using quantification by SILAC-labeling, Isotopic ratios were measured (n=6). Ratios greater than 1.75 are considered "enriched" (red).

| UniProt Accession Number | Gene Name | Protein                                                                     | Isotopic Ratio (n = 6) |             |          |             |             |            |
|--------------------------|-----------|-----------------------------------------------------------------------------|------------------------|-------------|----------|-------------|-------------|------------|
|                          |           |                                                                             | Sample 1               | Sample 2    | Sample 3 | Sample 4    | Sample 5    | Sample 6   |
| Q9NP58                   | ABC6      | ATP-binding cassette sub-family B member 6, mitochondrial                   | -                      | -           | -        | 2.140915027 | 1.7747      | 1.53212091 |
| Q96G56                   | ABHD17A   | Alpha/beta hydrolase domain-containing protein 17A                          | -                      | 5.311520688 | 3.1391   | 4.156275977 | -           | -          |
| Q5V5T6                   | ABHD17B   | Alpha/beta hydrolase domain-containing protein 17B                          | 2.9262                 | 6.153467479 | 1.4059   | 16.63561352 | 1.6064      | 3.9698293  |
| P09110                   | ACAA1     | 3-ketoacyl-CoA thiolase, peroxisomal                                        | 2.3294                 | 2.30813618  | 1.8003   | 3.696994344 | 1.1785      | 1.71007405 |
| P24752                   | ACAT1     | Acetyl-CoA acetyltransferase, mitochondrial                                 | 3.3373                 | 3.56518949  | 1.1095   | 6.48466377  | 2.3659      | 2.37445091 |
| Q9BWD1                   | ACAT2     | Acetyl-CoA acetyltransferase, cytosolic                                     | 2.8561                 | 4.046944557 | 1.0271   | 7.72797527  | 4.165       | 4.3157395  |
| P78536                   | ADAM17    | Disintegrin and metalloproteinase domain-containing protein 17              | -                      | 2.088075004 | 1.369    | 5.231493591 | -           | -          |
| P51828                   | ADCY7     | Adenylate cyclase type 7                                                    | -                      | -           | -        | 7.664597225 | 2.0956      | 2.47114933 |
| Q99943                   | AGPAT1    | 1-acyl-sn-glycerol-3-phosphate acyltransferase alpha                        | -                      | -           | 1.8859   | 5.386479935 | -           | 0.65006826 |
| Q02252                   | ALDH6A1   | Methylmalonate-semialdehyde dehydrogenase [acylating], mitochondrial        | 1.68                   | 2.028767929 | 2.3747   | 5.391707554 | 2.5041      | 2.82877429 |
| Q9H6X2                   | ANTXR1    | Anthrax toxin receptor 1                                                    | -                      | -           | 2.1977   | 14.02131239 | -           | -          |
| Q63HQ0                   | AP1AR     | AP-1 complex-associated regulatory protein                                  | 10.219                 | 6.666222252 | 2.0496   | 7.183908046 | 4.9995      | 1.18890514 |
| Q9NXU5                   | ARL15     | ADP-ribosylation factor-like protein 15                                     | 15.177                 | 7.24847782  | 3.8864   | 22.51136824 | 1.6509      | 3.42641768 |
| Q8N6S5                   | ARL6IP6   | ADP-ribosylation factor-like protein 6-interacting protein 6                | -                      | -           | 1.9221   | 5.773005427 | 0.6546      | 10.6803375 |
| Q9Y2G3                   | ATP11B    | Probable phospholipid-transporting ATPase IF                                | -                      | -           | -        | 6.595870985 | 2.8025      | 0.39206461 |
| Q9Y487                   | ATP6VOA2  | V-type proton ATPase 116 kDa subunit a isoform 2                            | -                      | -           | -        | 4.488934776 | 2.0383      | 1.33445427 |
| O43861                   | ATP9B     | Probable phospholipid-transporting ATPase IIB                               | -                      | -           | -        | -           | 2.0655      | 2.10499726 |
| O75882                   | ATTRN     | Attractin                                                                   | -                      | -           | 1.7639   | 6.906077348 | -           | -          |
| Q9Y679                   | AUP1      | Ancient ubiquitous protein 1                                                | 11.099                 | 6.853539853 | 1.4259   | 26.32063801 | -           | -          |
| Q9Y679-3                 | AUP1      | Ancient ubiquitous protein 1                                                | -                      | -           | -        | -           | 1.9961      | 2.07934792 |
| O43505                   | B3GNT1    | N-acetyllactosaminide beta-1,3-N-acetylglucosaminyltransferase              | 3.3128                 | 4.107113521 | 1.5343   | 7.211885187 | -           | -          |
| P15291                   | B4GALT1   | Beta-1,4-galactosyltransferase 1                                            | -                      | 2.543623137 | 1.2587   | 10.85410991 | -           | -          |
| Q9UBV7                   | B4GALT7   | Beta-1,4-galactosyltransferase 7                                            | -                      | -           | -        | 3.3855      | 7.171029043 | -          |
| Q9HB09                   | BCL2L12   | Bcl-2-like protein 12                                                       | 12.952                 | 3.090999011 | 2.083    | 20.92225291 | -           | 0.55423156 |
| Q9NYM9                   | BET1L     | BET1-like protein                                                           | 4.2814                 | 9.478672986 | -        | -           | -           | 1.99740338 |
| Q10589                   | BST2      | Bone marrow stromal antigen 2                                               | 9.1743                 | 8.336112037 | 3.2629   | 25.57283142 | 4.0551      | 5.34302201 |
| Q6P1X6                   | C8orf82   | UPF0598 protein C8orf82                                                     | 2.62                   | 2.582511234 | 1.7354   | 5.060728745 | 1.0035      | 2.15081516 |
| P27824                   | CANX      | Calnexin                                                                    | 13.681                 | 5.833625015 | 2.055    | 20.87159793 | 1.7796      | 1.91545195 |
| Q8ND76                   | CCNY      | Cyclin-Y                                                                    | 4.5727                 | 2.956480605 | 3.0041   | 25.21177894 | -           | -          |
| Q8ND76-3                 | CCNY      | Cyclin-Y                                                                    | -                      | -           | -        | -           | 3.5083      | 1.81507968 |
| Q8N7R7                   | CCNYL1    | Cyclin-Y-like protein 1                                                     | -                      | -           | -        | 13.58917215 | 1.8942      | -          |
| P29017                   | CD1C      | T-cell surface glycoprotein CD1c                                            | 6.8256                 | 6.973500697 | 5.4573   | 16.05832383 | 3.7889      | 2.10530748 |
| P28907                   | CD38      | ADP-ribosyl cyclase 1                                                       | 8.0949                 | 6.078288354 | 2.667    | 8.276775368 | 5.2427      | 2.84438376 |
| P04234                   | CD3D      | T-cell surface glycoprotein CD3 delta chain                                 | 10.557                 | 5.145356316 | 1.5766   | 39.24800816 | 0.95407     | 4.9845479  |
| P06127                   | CD5       | T-cell surface glycoprotein CD5                                             | 4.8468                 | 1.72884755  | -        | 6.386511687 | 0.88502     | 1.86992782 |
| P19397                   | CD53      | Leukocyte surface antigen CD53                                              | -                      | -           | 2.3475   | -           | 2.2516      | 1.21256214 |
| P08962                   | CD63      | CD63 antigen                                                                | -                      | 1.406766547 | 4.5156   | 8.888098836 | -           | -          |
| P09564                   | CD7       | T-cell antigen CD7                                                          | 7.3952                 | 3.811847221 | -        | 24.53265296 | 1.6241      | 2.22138303 |
| P27701                   | CD82      | CD82 antigen                                                                | 5.1479                 | 1.846278825 | 1.7477   | 6.886103842 | 2.0204      | 3.27300101 |
| P48960-2                 | CD97      | CD97 antigen                                                                | 4.5209                 | -           | -        | 7.670476337 | -           | 1.52070439 |
| P14209                   | CD99      | CD99 antigen                                                                | 18.836                 | 8.619203586 | 1.9123   | 21.52898878 | -           | 10.1422964 |
| Q9NPF2                   | CHST11    | Carbohydrate sulfotransferase 11                                            | -                      | 2.738525578 | 1.1247   | 7.844367744 | -           | -          |
| Q07065                   | CKAP4     | Cytoskeleton-associated protein 4                                           | 3.3904                 | 5.191299382 | 4.6214   | 18.68984207 | -           | -          |
| O14967                   | CLGN      | Calmegin                                                                    | 4.1263                 | 3.855644664 | 1.3099   | 10.42850737 | -           | 0.81294204 |
| Q96DZ5                   | CLIP3     | CAP-Gly domain-containing linker protein 3                                  | -                      | 1.784598911 | 3.9795   | -           | -           | -          |
| Q6PIW8                   | CNST      | Consortin                                                                   | 6.5761                 | 2.677447857 | 1.5722   | 14.04987706 | 0.4262      | -          |
| Q9UI42                   | CPA4      | Carboxypeptidase A4                                                         | 0.34313                | 3.707136237 | -        | 4.388081969 | 0.14655     | 5.35589952 |
| Q9HCP0                   | CSNK1G1   | Casein kinase I isoform gamma-1                                             | -                      | 5.228211429 | 2.0426   | 10.77423665 | 3.7876      | 2.22227161 |
| P78368                   | CSNK1G2   | Casein kinase I isoform gamma-2                                             | -                      | 2.348465278 | 1.8179   | 6.315523557 | -           | 2.06189818 |
| Q9Y6M4-3                 | CSNK1G3   | Casein kinase I isoform gamma-3                                             | -                      | -           | 5.1398   | 8.00448251  | -           | -          |
| Q9GZU7-2                 | CTDSP1    | Carboxy-terminal domain RNA polymerase II polypeptide A small phosphatase 1 | 10.88                  | 3.390520106 | 3.0472   | 9.285051068 | 2.2822      | 0.97446891 |
| P78310-2                 | CXADR     | Coxsackievirus and adenovirus receptor                                      | -                      | -           | 2.0638   | 7.402472426 | -           | -          |
| Q9Y4D1                   | DAAM1     | Disheveled-associated activator of morphogenesis 1                          | -                      | -           | 1.7934   | 6.509145349 | -           | -          |
| Q8NCG7                   | DAGLB     | Sn1-specific diacylglycerol lipase beta                                     | -                      | -           | 0.97256  | 5.613877505 | 2.4191      | 3.10925937 |
| Q8IWE4                   | DCUN1D3   | DCN1-like protein 3                                                         | -                      | 2.792984024 | 2.0012   | 4.55996352  | -           | -          |
| Q9BSY9                   | DES12     | Desumoylating isopeptidase 2                                                | 3.5925                 | 6.518904824 | 1.6911   | 9.186110601 | -           | -          |
| Q9Y2H0                   | DLGAP4    | Disks large-associated protein 4                                            | 3.0485                 | -           | 0.73245  | 9.378223764 | -           | -          |
| Q9H3Z4                   | DNAJC5    | Dnal homolog subfamily C member 5                                           | 6.3101                 | 4.423408679 | 2.1511   | 8.697921197 | 1.8312      | 2.82565697 |
| Q14126                   | DSG2      | Desmoglein-2                                                                | -                      | 2.782492557 | 1.3883   | 6.893699159 | -           | -          |
| O00559                   | EBAG9     | Receptor-binding cancer antigen expressed on SiSo cells                     | 16.517                 | 13.41849606 | 3.9356   | 17.61369641 | -           | -          |
| P42892-3                 | ECE1      | Endothelin-converting enzyme 1                                              | 4.6406                 | 3.617028972 | 2.2127   | 7.47551768  | -           | -          |
| P42892                   | ECE1      | Endothelin-converting enzyme 1                                              | -                      | -           | -        | -           | 2.8864      | 2.01633229 |
| O75071                   | EFCAB14   | EF-hand calcium-binding domain-containing protein 14                        | -                      | 3.706037134 | 1.4858   | 7.519927809 | -           | -          |
| Q6PCB8                   | EMB       | Embigin                                                                     | 5.0413                 | 4.467875972 | 2.4819   | 7.438815741 | -           | -          |
| Q96RT1-7                 | ERBB2IP   | Protein LAP2                                                                | 7.1745                 | 3.71940787  | -        | -           | 2.208       | 3.12773677 |
| Q969X5                   | ERGIC1    | Endoplasmic reticulum-Golgi intermediate compartment protein 1              | 2.7667                 | 2.37428178  | 2.0485   | 3.12022216  | 1.4572      | 1.02853146 |
| Q9Y282                   | ERGIC3    | Endoplasmic reticulum-Golgi intermediate compartment protein 3              | 11.148                 | 4.890932212 | 2.3172   | 30.54367746 | 4.336       | 2.64005491 |
| P05413                   | FABP3     | Fatty acid-binding protein, heart                                           | -                      | -           | -        | 6.162188809 | 0.17359     | 12.7135883 |
| A8MNVW0                  | FAM171A2  | Protein FAM171A2                                                            | -                      | 1.782690079 | 1.8011   | 4.358817889 | -           | -          |
| Q8N128                   | FAM177A1  | Protein FAM177A1                                                            | 5.6223                 | 6.78794461  | 1.9932   | 11.30978636 | -           | -          |
| Q9NUQ9                   | FAM49B    | Protein FAM49B                                                              | 1.5986                 | 1.909745431 | 1.3181   | 1.920122888 | 2.4214      | 1.84600617 |
| P25445                   | FAS       | Tumor necrosis factor receptor superfamily member 6                         | 12.667                 | 7.054673721 | 1.9929   | 7.803964414 | 3.1657      | 0.70204999 |
| P02671                   | FGA       | Fibrinogen alpha chain                                                      | -                      | 4.880667675 | -        | -           | 0.35685     | 7.54034082 |
| P02675                   | FBG       | Fibrinogen beta chain                                                       | -                      | 2.113986132 | -        | -           | 1.5941      | 2.0949867  |
| O75955                   | FLOT1     | Flotillin-1                                                                 | -                      | -           | 1.5087   | 8.445232666 | 2.5506      | 1.86811134 |
| Q14254                   | FLOT2     | Flotillin-2                                                                 | -                      | -           | 0.83722  | 12.24619756 | 2.6952      | 2.53318472 |
| P06241-3                 | FYN       | Tyrosine-protein kinase Fyn                                                 | -                      | -           | -        | -           | 2.6307      | 2.70848569 |
| Q10472                   | GALNT1    | Polypeptide N-acetylgalactosaminyltransferase 1                             | -                      | -           | 2.4491   | 5.299417064 | -           | -          |
| Q8IXK2                   | GALNT12   | Polypeptide N-acetylgalactosaminyltransferase 12                            | -                      | -           | 2.0878   | 9.559315553 | 2.2892      | -          |
| Q9NY12                   | GAR1      | H/ACA ribonucleoprotein complex subunit 1                                   | 1.793                  | -           | 0.88743  | 1.853499407 | -           | -          |
| Q14344                   | GNA13     | Guanine nucleotide-binding protein subunit alpha-13                         | 7.0299                 | 2.482868209 | 1.697    | 10.75696783 | 3.4692      | 2.81214848 |
| P30679                   | GNA15     | Guanine nucleotide-binding protein subunit alpha-15                         | -                      | 2.86377044  | 2.3164   | 15.95048968 | -           | 1.04707656 |
| P50148                   | GNAQ      | Guanine nucleotide-binding protein G(q) subunit alpha                       | 8.932                  | 4.96056352  | 1.5043   | 19.27599368 | 6.759       | 4.80746118 |
| Q725G4                   | GOLGA7    | Golgin subfamily A member 7                                                 | 13.575                 | 19.56525992 | 6.5033   | 53.00259713 | 1.4748      | 13.6041465 |
| Q14789                   | GOLGB1    | Golgin subfamily B member 1                                                 | 2.2545                 | 1.940202945 | 1.2212   | 5.561735261 | -           | 0.43472591 |
| P07203                   | GPX1      | Glutathione peroxidase 1                                                    | 4.5595                 | 3.378834978 | 1.8988   | 6.559958016 | 1.0219      | 0.82528679 |
| Q8WW33                   | GTSF1     | Gametocyte-specific factor 1                                                | 3.8308                 | 0.982414776 | 0.78501  | 3.354016435 | -           | 3.03057854 |
| P01889                   | HLA-B     | HLA class I histocompatibility antigen, B-7 alpha chain                     | 6.5728                 | 9.92358837  | 2.8746   | 21.67128988 | 1.6652      | 1.73364308 |
| P30504                   | HLA-C     | HLA class I histocompatibility antigen, Cw-4 alpha chain                    | 6.7543                 | 3.318510652 | 3.7114   | 18.86756854 | 0.96048     | 4.47187193 |
| P00738                   | HP        | Haptoglobin                                                                 | -                      | 10.00750563 | -        | -           | 0.091044    | 5.70287995 |

| UniProt Accession Number | Gene Name | Protein                                                                  | Isotopic Ratio (n = 6) |             |          |             |          |            |
|--------------------------|-----------|--------------------------------------------------------------------------|------------------------|-------------|----------|-------------|----------|------------|
|                          |           |                                                                          | Sample 1               | Sample 2    | Sample 3 | Sample 4    | Sample 5 | Sample 6   |
| P01112                   | HRAS      | GTPase HRas                                                              | 3.3977                 | 1.972581122 | 2.5136   | 7.012622721 | 3.8985   | 4.07182703 |
| P13598                   | ICAM2     | Intercellular adhesion molecule 2                                        | 9.1994                 | 2.26418512  | 2.09     | 20.91044058 | -        | 1.50407605 |
| Q01629                   | IFITM2    | Interferon-induced transmembrane protein 1                               | 1.7107                 | 3.275252194 | -        | 17.18065458 | -        | -          |
| P17181                   | IFNAR1    | Interferon alpha/beta receptor 1                                         | -                      | -           | 2.8275   | 2.915961976 | -        | -          |
| P11717                   | IGF2R     | Cation-independent mannose-6-phosphate receptor                          | 7.1809                 | 2.983204558 | 2.0151   | 9.973072704 | 0.83999  | 0.87896634 |
| Q969P0                   | IGSF8     | Immunoglobulin superfamily member 8                                      | 3.2253                 | 1.750516402 | 1.2916   | 9.138261903 | 1.7519   | 2.21214467 |
| P24001-4                 | IL32      | Interleukin-32                                                           | 20.148                 | 5.178127589 | -        | -           | -        | -          |
| Q71H61                   | ILDR2     | Immunoglobulin-like domain-containing receptor 2                         | -                      | -           | -        | -           | 3.8548   | 3.95131974 |
| Q9H0X4                   | ITFG3     | Protein ITFG3                                                            | -                      | 5.448403618 | 1.9304   | 8.074935401 | 1.9025   | 2.15410465 |
| P23229-4                 | ITGA6     | Integrin alpha-6                                                         | 4.465                  | 3.569388921 | 1.9296   | 4.272043746 | -        | -          |
| O43736                   | ITM2A     | Integral membrane protein 2A                                             | 11.25                  | 8.739730816 | 3.7188   | 18.30362046 | 0.15738  | 5.9407117  |
| Q9Y287                   | ITM2B     | Integral membrane protein 2B                                             | 4.6806                 | 2.569967361 | 2.5127   | 16.06425703 | 0.19134  | 1.78740594 |
| Q9NQX7                   | ITM2C     | Integral membrane protein 2C                                             | 6.4667                 | 4.090146836 | 1.1003   | 10.82063712 | -        | -          |
| Q9BX67                   | JAM3      | Junctional adhesion molecule C                                           | 18.772                 | 3.956165684 | 3.1739   | 19.79805979 | -        | -          |
| Q8IZA0                   | KIAA0319L | Dyslexia-associated protein KIAA0319-like protein                        | 1.4647                 | 3.665017409 | 1.8945   | 9.974067425 | -        | -          |
| A2VDJ0                   | KIAA0922  | Transmembrane protein 131-like                                           | -                      | -           | -        | 1.869648132 | 0.38635  | 2.00232269 |
| Q8IYS2                   | KIAA2013  | Uncharacterized protein KIAA2013                                         | 4.2068                 | 4.499032708 | 1.9493   | 9.55474871  | -        | 1.53579162 |
| P43630                   | KIR3DL2   | Killer cell immunoglobulin-like receptor 3DL2                            | 5.1184                 | 3.766620212 | 1.7172   | 9.249838128 | 0.99442  | 1.80648891 |
| Q6UWL6-3                 | KIRREL2   | Kin of IRRE-like protein 2                                               | -                      | 2.799160252 | -        | 4.645544922 | -        | -          |
| Q6GTX8                   | LAIR1     | Leukocyte-associated immunoglobulin-like receptor 1                      | 3.8571                 | 3.509018177 | 1.3988   | 8.486803021 | -        | -          |
| Q6IAA8                   | LAMTOR1   | Ragulator complex protein LAMTOR1                                        | 10.792                 | 5.797101449 | 2.4898   | 35.85643085 | 4.9782   | 3.78300673 |
| O43561                   | LAT       | Linker for activation of T-cells family member 1                         | 6.7578                 | 3.591825006 | 6.2919   | 39.47108743 | -        | -          |
| P06239                   | LCK       | Tyrosine-protein kinase Lck                                              | 1.9895                 | 2.011424893 | 1.0827   | 6.097932801 | 2.0917   | 1.97694878 |
| Q9H400                   | LIME1     | Lck-interacting transmembrane adapter 1                                  | 2.9647                 | 10.99323916 | 1.8727   | 22.89220063 | 0.79087  | 3.50704917 |
| Q8IWIU2                  | LMTK2     | Serine/threonine-protein kinase LMTK2                                    | -                      | -           | 1.8794   | 5.994485074 | -        | -          |
| Q9UIQ6-3                 | LNPEP     | Leucyl-cystinyl aminopeptidase                                           | 6.7395                 | 3.03039486  | -        | -           | -        | -          |
| Q9Y561                   | LRP12     | Low-density lipoprotein receptor-related protein 12                      | -                      | 3.216571778 | 0.81674  | 8.805142203 | -        | -          |
| Q9BTT6                   | LRRC1     | Leucine-rich repeat-containing protein 1                                 | 6.1882                 | 4.087806074 | 2.0843   | 17.07475327 | 2.3535   | 2.60633862 |
| P20645                   | M6PR      | Cation-dependent mannose-6-phosphate receptor                            | 10.263                 | 5.243288591 | 1.3161   | 35.82560097 | 4.7652   | 5.87889477 |
| Q9UKM7                   | MAN1B1    | Endoplasmic reticulum mannosyl-oligosaccharide 1,2-alpha-mannosidase     | 3.4462                 | 2.370960476 | 1.567    | 8.577800652 | -        | 1.23800681 |
| Q68D91                   | MBLAC2    | Metallo-beta-lactamase domain-containing protein 2                       | 5.4226                 | 7.85792865  | 2.0568   | 14.04908751 | 2.0863   | 1.40120784 |
| Q9GZU1                   | MCOLN1    | Mucopolipin-1                                                            | 2.021                  | -           | 0.14993  | -           | 2.8245   | 2.55460467 |
| Q29980                   | MICB      | MHC class I polypeptide-related sequence B                               | -                      | -           | 2.3403   | 6.629101757 | -        | -          |
| Q8IVH4                   | MMAA      | Methylmalonic aciduria type A protein, mitochondrial                     | -                      | 1.975972178 | 1.5708   | 2.636783125 | 0.83439  | 2.06778189 |
| Q9BRT2                   | MNFI      | Mitochondrial nucleoid factor 1                                          | 23.673                 | 12.29377198 | 2.5562   | 67.03311436 | 3.5282   | 4.84284953 |
| P05164                   | MPO       | Myeloperoxidase                                                          | 0.13                   | 3.326458652 | -        | -           | -        | 3.07021584 |
| Q8N565                   | MREG      | Melanoregulin                                                            | 12.747                 | 0.651508242 | 3.6642   | 12.4331717  | 3.1671   | 4.01445203 |
| Q9Y3D2                   | MSRB2     | Methionine-R-sulfoxide reductase B2, mitochondrial                       | -                      | 2.323042256 | -        | 6.653802648 | -        | 0.90925623 |
| Q86UE4                   | MTDH      | Protein LYRIC                                                            | 9.8282                 | 5.525472428 | 2.0559   | 20.55582963 | 1.6771   | 2.23813787 |
| O75570                   | MTRF1     | Peptide chain release factor 1, mitochondrial                            | -                      | 2.358601821 | 1.2648   | 4.510396464 | -        | -          |
| Q96S97                   | MYADM     | Myeloid-associated differentiation marker                                | -                      | -           | -        | 7.466029565 | 1.0477   | 2.32018561 |
| Q92542                   | NCSTN     | Nicastrin                                                                | 6.3118                 | 4.637358561 | 2.1721   | 3.314550878 | 1.5015   | 2.10921516 |
| O14561                   | NDUFAB1   | Acyl carrier protein                                                     | -                      | 5.340739158 | -        | -           | 3.7246   | 2.56121299 |
| O15118                   | NPC1      | Niemann-Pick C1 protein                                                  | 6.5396                 | 2.051239975 | 1.9427   | 12.32559286 | 2.3195   | 3.44376334 |
| P01111                   | NRAS      | GTPase NRas                                                              | 4.7295                 | 3.695354939 | 1.1609   | 15.47819896 | -        | -          |
| Q9NWU1                   | OXSM      | 3-oxoacyl-[acyl-carrier-protein] synthase, mitochondrial                 | -                      | 2.535882741 | 2.0647   | 8.952551477 | 1.8434   | 3.2528788  |
| Q9UKS6                   | PACSN3    | Protein kinase C and casein kinase substrate in neurons protein 3        | 3.0397                 | 1.212944544 | 2.1974   | 5.25265259  | -        | 1.5157716  |
| Q9NWX8                   | PAG1      | Phosphoprotein associated with glycosphingolipid-enriched microdomains 1 | 6.488                  | 3.308738378 | 2.0375   | 12.3542202  | 2.823    | 1.5639173  |
| O00330                   | PDHX      | Pyruvate dehydrogenase protein X component, mitochondrial                | 8.6809                 | 7.661661048 | 2.6252   | 13.16898441 | 3.1647   | 3.64657404 |
| P16284                   | PECAM1    | Platelet endothelial cell adhesion molecule                              | -                      | -           | 1.9553   | 11.10457175 | -        | -          |
| Q9BTU6                   | PI4K2A    | Phosphatidylinositol 4-kinase type 2-alpha                               | 9.1128                 | 4.709428275 | 2.0435   | 12.96932754 | 2.7377   | 1.73731758 |
| Q8TCG2                   | PI4K2B    | Phosphatidylinositol 4-kinase type 2-beta                                | 4.062                  | 3.67606514  | 2.3816   | 14.17273732 | -        | 1.27798493 |
| Q99569                   | PKP4      | Plakophilin-4                                                            | -                      | 1.755617978 | 4.4008   | 6.564264146 | -        | -          |
| O15162                   | PLSCR1    | Phospholipid scramblase 1                                                | 6.5093                 | 4.660266567 | 2.268    | 10.3943621  | 3.772    | 2.00128082 |
| Q9NRY6                   | PLSCR3    | Phospholipid scramblase 3                                                | 4.1738                 | 3.160256613 | 6.0434   | 7.100759781 | 2.0556   | 1.46730837 |
| O00592                   | PODXL     | Podocalyxin                                                              | 44.543                 | 0.471120324 | 9.2956   | 4.376559149 | -        | -          |
| A8CG34                   | POM121C   | Nuclear envelope pore membrane protein POM 121C                          | 2.5956                 | 1.491357583 | 2.1121   | 4.463090244 | -        | -          |
| P49768                   | PSEN1     | Presenilin-1                                                             | -                      | -           | -        | 2.172590597 | 1.8599   | 1.78536359 |
| Q13308                   | PTK7      | Inactive tyrosine-protein kinase 7                                       | 5.89                   | 6.342360627 | 1.6623   | 7.04920344  | 0.94324  | 1.78986934 |
| P15151-3                 | PVR       | Poliovirus receptor                                                      | 15.068                 | 11.19758132 | 4.0131   | 13.80891227 | 8.1555   | 1.67073211 |
| P11234                   | RALB      | Ras-related protein Ral-B                                                | -                      | -           | 1.6271   | 1.824018678 | 2.8843   | 5.56173526 |
| P61225                   | RAP2B     | Ras-related protein Rap-2b                                               | 4.8701                 | 5.580668564 | 2.9996   | 12.53321301 | 4.9271   | 5.10152025 |
| Q9Y3L5                   | RAP2C     | Ras-related protein Rap-2c                                               | 3.558                  | 3.879126421 | 2.7232   | 10.92466352 | 5.191    | 4.90797546 |
| Q00765                   | REEP5     | Receptor expression-enhancing protein 5                                  | 4.9344                 | 2.743710045 | 1.4621   | 7.125044532 | 1.3941   | 1.86379394 |
| Q8IUW5                   | RELL1     | RELT-like protein 1                                                      | -                      | -           | 2.0012   | 17.58674663 | -        | -          |
| Q14699                   | RFTN1     | Raftlin                                                                  | 1.9438                 | 1.984875251 | 1.5233   | 6.611133148 | -        | -          |
| P22670                   | RFX1      | MHC class II regulatory factor RFX1                                      | 5.0228                 | 3.059507419 | 1.9136   | 8.379420144 | -        | -          |
| P49795                   | RG519     | Regulator of G-protein signaling 19                                      | 4.9352                 | 1.850857873 | 1.1821   | 5.231493591 | -        | -          |
| Q6NTF9                   | RHBD2     | Rhomboid domain-containing protein 2                                     | -                      | -           | -        | 5.434191936 | 1.6665   | 2.07991015 |
| O75695                   | RP2       | Protein XRP2                                                             | 1.0866                 | -           | 1.6658   | 3.844675125 | 1.84     | 2.72851296 |
| P10301                   | RRAS      | Ras-related protein R-Ras                                                | 3.0007                 | 1.539788125 | 2.9135   | 9.703805581 | 1.9669   | 3.45972876 |
| P62070                   | RRAS2     | Ras-related protein R-Ras2                                               | 3.0564                 | 4.318721658 | 2.5778   | 11.09853277 | 2.9182   | 1.51155584 |
| Q96DX4                   | RSPRY1    | RING finger and SPRY domain-containing protein 1                         | -                      | -           | -        | 3.114003675 | 2.4263   | 2.27061148 |
| Q99590                   | SCAF11    | Protein SCAF11                                                           | 1.9227                 | 1.051049473 | 0.69679  | 2.091787642 | 4.2763   | -          |
| O15127                   | SCAMP2    | Secretory carrier-associated membrane protein 2                          | 9.557                  | 3.802570538 | 1.9551   | 12.28063712 | 2.0845   | 2.34620618 |
| O14828                   | SCAMP3    | Secretory carrier-associated membrane protein 3                          | 5.2933                 | 3.25203252  | 1.7562   | 14.78305861 | 2.4336   | 4.20751462 |
| Q8WTV0                   | SCARB1    | Scavenger receptor class B member 1                                      | -                      | 3.865182437 | 1.6894   | 3.465603881 | -        | -          |
| Q14108                   | SCARB2    | Lysosome membrane protein 2                                              | 4.7722                 | 3.688811834 | 2.0014   | 5.287368477 | 1.0937   | 3.16335569 |
| Q14160                   | SCRIB     | Protein scribble homolog                                                 | 5.9106                 | 3.768039489 | 2.1716   | 10.2393971  | -        | -          |
| Q6IQ49-3                 | SDE2      | Protein SDE2 homolog                                                     | 2.0809                 | -           | 0.93227  | 2.000240029 | -        | -          |
| Q92854                   | SEMA4D    | Semaphorin-4D                                                            | 22.693                 | 3.705625139 | 2.1099   | 6.962818549 | 1.0888   | 1.90389155 |
| Q9NRX5                   | SERINC1   | Serine incorporator 1                                                    | -                      | -           | -        | 16.94053871 | 0.41537  | 2.50337956 |
| Q58719                   | SFT2D3    | Vesicle transport protein SFT2C                                          | 2.36                   | -           | -        | 5.316038488 | -        | -          |
| Q6IA17                   | SIGIRR    | Single Ig IL-1-related receptor                                          | 2.2138                 | 2.086985558 | 2.159    | 5.980861244 | -        | -          |
| P41440                   | SLC19A1   | Folate transporter 1                                                     | -                      | -           | -        | 4.458513532 | 1.1047   | 2.33448501 |
| Q15758                   | SLC1A5    | Neutral amino acid transporter B(0)                                      | 7.741                  | 4.032420662 | 1.8877   | 20.28562155 | 2.4348   | 3.29804426 |
| Q8TB61-3                 | SLC35B2   | Adenosine 3-phospho 5-phosphosulfate transporter 1                       | -                      | -           | -        | 6.547930854 | 1.1332   | 3.27944118 |
| Q96QD8                   | SLC38A2   | Sodium-coupled neutral amino acid transporter 2                          | -                      | -           | -        | 8.126777733 | 0.84689  | 2.01686096 |
| Q9ULF5                   | SLC39A10  | Zinc transporter ZIP10                                                   | -                      | -           | 2.4551   | 6.655131106 | -        | -          |
| Q8NB15                   | SLC43A3   | Solute carrier family 43 member 3                                        | -                      | -           | -        | 9.500285009 | 2.0615   | 1.99896054 |
| Q8WWV5                   | SLC44A1   | Choline transporter-like protein 1                                       | -                      | -           | 0.89648  | 13.53088424 | 3.3028   | 2.66297401 |
| P30825                   | SLC7A1    | High affinity cationic amino acid transporter 1                          | 4.176                  | 3.385813442 | 1.5932   | 10.54362954 | 1.0858   | 2.21680337 |
| Q92581-3                 | SLC9A6    | Sodium/hydrogen exchanger 6                                              | -                      | -           | -        | 8.010894817 | 3.2584   | 3.04747973 |

| UniProt Accession Number | Gene Name | Protein                                                                  | Isotopic Ratio (n = 6) |             |          |             |          |            |
|--------------------------|-----------|--------------------------------------------------------------------------|------------------------|-------------|----------|-------------|----------|------------|
|                          |           |                                                                          | Sample 1               | Sample 2    | Sample 3 | Sample 4    | Sample 5 | Sample 6   |
| O00161                   | SNAP23    | Synaptosomal-associated protein 23                                       | 10.414                 | 4.488128899 | 2.3253   | 18.29156759 | 4.3844   | 5.91715976 |
| P60880-2                 | SNAP25    | Synaptosomal-associated protein 25                                       | 3.4665                 | 3.350757271 | -        | -           | -        | -          |
| Q9Y5W9                   | SNX11     | Sorting nexin-11                                                         | 2.9044                 | -           | 1.5794   | 4.959579428 | -        | -          |
| Q99523                   | SORT1     | Sortilin                                                                 | 11.29                  | 2.281594378 | 2.3598   | 10.14754531 | 3.404    | 1.46918387 |
| Q7Z698                   | SPRED2    | Sprouty-related, EVH1 domain-containing protein 2                        | -                      | -           | -        | -           | 4.7168   | 3.56328392 |
| O43609                   | SPRY1     | Protein sprouty homolog 1                                                | 2.6019                 | -           | -        | -           | 1.7752   | 1.26646403 |
| Q5W111                   | SPRY7     | SPRY domain-containing protein 7                                         | 2.0315                 | 4.585052728 | 2.9239   | 8.113590264 | 2.0963   | 3.80517504 |
| Q9NZ72                   | STMN3     | Stathmin                                                                 | 14.459                 | 6.808742425 | 2.4879   | 17.65692593 | 1.0288   | 3.78988858 |
| O60499                   | STX10     | Syntaxin-10                                                              | 13.085                 | 4.153513873 | 1.6323   | 28.50058426 | -        | 1.19587185 |
| O75558                   | STX11     | Syntaxin-11                                                              | -                      | -           | 2.4008   | 10.49406036 | -        | -          |
| Q86Y82                   | STX12     | Syntaxin-12                                                              | 10.046                 | 3.481772919 | 2.7637   | 8.4324142   | 1.0347   | 1.45785346 |
| P32856-3                 | STX2      | Syntaxin-2                                                               | -                      | -           | 2.9654   | 8.840951286 | -        | -          |
| Q12846                   | STX4      | Syntaxin-4                                                               | -                      | -           | 3.1131   | 29.65071458 | -        | 1.32553916 |
| O43752                   | STX6      | Syntaxin-6                                                               | 13.814                 | 4.794093677 | 3.0489   | 37.82434375 | -        | 0.58173357 |
| O15400                   | STX7      | Syntaxin-7                                                               | 5.02                   | 3.891656289 | 3.7568   | 21.07437146 | 0.93711  | 1.39120757 |
| Q9UNK0                   | STX8      | Syntaxin-8                                                               | 4.5759                 | 5.280109826 | 3.5346   | 9.954210631 | -        | 1.52870137 |
| Q8NHG7                   | SVIP      | Small VCP/p97-interacting protein                                        | 5.69                   | 8.150623523 | -        | -           | 2.0745   | 5.55864369 |
| Q96BS2                   | TESC      | Calcineurin B homologous protein 3                                       | 12.435                 | 11.91738866 | 3.9911   | 17.52879104 | 1.6251   | 1.09140518 |
| P02787                   | TF        | Serotransferrin                                                          | -                      | 5.679559266 | -        | -           | 0.17545  | 6.64054718 |
| Q9H5Q4                   | TFB2M     | Dimethyladenosine transferase 2, mitochondrial                           | 2.8323                 | 1.959094115 | 1.9921   | 5.524861878 | -        | 0.9569378  |
| Q13445                   | TMED1     | Transmembrane emp24 domain-containing protein 1                          | 6.9403                 | 5.141916907 | 2.9343   | 8.742787201 | -        | 1.39118821 |
| Q9H6X4                   | TMEM134   | Transmembrane protein 134                                                | -                      | -           | 2.4176   | 6.346385733 | -        | -          |
| Q8IY95                   | TMEM192   | Transmembrane protein 192                                                | 4.2138                 | 4.174145344 | 2.9166   | 13.06130979 | -        | -          |
| Q9H813                   | TMEM206   | Transmembrane protein 206                                                | 7.0185                 | 5.690224195 | 2.7283   | 17.13473039 | -        | -          |
| O94886                   | TMEM63A   | Transmembrane protein 63A                                                | -                      | -           | -        | 7.602250266 | 3.9462   | 6.30040323 |
| Q96BF3                   | TMIGD2    | Transmembrane and immunoglobulin domain-containing protein 2             | -                      | 1.172374175 | 2.2973   | 4.160079874 | -        | -          |
| Q9H3N1                   | TMX1      | Thioredoxin-related transmembrane protein 1                              | 13.552                 | 5.778008898 | 1.1153   | 15.13317191 | 3.7697   | 4.62320851 |
| Q96JJ7                   | TMX3      | Protein disulfide-isomerase TMX3                                         | 5.914                  | 6.040106306 | 2.5085   | 11.48052902 | 1.2742   | 1.44098448 |
| Q9H1E5                   | TMX4      | Thioredoxin-related transmembrane protein 4                              | 5.7338                 | 5.336748853 | 1.7486   | 16.40985248 | 2.0131   | 2.83430645 |
| P28908                   | TNFRSF8   | Tumor necrosis factor receptor superfamily member 8                      | 6.0808                 | 3.260089978 | 3.4813   | 19.53811887 | 0.92651  | -          |
| Q9Y228                   | TRAF3IP3  | TRAF3-interacting JNK-activating modulator                               | 8.6536                 | 3.55353399  | 2.4631   | 10.58761249 | 1.667    | 1.6496478  |
| O43617                   | TRAPPC3   | Trafficking protein particle complex subunit 3                           | 11.761                 | 4.040077569 | 0.92272  | 35.03485969 | 3.2267   | 2.56147541 |
| Q8NG11                   | TSPAN14   | Tetraspanin-14                                                           | -                      | 6.847439058 | -        | 12.93912143 | -        | 3.61532899 |
| O95858                   | TSPAN15   | Tetraspanin-15                                                           | -                      | -           | -        | -           | 5.3407   | 2.531197   |
| Q86UF1                   | TSPAN33   | Tetraspanin-33                                                           | -                      | -           | 1.5255   | 6.512112529 | -        | 1.87938131 |
| P41732                   | TSPAN7    | Tetraspanin-7                                                            | 1.8956                 | 5.377211378 | 2.8123   | 25.89197867 | 1.5264   | 3.78687469 |
| Q8NFM3                   | TSTD1     | Thiosulfate sulfurtransferase/rhodanese-like domain-containing protein 1 | 8.605                  | 2.420838578 | -        | -           | -        | -          |
| Q9Y3C8                   | UFC1      | Ubiquitin-fold modifier-conjugating enzyme 1                             | 3.0142                 | 1.143902997 | 0.67553  | 11.00400546 | 2.5191   | 2.198672   |
| Q15836                   | VAMP3     | Vesicle-associated membrane protein 3                                    | 11.192                 | 6.223549913 | 1.1528   | 22.72210861 | 2.2941   | 3.09319806 |
| O75379                   | VAMP4     | Vesicle-associated membrane protein 4                                    | 14.147                 | 9.336196434 | 2.8978   | 97.70395701 | 4.2415   | 2.75269764 |
| O95183                   | VAMP5     | Vesicle-associated membrane protein 5                                    | 35.482                 | 7.779679477 | 1.5924   | -           | -        | -          |
| Q8IUH4                   | ZDHHC13   | Palmitoyltransferase ZDHHC13                                             | -                      | -           | -        | 5.106469897 | 2.1945   | 3.28558286 |
| Q8IUH5                   | ZDHHC17   | Palmitoyltransferase ZDHHC17                                             | -                      | -           | -        | 5.536791983 | 3.5278   | 3.17248818 |
| Q9C0B5                   | ZDHHC5    | Palmitoyltransferase ZDHHC5                                              | -                      | -           | 2.1445   | -           | 2.3957   | 2.80559998 |
